# Supplementary material
Source: publisher figshare collection journal article supplement (https://gsapubs.figshare.com/articles/dataset/_/12250148)
Supplement: Supplementary file 1 [file 1]

**Table S5: Thermal History Modeling Input Data**

**Apatite Fission track data**

Boettcher and Milliken (1994)

| Sample No. | pd(Nd)       | Ps (Ns)      | pi           | FT age | error | U (ppm) | avg track<br>length | error | std dev (microns) |
|------------|--------------|--------------|--------------|--------|-------|---------|---------------------|-------|-------------------|
| KY49       | 1.585 (7420) | 1.631 (1125) | 4.479 (3089) | 98.3   | 7.4   | 44      | 12.37               | 1.6   | 2.05              |
| VA26       | 1.585        | 1.563        | 4.034        | 104    | 8     | 40      | 12.55               | 0.92  | 1.58              |
| KY112      | 1.612        | 1.596        | 3.497        | 125    | 10    | 34      | 12.09               | 1.06  | 1.82              |
| VA24       | 1.612        | 1.806        | 5.384        | 92.1   | 7     | 52      | 12.34               | 0.86  | 1.76              |
| KY115      | 1.612        | 1.521        | 3.483        | 120    | 10    | 34      | 12.46               | 0.9   | 1.55              |
| VA4        | 1.585        | 1.933        | 4.354        | 123    | 8     | 43      | 12.13               | 0.84  | 1.54              |
| VA6        | 1.612        | 1.336        | 3.764        | 97.5   | 8.4   | 36      | 12.23               | 0.8   | 1.48              |
| VA19       | 1.585        | 2.787        | 5.455        | 137    | 8     | 54      | 12.86               | 0.72  | 1.27              |
| KY46       | 1.585        | 2.3          | 4.861        | 127    | 8     | 48      | 12.47               | 0.84  | 1.65              |
| KY109      | 1.585        | 2.222        | 4.572        | 131    | 8     | 44      | 12.87               | 0.88  | 1.7               |

**Vitrinite Reflectance data**

From O'Hara et. al. (1989)

**Fire Clay Coal – 310 Ma – Hyden Fm.**

Pre-orogenic maturation: **Ro = 0.85% (Temperature ~128 °C)**

Following thrust emplacement: **Ro = 1.0%\***

Burial to depth = **1.9 to 2.2 Km**

Burial to depth after overthrust emplacement = **~5 km\***

\*Thermal equilibrium not reached after overthrust due to rapid uplift immediately (1 Ma) after emplacement.

From Hower and Rimmer, 1990:

**Fire Clay Coal:**

*Perry County*

Rmax = **0.93%, 0.86%, and 0.79%**

*Pike County*

Rmax = **0.87% and 0.84%**

Effective heating times = **25 – 35 m.y.**

**Pond Creek Coal - ~ 250 m below Fire Clay Coal in **Pikeville Fm.****

Rmax = **1.01%**

Paleogeothermal Gradient = **40 – 45 °C/Km**

From Boettcher and Milliken, 1994:

---

**Fire Clay Coal**

*Pike County*

Rmax = between 0.80% and 0.90%

**Pond Creek Coal**

*Pike County*

Rmax = between 1.0% and 1.1%

Post-depositional Temperatures = 110 to 150 °C

Effective heating times = 50 to 75 m.y.

Minimum T for Breathitt Fm. From Apatite Fission Track = 110 °C

Geothermal gradient = 25 +- 5 °C/Km

|               |      |
|---------------|------|
| Average Rmax= | 0.91 |
| Rmean=        | 0    |
