# Supplementary material
Source: publisher figshare collection journal article supplement (https://gsapubs.figshare.com/articles/dataset/_/12250148)
Supplement: Supplementary file 2 [file 1]

**Table S2a Detrital Monazite SIMS Th-Pb geochronology analysis**

|            | Age (Ma)        |                           | 208Pb/<br>204Pb | 204Pb | 208Pb/<br>232Th | 208Pb/<br>232Th<br>1 s.e. | ThO2/<br>Th | ThO2/<br>Th<br>1 s.e. | % Radio.<br>208Pb |
|------------|-----------------|---------------------------|-----------------|-------|-----------------|---------------------------|-------------|-----------------------|-------------------|
|            | 208Pb/<br>232Th | 208Pb/<br>232Th<br>1 s.e. |                 |       |                 |                           |             |                       |                   |
|            |                 |                           |                 |       |                 |                           |             |                       |                   |
| EC17-1B@11 | 332             | 8                         | 12560           | 1.01  | 0.0166          | 0.0004                    | 5.3650      | 0.0259                | 100               |
| EC17-1B@12 | 399             | 10                        | 13890           | 0.97  | 0.0199          | 0.0005                    | 4.7960      | 0.0211                | 100               |
| EC17-1B@13 | 461             | 12                        | 10450           | 0.45  | 0.0231          | 0.0006                    | 4.6620      | 0.0380                | 100               |
| EC17-1B@14 | 812             | 16                        | 12530           | 3.08  | 0.0410          | 0.0008                    | 6.1770      | 0.0207                | 100               |
| EC17-1B@16 | 952             | 24                        | 26330           | 0.93  | 0.0482          | 0.0012                    | 4.6910      | 0.0147                | 100               |
| EC17-1B@17 | 418             | 14                        | 11430           | 0.66  | 0.0209          | 0.0007                    | 3.9010      | 0.0224                | 100               |
| EC17-1B@2. | 422             | 9                         | 6783            | 1.28  | 0.0211          | 0.0005                    | 5.1830      | 0.0250                | 99                |
| EC17-1B@20 | 793             | 26                        | 6426            | 7.50  | 0.0400          | 0.0013                    | 3.7810      | 0.0074                | 99                |
| EC17-1B@23 | 553             | 15                        | 384             | 4.71  | 0.0278          | 0.0007                    | 5.2790      | 0.0583                | 90                |
| EC17-1B@26 | 466             | 16                        | 1731            | 0.84  | 0.0233          | 0.0008                    | 4.3270      | 0.0580                | 98                |
| EC17-1B@27 | 824             | 17                        | 34930           | 0.93  | 0.0416          | 0.0009                    | 5.4130      | 0.0257                | 100               |
| EC17-1B@29 | 394             | 7                         | 7057            | 1.07  | 0.0197          | 0.0004                    | 5.9710      | 0.0353                | 99                |
| EC17-1B@3. | 447             | 9                         | 16180           | 0.81  | 0.0224          | 0.0005                    | 5.5430      | 0.0376                | 100               |
| EC17-1B@30 | 574             | 30                        | 237             | 2.18  | 0.0288          | 0.0015                    | 3.7070      | 0.0814                | 84                |
| EC17-1B@32 | 404             | 10                        | 6766            | 1.13  | 0.0202          | 0.0005                    | 4.6430      | 0.0322                | 99                |
| EC17-1B@33 | 334             | 7                         | 15400           | 0.78  | 0.0167          | 0.0004                    | 5.2580      | 0.0125                | 100               |
| EC17-1B@35 | 393             | 21                        | 159             | 2.42  | 0.0196          | 0.0011                    | 8.1660      | 0.1676                | 76                |
| EC17-1B@36 | 365             | 8                         | 8863            | 1.31  | 0.0182          | 0.0004                    | 5.4310      | 0.0172                | 100               |
| EC17-1B@37 | 949             | 22                        | 14890           | 1.90  | 0.0481          | 0.0011                    | 5.1710      | 0.0134                | 100               |
| EC17-1B@38 | 396             | 7                         | 5831            | 1.09  | 0.0198          | 0.0004                    | 5.8660      | 0.0338                | 99                |
| EC17-1B@39 | 414             | 10                        | 5898            | 1.22  | 0.0207          | 0.0005                    | 4.9500      | 0.0284                | 99                |
| EC17-1B@41 | 435             | 14                        | 5616            | 0.45  | 0.0218          | 0.0007                    | 4.0640      | 0.0616                | 99                |
| EC17-1B@42 | 506             | 14                        | 13040           | 0.48  | 0.0253          | 0.0007                    | 4.4250      | 0.0495                | 100               |
| EC17-1B@43 | 457             | 17                        | 425             | 0.87  | 0.0229          | 0.0008                    | 6.3960      | 0.1422                | 91                |
| EC17-1B@44 | 362             | 11                        | 5744            | 0.19  | 0.0181          | 0.0005                    | 4.3590      | 0.0441                | 99                |
| EC17-1B@45 | 393             | 8                         | 7670            | 1.34  | 0.0196          | 0.0004                    | 5.7290      | 0.0226                | 100               |
| EC17-1B@46 | 406             | 9                         | 6540            | 1.55  | 0.0203          | 0.0004                    | 5.2860      | 0.0316                | 99                |
| EC17-1B@49 | 483             | 10                        | 3983            | 3.61  | 0.0242          | 0.0005                    | 5.3110      | 0.0396                | 99                |
| EC17-1B@5. | 375             | 7                         | 5786            | 1.43  | 0.0187          | 0.0004                    | 5.9280      | 0.0398                | 99                |
| EC17-1B@50 | 667             | 68                        | 4919            | 0.52  | 0.0335          | 0.0035                    | 1.9900      | 0.0142                | 99                |
| EC17-1B@51 | 319             | 8                         | 12370           | 0.98  | 0.0159          | 0.0004                    | 4.6280      | 0.0146                | 100               |
| EC17-1B@7  | 440             | 12                        | 3908            | 0.50  | 0.0220          | 0.0006                    | 4.2940      | 0.0305                | 99                |
| EC17-1B@9  | 434             | 9                         | 8833            | 0.75  | 0.0217          | 0.0005                    | 5.3030      | 0.0327                | 100               |
| EC17-2@1   | 439             | 16                        | 8298            | 1.10  | 0.0219          | 0.0008                    | 5.6080      | 0.0191                | 100               |
| EC17-2@10  | 405             | 13                        | 12450           | 0.97  | 0.0202          | 0.0007                    | 5.9760      | 0.0164                | 100               |
| EC17-2@11  | 424             | 14                        | 11720           | 1.22  | 0.0212          | 0.0007                    | 5.8440      | 0.0182                | 100               |
| EC17-2@12  | 392             | 11                        | 11450           | 1.23  | 0.0196          | 0.0006                    | 6.4040      | 0.0168                | 100               |
| EC17-2@13  | 413             | 13                        | 5305            | 1.32  | 0.0207          | 0.0007                    | 6.0350      | 0.0283                | 99                |
| EC17-2@2   | 397             | 13                        | 14950           | 0.79  | 0.0198          | 0.0007                    | 5.9090      | 0.0237                | 100               |
| EC17-2@3   | 780             | 29                        | 14080           | 1.67  | 0.0393          | 0.0015                    | 5.5570      | 0.0160                | 100               |
| EC17-2@5   | 1012            | 39                        | 55660           | 1.06  | 0.0514          | 0.0020                    | 5.3420      | 0.0097                | 100               |

|           |      |     |       |       |         |         |        |         |     |
|-----------|------|-----|-------|-------|---------|---------|--------|---------|-----|
| EC17-2@6  | 404  | 14  | 12620 | 0.95  | 0.0202  | 0.0007  | 5.7900 | 0.0273  | 100 |
| EC17-2@7  | 519  | 17  | 20680 | 0.99  | 0.0260  | 0.0009  | 5.9910 | 0.0211  | 100 |
| EC17-2@8  | 386  | 11  | 17610 | 0.74  | 0.0193  | 0.0006  | 6.2800 | 0.0229  | 100 |
| EC17-2c@1 | 1098 | 43  | 39040 | 2.91  | 0.0558  | 0.0022  | 2.7390 | 0.0170  | 100 |
| EC17-2c@2 | 972  | 456 | 5230  | 3.24  | 0.0492  | 0.0237  | 1.7130 | 0.0545  | 99  |
| EC17-2c@3 | 427  | 8   | 13090 | 1.98  | 0.0214  | 0.0004  | 3.1790 | 0.0300  | 100 |
| EC17-2c@4 | 438  | 9   | 11820 | 2.67  | 0.0219  | 0.0004  | 3.0900 | 0.0291  | 100 |
| EC17-2c@5 | 439  | 9   | 14170 | 2.34  | 0.0220  | 0.0005  | 3.0780 | 0.0278  | 100 |
| EC17-2c@6 | 438  | 31  | 1229  | 10.38 | 0.0219  | 0.0016  | 3.0690 | 0.0180  | 97  |
| EC17-3@1. | 483  | 31  | 8190  | 1.41  | 0.02418 | 0.00160 | 5.969  | 0.04941 | 100 |
| EC17-3@10 | 966  | 62  | 37970 | 1.19  | 0.04893 | 0.00320 | 6.006  | 0.01562 | 100 |
| EC17-3@12 | 373  | 41  | 13940 | 0.54  | 0.01865 | 0.00208 | 3.429  | 0.01126 | 100 |
| EC17-3@14 | 390  | 28  | 5615  | 1.81  | 0.01947 | 0.00140 | 5.446  | 0.01982 | 99  |
| EC17-3@16 | 434  | 28  | 4210  | 2.06  | 0.02172 | 0.00142 | 6.006  | 0.02631 | 99  |
| EC17-3@17 | 865  | 59  | 15410 | 1.64  | 0.04372 | 0.00306 | 5.592  | 0.01998 | 100 |
| EC17-3@18 | 433  | 31  | 7468  | 1.31  | 0.02163 | 0.00156 | 5.419  | 0.04322 | 99  |
| EC17-3@19 | 475  | 31  | 8375  | 1.52  | 0.02378 | 0.00158 | 5.926  | 0.02020 | 100 |
| EC17-3@20 | 433  | 28  | 8357  | 2.05  | 0.02166 | 0.00142 | 6.007  | 0.02986 | 100 |
| EC17-3@21 | 452  | 37  | 8173  | 1.00  | 0.02263 | 0.00189 | 4.677  | 0.01782 | 100 |
| EC17-3@22 | 931  | 75  | 24100 | 2.44  | 0.04716 | 0.00386 | 4.750  | 0.01102 | 100 |
| EC17-3@23 | 439  | 32  | 7308  | 1.70  | 0.02197 | 0.00161 | 5.348  | 0.01703 | 99  |
| EC17-3@24 | 436  | 29  | 716   | 2.69  | 0.02182 | 0.00146 | 6.213  | 0.05449 | 95  |
| EC17-3@25 | 414  | 28  | 8181  | 1.51  | 0.02068 | 0.00139 | 5.843  | 0.02995 | 100 |
| EC17-3@26 | 426  | 29  | 11010 | 1.75  | 0.02127 | 0.00147 | 5.655  | 0.02907 | 100 |
| EC17-3@27 | 398  | 25  | 5022  | 1.31  | 0.01987 | 0.00126 | 6.277  | 0.02777 | 99  |
| EC17-3@28 | 434  | 31  | 14970 | 0.79  | 0.02172 | 0.00156 | 5.486  | 0.01799 | 100 |
| EC17-3@29 | 309  | 20  | 8092  | 1.63  | 0.01539 | 0.00099 | 6.088  | 0.01656 | 100 |
| EC17-3@3. | 419  | 30  | 5623  | 1.71  | 0.02092 | 0.00149 | 5.519  | 0.01978 | 99  |
| EC17-3@30 | 444  | 27  | 3860  | 3.62  | 0.02219 | 0.00134 | 6.507  | 0.02119 | 99  |
| EC17-3@31 | 321  | 25  | 18210 | 1.19  | 0.01603 | 0.00124 | 5.055  | 0.01676 | 100 |
| EC17-3@32 | 323  | 25  | 24350 | 0.56  | 0.01609 | 0.00128 | 4.910  | 0.02149 | 100 |
| EC17-3@33 | 303  | 25  | 20920 | 0.61  | 0.01511 | 0.00127 | 4.640  | 0.01408 | 100 |
| EC17-3@34 | 424  | 32  | 40720 | 0.22  | 0.02122 | 0.00162 | 5.172  | 0.01869 | 100 |
| EC17-3@35 | 855  | 55  | 13060 | 2.08  | 0.04320 | 0.00283 | 5.990  | 0.02267 | 100 |
| EC17-3@36 | 426  | 30  | 9706  | 1.74  | 0.02127 | 0.00150 | 5.587  | 0.03091 | 100 |
| EC17-3@37 | 943  | 67  | 28900 | 2.07  | 0.04774 | 0.00347 | 5.405  | 0.01451 | 100 |
| EC17-3@38 | 415  | 29  | 7795  | 1.89  | 0.02073 | 0.00144 | 5.635  | 0.02145 | 100 |
| EC17-3@39 | 404  | 28  | 10930 | 1.78  | 0.02017 | 0.00141 | 5.617  | 0.01611 | 100 |
| EC17-3@4. | 1017 | 67  | 30620 | 1.23  | 0.05159 | 0.00350 | 5.811  | 0.01678 | 100 |
| EC17-3@40 | 332  | 24  | 10450 | 1.74  | 0.01654 | 0.00119 | 5.441  | 0.01571 | 100 |
| EC17-3@41 | 417  | 27  | 5878  | 2.01  | 0.02086 | 0.00137 | 6.015  | 0.02242 | 99  |
| EC17-3@42 | 974  | 65  | 15610 | 2.42  | 0.04935 | 0.00339 | 5.707  | 0.02146 | 100 |
| EC17-3@43 | 422  | 29  | 6975  | 1.53  | 0.02111 | 0.00148 | 5.596  | 0.01923 | 99  |
| EC17-3@44 | 848  | 56  | 23360 | 1.43  | 0.04287 | 0.00291 | 5.846  | 0.02419 | 100 |
| EC17-3@45 | 301  | 22  | 11560 | 1.66  | 0.01499 | 0.00108 | 5.427  | 0.03028 | 100 |
| EC17-3@46 | 921  | 60  | 14850 | 0.94  | 0.04662 | 0.00311 | 5.892  | 0.03689 | 100 |

|            |      |     |        |       |         |         |       |         |     |
|------------|------|-----|--------|-------|---------|---------|-------|---------|-----|
| EC17-3@47  | 389  | 31  | 6201   | 1.44  | 0.01943 | 0.00156 | 4.890 | 0.01682 | 99  |
| EC17-3@5.  | 988  | 80  | 5398   | 1.64  | 0.05011 | 0.00415 | 4.698 | 0.04355 | 99  |
| EC17-3@6.  | 435  | 29  | 5404   | 1.91  | 0.02175 | 0.00147 | 5.856 | 0.04117 | 99  |
| EC17-3@9.  | 420  | 27  | 6395   | 1.99  | 0.02100 | 0.00137 | 6.060 | 0.02636 | 99  |
| EC17-3@48  | 836  | 77  | 139600 | 0.21  | 0.04222 | 0.00395 | 4.147 | 0.02558 | 100 |
| EC17-3@49  | 428  | 27  | 9098   | 1.51  | 0.02139 | 0.00137 | 6.169 | 0.03680 | 100 |
| EC17-3@50  | 415  | 29  | 6229   | 2.33  | 0.02075 | 0.00145 | 5.610 | 0.02934 | 99  |
| EC17-3@51  | 419  | 27  | 9993   | 1.34  | 0.02096 | 0.00139 | 5.936 | 0.03803 | 100 |
| EC17-3@52  | 420  | 29  | 5417   | 2.24  | 0.02100 | 0.00145 | 5.674 | 0.02504 | 99  |
| EC17-3@53  | 438  | 30  | 7998   | 1.11  | 0.02192 | 0.00150 | 5.748 | 0.02273 | 100 |
| EC17-3@54  | 396  | 25  | 2131   | 2.00  | 0.01979 | 0.00127 | 6.245 | 0.03441 | 98  |
| EC17-3@55  | 448  | 33  | 347    | 8.47  | 0.02242 | 0.00169 | 5.254 | 0.03662 | 89  |
| EC17-3@57  | 310  | 23  | 7981   | 1.93  | 0.01546 | 0.00115 | 5.280 | 0.03215 | 100 |
| EC17-3@58  | 415  | 30  | 7332   | 1.59  | 0.02076 | 0.00152 | 5.385 | 0.02591 | 99  |
| EC17-3@59  | 351  | 26  | 7159   | 2.71  | 0.01752 | 0.00130 | 5.292 | 0.01203 | 99  |
| EC17-3@60  | 399  | 28  | 7324   | 1.53  | 0.01996 | 0.00140 | 5.601 | 0.03941 | 99  |
| EC17-3@62  | 383  | 27  | 2553   | 2.01  | 0.01915 | 0.00135 | 5.578 | 0.07752 | 99  |
| EC17-3@63  | 416  | 31  | 3231   | 3.45  | 0.02077 | 0.00157 | 5.155 | 0.01674 | 99  |
| EC17-3@64  | 402  | 28  | 4576   | 1.86  | 0.02007 | 0.00140 | 5.651 | 0.03912 | 99  |
| EC17-3@65  | 375  | 27  | 1477   | 5.59  | 0.01875 | 0.00136 | 5.412 | 0.02768 | 97  |
| EC17-3@66  | 313  | 26  | 6309   | 1.81  | 0.01560 | 0.00129 | 4.707 | 0.01414 | 99  |
| EC17-3@67  | 413  | 30  | 5898   | 2.09  | 0.02065 | 0.00150 | 5.383 | 0.01679 | 99  |
| SL17-5@1   | 1084 | 142 | 12600  | 5.79  | 0.05511 | 0.00739 | 4.618 | 0.02332 | 100 |
| SL17-5@4   | 434  | 47  | 5051   | 3.63  | 0.02171 | 0.00239 | 5.393 | 0.04749 | 99  |
| SL17-5@6   | 1064 | 100 | 1544   | 14.80 | 0.05405 | 0.00524 | 5.969 | 0.04008 | 98  |
| SL17-5@8   | 489  | 50  | 903    | 4.11  | 0.02447 | 0.00254 | 5.678 | 0.05051 | 96  |
| SL17-5@9   | 355  | 30  | 2639   | 4.20  | 0.01772 | 0.00153 | 6.564 | 0.04962 | 99  |
| SL17-5@10  | 381  | 54  | 1871   | 7.67  | 0.01904 | 0.00270 | 4.427 | 0.03415 | 98  |
| SL17-5@12  | 1919 | 182 | 4995   | 10.83 | 0.09958 | 0.00990 | 5.838 | 0.02410 | 99  |
| SL17-5@13  | 855  | 83  | 10510  | 1.96  | 0.04321 | 0.00429 | 5.835 | 0.03966 | 100 |
| SL17-5@15  | 446  | 49  | 3981   | 1.82  | 0.02232 | 0.00250 | 5.302 | 0.02911 | 99  |
| SL17-5@16  | 1546 | 160 | 11680  | 9.11  | 0.07951 | 0.00856 | 5.484 | 0.02242 | 100 |
| SL17-5@18  | 457  | 64  | 440    | 13.99 | 0.02288 | 0.00324 | 4.434 | 0.01969 | 91  |
| SL17-5@19  | 1116 | 98  | 6505   | 4.81  | 0.05674 | 0.00513 | 6.339 | 0.02252 | 99  |
| SL17-5@20  | 2611 | 210 | 24030  | 3.50  | 0.13790 | 0.01182 | 6.594 | 0.05051 | 100 |
| SL17-5@21  | 401  | 39  | 1092   | 7.04  | 0.02004 | 0.00195 | 5.941 | 0.02489 | 96  |
| SL17-5@23  | 432  | 41  | 1241   | 10.04 | 0.02160 | 0.00205 | 6.071 | 0.05586 | 97  |
| SL17-5@24  | 446  | 40  | 652    | 11.83 | 0.02231 | 0.00203 | 6.312 | 0.05349 | 94  |
| SL17-5@28  | 957  | 117 | 7240   | 5.03  | 0.04851 | 0.00607 | 4.866 | 0.01300 | 99  |
| SL17-5@29  | 424  | 40  | 5094   | 2.17  | 0.02118 | 0.00200 | 6.094 | 0.03552 | 99  |
| SL17-5@30  | 415  | 47  | 824    | 10.62 | 0.02074 | 0.00236 | 5.238 | 0.04685 | 95  |
| SL17-5@32  | 1774 | 164 | 20880  | 4.31  | 0.09174 | 0.00885 | 5.975 | 0.02111 | 100 |
| SL17-5b@1  | 366  | 9   | 4324   | 1.81  | 0.01828 | 0.00046 | 6.367 | 0.03243 | 99  |
| SL17-5b@10 | 413  | 10  | 18310  | 0.93  | 0.02064 | 0.00051 | 6.356 | 0.02594 | 100 |
| SL17-5b@11 | 901  | 24  | 21280  | 0.88  | 0.04556 | 0.00124 | 5.654 | 0.02841 | 100 |
| SL17-5b@12 | 312  | 9   | 4611   | 1.24  | 0.01557 | 0.00046 | 4.521 | 0.03324 | 99  |

|            |      |    |       |       |         |         |       |         |     |
|------------|------|----|-------|-------|---------|---------|-------|---------|-----|
| SL17-5b@13 | 390  | 10 | 9897  | 1.23  | 0.01949 | 0.00049 | 6.114 | 0.01576 | 100 |
| SL17-5b@15 | 846  | 21 | 47080 | 1.00  | 0.04275 | 0.00111 | 5.809 | 0.02430 | 100 |
| SL17-5b@16 | 374  | 9  | 13800 | 1.21  | 0.01868 | 0.00046 | 6.505 | 0.02226 | 100 |
| SL17-5b@2  | 2251 | 56 | 16450 | 4.72  | 0.11780 | 0.00312 | 6.872 | 0.04251 | 100 |
| SL17-5b@3  | 2328 | 57 | 2038  | 59.91 | 0.12210 | 0.00315 | 6.345 | 0.03787 | 98  |
| SL17-5b@4  | 437  | 10 | 2466  | 1.08  | 0.02186 | 0.00052 | 7.447 | 0.08736 | 98  |
| SL17-5b@5  | 384  | 10 | 3161  | 1.63  | 0.01918 | 0.00052 | 5.760 | 0.06654 | 99  |
| SL17-5b@7  | 397  | 11 | 5616  | 1.97  | 0.01982 | 0.00054 | 5.312 | 0.02274 | 99  |
| SL17-5b@8  | 973  | 25 | 13130 | 2.74  | 0.04932 | 0.00132 | 5.810 | 0.02806 | 100 |
| SL17-5b@9  | 848  | 21 | 8096  | 3.16  | 0.04286 | 0.00108 | 6.375 | 0.02548 | 100 |
| SL17-5c@1  | 441  | 9  | 15890 | 2.26  | 0.02204 | 0.00048 | 2.96  | 0.05667 | 100 |
| SL17-5c@2  | 391  | 8  | 1139  | 23.61 | 0.01953 | 0.00038 | 3.13  | 0.04729 | 97  |
| SL17-5c@3  | 433  | 9  | 11340 | 2.72  | 0.02167 | 0.00045 | 3.08  | 0.01300 | 100 |
| SL17-5c@4  | 450  | 9  | 15990 | 2.72  | 0.02253 | 0.00048 | 2.99  | 0.03552 | 100 |
| SL17-5c@5  | 957  | 16 | 12320 | 2.64  | 0.04850 | 0.00082 | 3.44  | 0.04685 | 100 |
| SL17-5c@6  | 433  | 9  | 3974  | 5.42  | 0.02165 | 0.00044 | 3.26  | 0.13120 | 99  |
| SL17-5c@7  | 440  | 9  | 1447  | 17.19 | 0.02202 | 0.00047 | 3.11  | 0.02111 | 97  |
| SL17-5c@8  | 1789 | 38 | 52280 | 3.54  | 0.09257 | 0.00206 | 2.88  | 0.04028 | 100 |
| SL17-5c@9  | 439  | 11 | 1145  | 23.16 | 0.02194 | 0.00055 | 3.06  | 0.02332 | 97  |
| SL17-5c@10 | 1108 | 21 | 47240 | 1.83  | 0.05636 | 0.00109 | 3.15  | 0.10940 | 100 |
| SL17-5c@11 | 1051 | 21 | 38590 | 3.00  | 0.05335 | 0.00109 | 3.05  | 0.05761 | 100 |
| SL17-5c@12 | 501  | 64 | 4732  | 3.25  | 0.02511 | 0.00323 | 2.66  | 0.04749 | 99  |
| SL17-5c@13 | 428  | 8  | 15750 | 1.69  | 0.02142 | 0.00041 | 3.14  | 0.01831 | 100 |
| SL17-5c@14 | 459  | 10 | 7373  | 3.93  | 0.02295 | 0.00052 | 2.90  | 0.04008 | 99  |
| SL17-5c@15 | 1052 | 27 | 14610 | 4.33  | 0.05342 | 0.00140 | 2.96  | 0.10400 | 100 |
| SL17-5c@16 | 432  | 8  | 7726  | 3.95  | 0.02159 | 0.00043 | 3.13  | 0.05051 | 100 |
| SL17-5c@17 | 977  | 18 | 38220 | 2.34  | 0.04952 | 0.00094 | 3.14  | 0.04962 | 100 |
| SL17-5c@18 | 425  | 8  | 3866  | 7.19  | 0.02125 | 0.00041 | 3.29  | 0.03415 | 99  |
| SL17-5c@19 | 409  | 7  | 8495  | 2.82  | 0.02046 | 0.00036 | 3.29  | 0.07855 | 100 |
| SL17-5c@20 | 416  | 8  | 10410 | 2.22  | 0.02080 | 0.00040 | 3.21  | 0.02410 | 100 |
| SL17-5c@21 | 375  | 8  | 8677  | 3.13  | 0.01874 | 0.00040 | 2.96  | 0.03966 | 100 |
| SL17-5c@22 | 365  | 7  | 1674  | 11.92 | 0.01821 | 0.00037 | 3.28  | 0.02911 | 98  |
| SL17-5c@23 | 374  | 7  | 2940  | 7.08  | 0.01867 | 0.00036 | 3.55  | 0.02242 | 99  |
| SL17-5c@25 | 1124 | 24 | 1904  | 36.97 | 0.05719 | 0.00126 | 3.06  | 0.01831 | 98  |

**Table 2b: Detrital Diagenetic Monazite Th-Pb geochronology analysis**

|            | Age (Ma)        | Age (Ma)        |                 |        |                 |                 |             |             | % Radio. |
|------------|-----------------|-----------------|-----------------|--------|-----------------|-----------------|-------------|-------------|----------|
|            | 208Pb/<br>232Th | 208Pb/<br>232Th | 208Pb/<br>204Pb | 204Pb  | 208Pb/<br>232Th | 208Pb/<br>232Th | ThO2/<br>Th | ThO2/<br>Th | 208Pb    |
|            |                 | 1 s.e.          |                 |        |                 | 1 s.e.          |             | 1 s.e.      |          |
| EC17-1B@18 | 418             | 18              | 2580            | 0.2169 | 0.0209          | 0.0009          | 3.2830      | 0.0326      | 99       |
| EC17-1B@19 | 941             | 24              | 11030           | 3.2590 | 0.0477          | 0.0012          | 4.9130      | 0.0153      | 100      |
| EC17-1B@22 | 526             | 21              | 327             | 1.5600 | 0.0264          | 0.0011          | 4.1470      | 0.0619      | 88       |
| EC17-1B@24 | 395             | 9               | 2880            | 1.5420 | 0.0197          | 0.0005          | 5.1040      | 0.0480      | 99       |
| EC17-1B@25 | 445             | 18              | 356             | 1.3170 | 0.0223          | 0.0009          | 4.0440      | 0.0830      | 89       |
| EC17-1B@28 | 514             | 11              | 5245            | 2.7600 | 0.0258          | 0.0006          | 5.0800      | 0.0134      | 99       |
| EC17-1B@31 | 442             | 14              | 725             | 1.1340 | 0.0221          | 0.0007          | 5.4100      | 0.1297      | 95       |
| EC17-1B@34 | 484             | 17              | 248             | 2.3910 | 0.0243          | 0.0009          | 4.7420      | 0.1008      | 85       |
| EC17-1B@4. | 433             | 9               | 7884            | 1.3500 | 0.0217          | 0.0005          | 5.4050      | 0.0251      | 100      |
| EC17-1B@40 | 692             | 61              | 527             | 0.6924 | 0.0348          | 0.0031          | 2.1860      | 0.0373      | 93       |
| EC17-1B@47 | 420             | 11              | 3092            | 1.8600 | 0.0210          | 0.0006          | 4.5120      | 0.0246      | 99       |
| EC17-1B@6. | 461             | 10              | 6585            | 1.9850 | 0.0231          | 0.0005          | 5.2110      | 0.0198      | 99       |
| EC17-1B@8. | 410             | 11              | 1882            | 1.2750 | 0.0205          | 0.0006          | 4.4110      | 0.0535      | 98       |
| EC17-2b@4  | 398             | 13              | 8165            | 1.2090 | 0.0199          | 0.0006          | 5.9630      | 0.0440      | 100      |
| EC17-2b@9  | 472             | 24              | 601             | 1.6840 | 0.0236          | 0.0012          | 4.8050      | 0.0426      | 94       |
| EC17-3@2   | 413             | 43              | 563             | 1.60   | 0.02062         | 0.00219         | 3.688       | 0.05779     | 93       |
| EC17-3@7   | 463             | 29              | 2484            | 1.66   | 0.02316         | 0.00148         | 6.242       | 0.06007     | 98       |
| EC17-3@8   | 776             | 55              | 1465            | 1.59   | 0.03916         | 0.00284         | 5.522       | 0.07363     | 97       |
| SL17-5@2.  | 460             | 60              | 469             | 1.639  | 0.02302         | 0.00306         | 4.845       | 0.10940     | 92       |
| SL17-5@3.  | 1625            | 153             | 10170           | 8.018  | 0.08371         | 0.00822         | 5.895       | 0.05761     | 100      |
| SL17-5@5.  | 2137            | 233             | 20290           | 2.525  | 0.11150         | 0.01283         | 5.195       | 0.01831     | 100      |
| SL17-5@7.  | 541             | 56              | 380             | 5.163  | 0.02711         | 0.00286         | 5.655       | 0.10400     | 90       |
| SL17-5@11  | 920             | 124             | 166             | 9.954  | 0.04658         | 0.00640         | 4.642       | 0.07855     | 77       |
| SL17-5@22  | 728             | 173             | 197             | 9.139  | 0.03669         | 0.00889         | 3.089       | 0.03457     | 81       |
| SL17-5@25  | 713             | 100             | 261             | 8.067  | 0.03590         | 0.00511         | 4.442       | 0.04380     | 85       |
| SL17-5@26  | 642             | 199             | 4508            | 0.300  | 0.03228         | 0.01016         | 2.627       | 0.05667     | 99       |
| SL17-5@27  | 708             | 85              | 260             | 10.890 | 0.03565         | 0.00437         | 4.996       | 0.04729     | 85       |
| SL17-5@31  | 736             | 90              | 117             | 10.030 | 0.03707         | 0.00460         | 5.281       | 0.13120     | 67       |
| SL17-5b@14 | 441             | 14              | 275             | 8.71   | 0.02206         | 0.00072         | 4.854       | 0.08301     | 86       |
| SL17-5b@17 | 407             | 11              | 7950            | 1.70   | 0.02032         | 0.00053         | 5.739       | 0.01999     | 100      |
| SL17-5b@18 | 394             | 11              | 393             | 4.34   | 0.01970         | 0.00056         | 5.582       | 0.09417     | 90       |
| SL17-5b@6. | 2031            | 51              | 15480           | 1.18   | 0.10570         | 0.00281         | 5.759       | 0.03549     | 100      |
