# Supplementary material
Source: publisher figshare collection journal article supplement (https://gsapubs.figshare.com/articles/dataset/_/12250148)
Supplement: Supplementary file 3 [file 1]

**Table S3 (U-Th)/He Geochronology Analysis**

| Name           | U      | U sd  | Th    | Th sd | eU     | He (ncc) | He error | He       | Mass   | FT   | Shape | Dia. | Length | Uncorr. | He Age | He Age | U-Pb age | U-Pb Age | Post-dep. $\alpha$ -<br>ejecc. corr. age |
|----------------|--------|-------|-------|-------|--------|----------|----------|----------|--------|------|-------|------|--------|---------|--------|--------|----------|----------|------------------------------------------|
|                | ppm    |       | ppm   |       | ppm    | ncc      |          | ncc/g    | mg     |      |       | um   | um     | Age     | (Ma)   | Error  | (Ma)     | Error    |                                          |
| EC17-1B Zr 83  | 238.9  | 3.51  | 65.7  | 1.01  | 254.3  | 12.1     | 0.01645  | 8375188  | 0.0014 | 0.69 | np    | 74.7 | 128.8  | 266     | 386    | 4      | 1056     | 18       | 363                                      |
| EC17-1B Zr 112 | 172.9  | 2.49  | 91.0  | 1.32  | 194.3  | 13.0     | 0.00680  | 8693775  | 0.0015 | 0.69 | pp    | 76.0 | 128.5  | 359     | 517    | 5      | 1075     | 15       | 454                                      |
| EC17-1B Zr 121 | 88.5   | 1.32  | 94.0  | 1.42  | 110.6  | 4.4      | 0.00323  | 3458611  | 0.0013 | 0.67 | nn    | 69.8 | 131.0  | 253     | 377    | 3      | 1048     | 17       | 356                                      |
| EC17-1B Zr 136 | 126.7  | 1.90  | 117.9 | 1.69  | 154.4  | 8.6      | 0.01815  | 5797879  | 0.0015 | 0.71 | np    | 82.2 | 108.7  | 303     | 428    | 4      | 1054     | 16       | 394                                      |
| EC17-1B Zr 139 | 128.5  | 1.88  | 109.0 | 1.57  | 154.1  | 7.8      | 0.00391  | 4612517  | 0.0017 | 0.73 | pp    | 89.7 | 104.2  | 243     | 334    | 3      | 1174     | 14       | 328                                      |
| EC17-1B Zr 167 | 331.5  | 4.82  | 260.9 | 3.80  | 392.8  | 20.8     | 0.01274  | 16375230 | 0.0013 | 0.69 | nn    | 77.7 | 104.5  | 335     | 484    | 4      | 439      | 4        | 431                                      |
| EC17-1B Zr 171 | 130.0  | 1.92  | 66.1  | 0.95  | 145.6  | 7.1      | 0.00257  | 5218673  | 0.0014 | 0.70 | np    | 82.2 | 100.5  | 289     | 411    | 4      | 1182     | 10       | 382                                      |
| EC17-1B Zr 173 | 224.6  | 3.30  | 64.2  | 0.93  | 239.7  | 6.9      | 0.00532  | 6380787  | 0.0011 | 0.66 | nn    | 66.7 | 120.4  | 216     | 329    | 3      | 1063     | 19       | 323                                      |
| EC17-1B Zr 176 | 1221.3 | 17.61 | 487.2 | 7.00  | 1335.8 | 25.8     | 0.01257  | 31277014 | 0.0008 | 0.66 | pp    | 73.3 | 76.2   | 191     | 288    | 2      | 1175     | 17       | 296                                      |
| EC17-1B Zr 186 | 242.7  | 3.61  | 86.0  | 1.23  | 262.9  | 10.4     | 0.00719  | 9185704  | 0.0011 | 0.67 | np    | 71.1 | 111.1  | 282     | 420    | 4      | 1073     | 17       | 385                                      |
| EC17-1B Zr 198 | 222.7  | 3.27  | 101.6 | 1.48  | 246.6  | 13.8     | 0.00938  | 7459715  | 0.0019 | 0.74 | pp    | 97.2 | 97.6   | 245     | 331    | 3      | 1067     | 15       | 326                                      |
| EC17-1B Zr 203 | 233.5  | 3.45  | 121.7 | 1.77  | 262.1  | 8.4      | 0.00613  | 8240612  | 0.0010 | 0.64 | nn    | 62.3 | 131.0  | 255     | 399    | 3      | 1357     | 19       | 367                                      |
| EC17-1B Zr 205 | 221.0  | 3.20  | 82.8  | 1.21  | 240.4  | 9.0      | 0.00892  | 6834560  | 0.0013 | 0.70 | nn    | 80.8 | 99.8   | 231     | 329    | 3      | 1165     | 16       | 324                                      |
| EC17-1B Zr 206 | 128.2  | 1.88  | 52.1  | 0.77  | 140.5  | 5.5      | 0.01164  | 4482522  | 0.0012 | 0.68 | np    | 74.2 | 110.4  | 258     | 378    | 3      | 1073     | 17       | 357                                      |
| EC17-1B Zr 220 | 46.2   | 0.68  | 32.7  | 0.48  | 53.9   | 2.9      | 0.00612  | 1345898  | 0.0021 | 0.74 | np    | 92.3 | 125.0  | 203     | 275    | 3      | 1137     | 17       | 284                                      |
| EC17-1B Zr 258 | 307.2  | 4.39  | 130.8 | 1.88  | 338.0  | 10.0     | 0.02098  | 9540206  | 0.0010 | 0.65 | nn    | 65.4 | 121.7  | 229     | 352    | 3      | 1061     | 14       | 338                                      |
| EC17-1B Zr 271 | 137.9  | 1.98  | 223.0 | 3.20  | 190.4  | 7.4      | 0.00584  | 4019616  | 0.0018 | 0.73 | nn    | 87.9 | 117.7  | 172     | 237    | 2      | 1102     | 18       | 258                                      |
| EC17-1B Zr 289 | 567.1  | 8.16  | 254.6 | 3.63  | 627.0  | 29.3     | 0.01371  | 21085954 | 0.0014 | 0.69 | np    | 76.0 | 119.3  | 272     | 393    | 4      | 404      | 4        | 368                                      |
| EC17-2 Zr 2    | 363.8  | 5.21  | 170.2 | 2.48  | 403.7  | 25.5     | 0.01740  | 15394405 | 0.0017 | 0.72 | np    | 43.5 | 108.7  | 307     | 426    | 4      | 1066     | 13       | 394                                      |
| EC17-2 Zr 14   | 137.4  | 1.99  | 142.4 | 2.04  | 170.9  | 18.9     | 0.00865  | 5957868  | 0.0032 | 0.75 | nn    | 47.0 | 178.2  | 282     | 374    | 3      | 1040     | 20       | 359                                      |
| EC17-2 Zr 25   | 300.9  | 4.33  | 105.5 | 1.51  | 325.7  | 26.2     | 0.01453  | 9998353  | 0.0026 | 0.75 | pp    | 47.7 | 142.9  | 249     | 331    | 3      | 1158     | 11       | 327                                      |
| EC17-2 Zr 29   | 190.0  | 2.71  | 253.3 | 3.61  | 249.5  | 25.6     | 0.01379  | 8662311  | 0.0030 | 0.76 | pp    | 50.2 | 146.0  | 281     | 369    | 3      | 1048     | 21       | 355                                      |
| EC17-2 Zr 36   | 293.9  | 4.22  | 120.6 | 1.76  | 322.3  | 29.7     | 0.01938  | 13239530 | 0.0022 | 0.75 | np    | 48.6 | 117.9  | 330     | 442    | 4      | 1028     | 13       | 409                                      |
| EC17-2 Zr 39   | 364.5  | 5.23  | 74.9  | 1.10  | 382.1  | 29.9     | 0.01949  | 12299843 | 0.0024 | 0.71 | nn    | 38.2 | 206.9  | 260     | 368    | 4      | 1021     | 14       | 351                                      |
| EC17-2 Zr 40   | 381.0  | 5.44  | 157.9 | 2.27  | 418.1  | 29.0     | 0.01828  | 14251120 | 0.0020 | 0.69 | nn    | 36.4 | 190.4  | 275     | 397    | 3      | 1067     | 12       | 371                                      |
| EC17-2 Zr 53   | 515.8  | 7.42  | 247.7 | 3.53  | 574.0  | 38.5     | 0.01884  | 21058556 | 0.0018 | 0.69 | nn    | 35.8 | 177.1  | 296     | 431    | 4      | 1069     | 15       | 394                                      |
| EC17-2 Zr 100  | 101.5  | 1.49  | 60.3  | 0.87  | 115.6  | 7.6      | 0.00666  | 3718990  | 0.0020 | 0.72 | pp    | 40.9 | 152.4  | 260     | 363    | 3      | 1071     | 18       | 348                                      |
| EC17-2 Zr 119  | 263.7  | 3.77  | 40.3  | 0.58  | 273.2  | 21.9     | 0.02051  | 10014957 | 0.0022 | 0.72 | nn    | 40.4 | 165.9  | 296     | 412    | 4      | 1298     | 16       | 384                                      |
| EC17-2 Zr 130  | 164.1  | 2.36  | 86.6  | 1.24  | 184.4  | 25.9     | 0.01894  | 7430584  | 0.0035 | 0.79 | np    | 58.5 | 126.1  | 324     | 413    | 4      | 1169     | 12       | 391                                      |
| EC17-2 Zr 141  | 280.3  | 4.01  | 87.0  | 1.26  | 300.8  | 33.4     | 0.02326  | 12141507 | 0.0028 | 0.76 | np    | 51.7 | 127.9  | 325     | 426    | 4      | 1412     | 13       | 399                                      |
| EC17-2 Zr 160  | 179.2  | 2.61  | 73.7  | 1.07  | 196.5  | 14.2     | 0.00814  | 7339411  | 0.0019 | 0.72 | np    | 43.1 | 129.4  | 301     | 416    | 4      | 1172     | 11       | 387                                      |
| EC17-2 Zr 163  | 279.3  | 3.99  | 86.9  | 1.28  | 299.7  | 26.2     | 0.06812  | 11676824 | 0.0022 | 0.73 | nn    | 43.3 | 148.4  | 314     | 430    | 4      | 1443     | 10       | 398                                      |
| EC17-2 Zr 171  | 230.5  | 3.30  | 73.1  | 1.05  | 247.6  | 16.5     | 0.00842  | 7379869  | 0.0022 | 0.72 | nn    | 41.1 | 164.1  | 242     | 335    | 3      | 1021     | 14       | 329                                      |
| EC17-2 Zr 174  | 312.4  | 4.49  | 84.4  | 1.24  | 332.2  | 14.9     | 0.02374  | 9781238  | 0.0015 | 0.71 | pp    | 41.7 | 108.9  | 239     | 336    | 3      | 1235     | 12       | 329                                      |
| EC17-2 Zr 175  | 516.3  | 7.37  | 134.4 | 1.93  | 547.9  | 57.2     | 0.03973  | 19047421 | 0.0030 | 0.76 | nn    | 49.5 | 152.4  | 281     | 370    | 4      | 1150     | 16       | 356                                      |
| EC17-2 Zr 219  | 45.1   | 0.65  | 18.8  | 0.27  | 49.5   | 8.2      | 0.00707  | 2163508  | 0.0038 | 0.76 | np    | 47.9 | 204.1  | 351     | 462    | 5      | 965      | 19       | 426                                      |

|               |       |      |       |      |       |      |         |          |        |      |    |      |       |     |      |    |      |    |     |
|---------------|-------|------|-------|------|-------|------|---------|----------|--------|------|----|------|-------|-----|------|----|------|----|-----|
| EC17-2 Zr 226 | 159.8 | 2.28 | 103.4 | 1.47 | 184.1 | 17.2 | 0.01218 | 7390932  | 0.0023 | 0.76 | pp | 51.7 | 108.0 | 323 | 427  | 4  | 1051 | 11 | 399 |
| EC17-2 Zr 251 | 262.2 | 3.74 | 148.6 | 2.18 | 297.1 | 22.3 | 0.01078 | 12037135 | 0.0018 | 0.68 | np | 34.9 | 188.6 | 326 | 478  | 4  | 1162 | 17 | 425 |
| EC17-2 Zr 255 | 61.6  | 0.89 | 31.8  | 0.45 | 69.0  | 7.6  | 0.01579 | 2347742  | 0.0032 | 0.79 | np | 62.3 | 103.6 | 275 | 349  | 4  | 1162 | 20 | 341 |
| EC17-2 Zr 273 | 82.2  | 1.20 | 17.7  | 0.27 | 86.3  | 5.6  | 0.00993 | 2870279  | 0.0019 | 0.74 | pp | 46.4 | 112.0 | 269 | 365  | 4  | 1077 | 13 | 351 |
| EC17-2 Zr 284 | 166.3 | 2.41 | 137.0 | 1.98 | 198.4 | 9.2  | 0.00550 | 5822826  | 0.0016 | 0.71 | nn | 41.1 | 116.8 | 238 | 335  | 3  | 1031 | 15 | 328 |
| EC17-2 Zr 306 | 141.6 | 2.10 | 81.6  | 1.18 | 160.8 | 11.4 | 0.00777 | 5765954  | 0.0020 | 0.74 | np | 48.6 | 104.0 | 289 | 390  | 4  | 1066 | 14 | 370 |
| EC17-3 Zr 32  | 350.1 | 5.01 | 78.2  | 1.13 | 368.5 | 38.4 | 0.02851 | 11516774 | 0.0033 | 0.77 | nn | 53.2 | 146.1 | 253 | 327  | 3  | 1171 | 15 | 324 |
| EC17-3 Zr 40  | 74.4  | 1.08 | 50.1  | 0.73 | 86.1  | 4.8  | 0.00888 | 3155185  | 0.0015 | 0.72 | np | 43.9 | 96.8  | 296 | 411  | 4  | 1052 | 25 | 383 |
| EC17-3 Zr 116 | 231.3 | 3.33 | 92.2  | 1.34 | 253.0 | 19.5 | 0.04597 | 10502455 | 0.0019 | 0.72 | nn | 43.3 | 122.8 | 334 | 461  | 4  | 1179 | 16 | 420 |
| EC17-3 Zr 138 | 46.7  | 0.68 | 43.7  | 0.63 | 57.0  | 8.5  | 0.00812 | 1761448  | 0.0048 | 0.79 | nn | 54.8 | 200.1 | 250 | 318  | 3  | 1065 | 21 | 317 |
| EC17-3 Zr 159 | 242.4 | 3.49 | 95.3  | 1.36 | 264.8 | 27.6 | 0.00963 | 9835277  | 0.0028 | 0.76 | nn | 48.8 | 146.4 | 299 | 396  | 4  | 1049 | 15 | 376 |
| EC17-3 Zr 162 | 150.9 | 2.16 | 26.9  | 0.38 | 157.2 | 26.0 | 0.01512 | 5324821  | 0.0049 | 0.77 | nn | 50.8 | 235.0 | 273 | 353  | 4  | 1287 | 16 | 344 |
| EC17-3 Zr 166 | 49.2  | 0.73 | 22.8  | 0.40 | 54.6  | 3.5  | 0.00589 | 2804587  | 0.0013 | 0.69 | pp | 38.0 | 108.0 | 410 | 596  | 5  | 1049 | 23 | 507 |
| EC17-3 Zr 169 | 183.4 | 2.61 | 95.3  | 1.36 | 205.8 | 26.2 | 0.01340 | 8874080  | 0.0029 | 0.74 | nn | 45.1 | 180.4 | 346 | 465  | 4  | 1181 | 15 | 426 |
| EC17-3 Zr 203 | 122.9 | 1.79 | 38.6  | 0.55 | 132.0 | 13.1 | 0.00765 | 4077428  | 0.0032 | 0.76 | np | 48.8 | 167.8 | 250 | 329  | 3  | 1171 | 16 | 325 |
| EC17-3 Zr 218 | 148.9 | 2.12 | 58.7  | 0.84 | 162.7 | 16.1 | 0.00653 | 5256353  | 0.0031 | 0.74 | np | 43.5 | 201.0 | 261 | 354  | 3  | 1052 | 20 | 343 |
| EC17-3 Zr 225 | 186.9 | 2.67 | 186.8 | 2.65 | 230.8 | 13.4 | 0.01015 | 7644125  | 0.0018 | 0.71 | np | 41.1 | 129.2 | 268 | 375  | 3  | 1050 | 12 | 357 |
| EC17-3 Zr 227 | 284.2 | 4.06 | 66.9  | 0.95 | 299.9 | 30.1 | 0.02690 | 12249470 | 0.0025 | 0.75 | np | 49.5 | 124.6 | 328 | 436  | 4  | 1415 | 16 | 405 |
| EC17-3 Zr 229 | 174.9 | 2.49 | 96.4  | 1.37 | 197.5 | 15.0 | 0.01162 | 6239117  | 0.0024 | 0.72 | np | 40.2 | 184.6 | 256 | 356  | 3  | 1064 | 18 | 344 |
| EC17-3 Zr 245 | 280.3 | 4.09 | 124.6 | 1.80 | 309.6 | 26.0 | 0.02170 | 10346111 | 0.0025 | 0.75 | np | 48.8 | 130.7 | 270 | 359  | 4  | 1042 | 15 | 347 |
| EC17-3 Zr 276 | 203.6 | 2.91 | 121.1 | 1.73 | 232.1 | 20.1 | 0.01159 | 9471416  | 0.0021 | 0.73 | pp | 44.2 | 135.4 | 328 | 449  | 4  | 1047 | 15 | 412 |
| EC17-3 Zr 307 | 64.8  | 0.93 | 58.2  | 0.83 | 78.4  | 9.9  | 0.00734 | 3430193  | 0.0029 | 0.73 | nn | 42.0 | 204.5 | 351 | 481  | 4  | 1068 | 23 | 435 |
| SL17-5 Zr 11  | 125.7 | 1.83 | 74.7  | 1.07 | 143.2 | 18.4 | 0.01449 | 6238579  | 0.0029 | 0.75 | nn | 47.3 | 163.7 | 350 | 465  | 4  | 1194 | 13 | 427 |
| SL17-5 Zr 30  | 78.3  | 1.15 | 100.2 | 1.43 | 101.9 | 9.7  | 0.00821 | 4476899  | 0.0022 | 0.75 | nn | 50.1 | 106.7 | 353 | 471  | 4  | 1663 | 14 | 431 |
| SL17-5 Zr 47  | 55.4  | 0.80 | 41.3  | 0.59 | 65.1  | 7.4  | 0.00578 | 2772532  | 0.0027 | 0.75 | nn | 47.9 | 144.0 | 342 | 455  | 4  | 1097 | 21 | 420 |
| SL17-5 Zr 54  | 121.8 | 1.75 | 51.4  | 0.74 | 133.9 | 12.7 | 0.01295 | 6521788  | 0.0019 | 0.74 | np | 47.9 | 104.9 | 390 | 526  | 5  | 1009 | 15 | 471 |
| SL17-5 Zr 55  | 62.0  | 0.88 | 30.4  | 0.44 | 69.2  | 9.0  | 0.01205 | 3304525  | 0.0027 | 0.74 | np | 43.9 | 174.3 | 382 | 518  | 5  | 1043 | 21 | 464 |
| SL17-5 Zr 58  | 88.0  | 1.26 | 61.1  | 0.88 | 102.4 | 23.2 | 0.01393 | 10693868 | 0.0022 | 0.74 | nn | 46.4 | 125.0 | 805 | 1088 | 9  | 1290 | 16 | 886 |
| SL17-5 Zr 65  | 126.9 | 1.86 | 112.6 | 1.61 | 153.4 | 24.3 | 0.03387 | 16173099 | 0.0015 | 0.68 | nn | 35.8 | 145.8 | 813 | 1192 | 10 | 1063 | 18 | 912 |
| SL17-5 Zr 74  | 215.9 | 3.13 | 78.3  | 1.12 | 234.3 | 36.6 | 0.02289 | 19763273 | 0.0018 | 0.70 | np | 38.6 | 153.7 | 657 | 934  | 8  | 1049 | 14 | 750 |
| SL17-5 Zr 91  | 148.0 | 2.11 | 79.5  | 1.14 | 166.7 | 16.7 | 0.00829 | 6684104  | 0.0025 | 0.73 | np | 42.0 | 175.8 | 323 | 444  | 4  | 1172 | 14 | 408 |
| SL17-5 Zr 109 | 95.7  | 1.39 | 63.3  | 0.95 | 110.6 | 9.5  | 0.00752 | 5985286  | 0.0016 | 0.72 | np | 42.6 | 108.5 | 431 | 603  | 5  | 2365 | 8  | 520 |
| SL17-5 Zr 178 | 103.8 | 1.48 | 95.8  | 1.37 | 126.3 | 12.5 | 0.00586 | 5918287  | 0.0021 | 0.73 | nn | 42.6 | 143.8 | 376 | 518  | 4  | 462  | 6  | 461 |
| SL17-5 Zr 182 | 87.8  | 1.25 | 28.5  | 0.42 | 94.5  | 9.5  | 0.00528 | 3996560  | 0.0024 | 0.73 | np | 41.7 | 170.3 | 340 | 468  | 4  | 1153 | 11 | 425 |
| SL17-5 Zr 194 | 60.4  | 0.94 | 31.1  | 0.45 | 67.7  | 6.5  | 0.00542 | 2529250  | 0.0026 | 0.73 | nn | 43.5 | 169.0 | 301 | 410  | 4  | 1026 | 19 | 384 |
| SL17-5 Zr 195 | 149.4 | 2.21 | 151.9 | 2.19 | 185.1 | 16.1 | 0.00747 | 6623149  | 0.0024 | 0.76 | np | 50.4 | 118.8 | 289 | 383  | 3  | 1177 | 14 | 365 |
| SL17-5 Zr 196 | 71.5  | 1.03 | 61.6  | 0.89 | 85.9  | 7.4  | 0.00742 | 3794332  | 0.0020 | 0.73 | nn | 44.8 | 120.8 | 355 | 485  | 4  | 454  | 3  | 438 |
| SL17-5 Zr 202 | 63.8  | 0.94 | 28.9  | 0.42 | 70.6  | 7.3  | 0.00603 | 2714756  | 0.0027 | 0.74 | nn | 45.7 | 159.5 | 310 | 416  | 4  | 2878 | 12 | 390 |
| SL17-5 Zr 205 | 97.2  | 1.43 | 41.1  | 0.61 | 106.8 | 10.2 | 0.00689 | 4279708  | 0.0024 | 0.71 | nn | 39.5 | 188.6 | 322 | 451  | 4  | 1123 | 19 | 411 |

|               |      |      |      |      |      |     |         |         |        |      |    |      |       |     |     |   |      |    |     |
|---------------|------|------|------|------|------|-----|---------|---------|--------|------|----|------|-------|-----|-----|---|------|----|-----|
| SL17-5 Zr 206 | 59.4 | 0.87 | 19.4 | 0.30 | 64.0 | 8.3 | 0.00763 | 2546235 | 0.0033 | 0.74 | nn | 44.2 | 207.6 | 320 | 431 | 4 | 1155 | 14 | 400 |
|---------------|------|------|------|------|------|-----|---------|---------|--------|------|----|------|-------|-----|-----|---|------|----|-----|

---
