# Supplementary material
Source: publisher figshare collection journal article supplement (https://gsapubs.figshare.com/articles/dataset/_/12250148)
Supplement: Supplementary file 4 [file 1]

**Table S4: Sample localities**

| <b>Sample No.</b> | <b>U.S.G.S. Quad.</b> | <b>Lat</b> | <b>Long</b> | <b>Comment</b>                                |
|-------------------|-----------------------|------------|-------------|-----------------------------------------------|
| EC17-1B           | Elkhorn City          | 37.344875  | -82.428479  | Grundy Fm.: KY Hwy 3174                       |
| EC17-2            | Elkhorn City          | 37.344787  | -82.431875  | Grundy Fm.: KY Hwy 3174                       |
| EC17-3            | Elkhorn City          | 37.343657  | -82.434096  | Grundy Fm.: KY Hwy 3174                       |
| SL17-5            | Slade                 | 37.800298  | -83.656160  | Corbin Sandstone; Bert T. Combs Mountain Pkwy |
| SL19-1            | Slade                 | 37.798919  | -83.654675  | Corbin Sandstone; Bert T. Combs Mountain Pkwy |
