# Supplementary material
Source: publisher figshare collection journal article supplement (https://gsapubs.figshare.com/articles/dataset/_/12250148)
Supplement: Supplementary file 5 [file 1]

| Table S1a Detrital Zircon U-Pb geochronologic analyses. |       |       |         |      |         |     |                |     |        |     |       |                    |    |        |    |        |    |          |    |      |
|---------------------------------------------------------|-------|-------|---------|------|---------|-----|----------------|-----|--------|-----|-------|--------------------|----|--------|----|--------|----|----------|----|------|
|                                                         |       |       |         |      |         |     | Isotope ratios |     |        |     |       | Apparent ages (Ma) |    |        |    |        |    |          |    |      |
| Grundy                                                  | Grain | U     | 206Pb   | U/Th | 206Pb*  | ±   | 207Pb*         | ±   | 206Pb* | ±   | error | 206Pb*             | ±  | 207Pb* | ±  | 206Pb* | ±  | Best age | ±  | Conc |
| Sample                                                  | No.   | (ppm) | 204Pb   |      | 207Pb*  | (%) | 235U*          | (%) | 238U   | (%) | corr. | 238U*              |    | 235U   |    | 207Pb* |    | (Ma)     |    | (%)  |
| EC17-1B                                                 | 1     | 487   | 769838  | 17.4 | 13.5161 | 0.7 | 1.7515         | 1.7 | 0.1718 | 1.5 | 0.91  | 1022               | 15 | 1028   | 11 | 1040   | 14 | 1040     | 14 | 98   |
| EC17-1B                                                 | 2     | 28    | 29638   | 1.2  | 13.3009 | 1.3 | 1.7098         | 1.7 | 0.1650 | 1.1 | 0.66  | 985                | 10 | 1012   | 11 | 1073   | 26 | 1073     | 26 | 92   |
| EC17-1B                                                 | 3     | 163   | 79496   | 2.3  | 12.6795 | 0.5 | 2.2335         | 1.2 | 0.2055 | 1.1 | 0.90  | 1205               | 12 | 1192   | 9  | 1168   | 11 | 1168     | 11 | 103  |
| EC17-1B                                                 | 4     | 120   | 131382  | 2.4  | 10.8750 | 0.7 | 3.2001         | 1.3 | 0.2525 | 1.1 | 0.86  | 1451               | 14 | 1457   | 10 | 1466   | 13 | 1466     | 13 | 99   |
| EC17-1B                                                 | 5     | 266   | 205969  | 1.6  | 12.5759 | 0.7 | 2.2041         | 1.5 | 0.2011 | 1.3 | 0.87  | 1181               | 14 | 1182   | 10 | 1184   | 14 | 1184     | 14 | 100  |
| EC17-1B                                                 | 6     | 798   | 258619  | 2.5  | 12.8650 | 0.6 | 2.1436         | 1.1 | 0.2001 | 0.9 | 0.81  | 1176               | 9  | 1163   | 7  | 1139   | 12 | 1139     | 12 | 103  |
| EC17-1B                                                 | 7     | 384   | 120647  | 3.5  | 12.1548 | 0.7 | 2.4199         | 1.4 | 0.2134 | 1.2 | 0.87  | 1247               | 14 | 1249   | 10 | 1251   | 13 | 1251     | 13 | 100  |
| EC17-1B                                                 | 8     | 781   | 178497  | 2.4  | 13.6342 | 0.7 | 1.7165         | 1.3 | 0.1698 | 1.1 | 0.86  | 1011               | 10 | 1015   | 8  | 1023   | 13 | 1023     | 13 | 99   |
| EC17-1B                                                 | 9     | 139   | 97508   | 1.5  | 11.8924 | 0.8 | 2.5678         | 1.3 | 0.2216 | 1.0 | 0.78  | 1290               | 12 | 1292   | 9  | 1294   | 16 | 1294     | 16 | 100  |
| EC17-1B                                                 | 10    | 214   | 104374  | 1.0  | 9.8825  | 0.6 | 4.0853         | 1.2 | 0.2929 | 1.0 | 0.83  | 1656               | 14 | 1651   | 10 | 1645   | 12 | 1645     | 12 | 101  |
| EC17-1B                                                 | 11    | 1007  | 186288  | 3.0  | 12.7272 | 0.6 | 2.1312         | 1.1 | 0.1968 | 0.8 | 0.80  | 1158               | 9  | 1159   | 7  | 1160   | 13 | 1160     | 13 | 100  |
| EC17-1B                                                 | 12    | 344   | 29738   | 1.3  | 13.0262 | 0.9 | 1.7941         | 1.6 | 0.1696 | 1.4 | 0.83  | 1010               | 13 | 1043   | 11 | 1114   | 18 | 1114     | 18 | 91   |
| EC17-1B                                                 | 13    | 62    | 17269   | 2.7  | 12.8685 | 1.1 | 2.0635         | 1.6 | 0.1927 | 1.2 | 0.73  | 1136               | 12 | 1137   | 11 | 1139   | 22 | 1139     | 22 | 100  |
| EC17-1B                                                 | 15    | 128   | 96799   | 3.4  | 12.6285 | 0.6 | 2.2514         | 1.3 | 0.2063 | 1.2 | 0.89  | 1209               | 13 | 1197   | 9  | 1176   | 12 | 1176     | 12 | 103  |
| EC17-1B                                                 | 16    | 483   | 229431  | 5.2  | 13.0520 | 0.6 | 1.9808         | 1.2 | 0.1876 | 1.0 | 0.86  | 1108               | 10 | 1109   | 8  | 1110   | 12 | 1110     | 12 | 100  |
| EC17-1B                                                 | 17    | 194   | 40834   | 2.9  | 13.6365 | 0.7 | 1.8114         | 1.2 | 0.1792 | 0.9 | 0.80  | 1063               | 9  | 1050   | 8  | 1022   | 14 | 1022     | 14 | 104  |
| EC17-1B                                                 | 18    | 126   | 24368   | 3.2  | 12.2784 | 0.8 | 2.2274         | 1.3 | 0.1984 | 0.9 | 0.75  | 1167               | 10 | 1190   | 9  | 1231   | 16 | 1231     | 16 | 95   |
| EC17-1B                                                 | 19    | 280   | 378474  | 1.7  | 13.5128 | 0.7 | 1.8743         | 1.4 | 0.1838 | 1.2 | 0.87  | 1088               | 12 | 1072   | 9  | 1041   | 14 | 1041     | 14 | 105  |
| EC17-1B                                                 | 21    | 277   | 68794   | 2.7  | 13.3258 | 0.7 | 1.8224         | 1.2 | 0.1762 | 0.9 | 0.80  | 1046               | 9  | 1054   | 8  | 1069   | 14 | 1069     | 14 | 98   |
| EC17-1B                                                 | 22    | 781   | 121482  | 11.6 | 13.5480 | 0.6 | 1.7706         | 1.1 | 0.1741 | 0.8 | 0.80  | 1034               | 8  | 1035   | 7  | 1035   | 13 | 1035     | 13 | 100  |
| EC17-1B                                                 | 24    | 420   | 132760  | 1.5  | 12.7773 | 0.8 | 2.0408         | 1.5 | 0.1892 | 1.2 | 0.83  | 1117               | 12 | 1129   | 10 | 1153   | 16 | 1153     | 16 | 97   |
| EC17-1B                                                 | 25    | 185   | 62664   | 3.0  | 13.2451 | 0.9 | 1.8359         | 1.4 | 0.1764 | 1.0 | 0.77  | 1047               | 10 | 1058   | 9  | 1081   | 18 | 1081     | 18 | 97   |
| EC17-1B                                                 | 26    | 135   | 308395  | 1.4  | 13.4286 | 0.8 | 1.8691         | 1.5 | 0.1821 | 1.2 | 0.84  | 1079               | 12 | 1070   | 10 | 1053   | 16 | 1053     | 16 | 102  |
| EC17-1B                                                 | 27    | 55    | 11239   | 2.1  | 13.4474 | 1.0 | 1.7366         | 1.5 | 0.1694 | 1.0 | 0.71  | 1009               | 10 | 1022   | 10 | 1051   | 21 | 1051     | 21 | 96   |
| EC17-1B                                                 | 28    | 160   | 77256   | 2.1  | 10.9999 | 0.7 | 3.2025         | 1.2 | 0.2556 | 1.0 | 0.82  | 1467               | 13 | 1458   | 10 | 1444   | 13 | 1444     | 13 | 102  |
| EC17-1B                                                 | 29    | 189   | 86019   | 3.8  | 13.6066 | 0.6 | 1.7593         | 1.3 | 0.1737 | 1.2 | 0.89  | 1032               | 11 | 1031   | 9  | 1027   | 12 | 1027     | 12 | 101  |
| EC17-1B                                                 | 30    | 201   | 63298   | 2.0  | 9.4308  | 0.5 | 4.4269         | 1.3 | 0.3029 | 1.1 | 0.90  | 1706               | 17 | 1717   | 10 | 1732   | 10 | 1732     | 10 | 99   |
| EC17-1B                                                 | 32    | 98    | 566888  | 2.4  | 13.6302 | 0.9 | 1.7422         | 1.3 | 0.1723 | 1.0 | 0.75  | 1025               | 9  | 1024   | 8  | 1023   | 17 | 1023     | 17 | 100  |
| EC17-1B                                                 | 33    | 38    | 271963  | 4.0  | 11.0825 | 0.7 | 3.1178         | 1.4 | 0.2507 | 1.2 | 0.88  | 1442               | 16 | 1437   | 11 | 1430   | 13 | 1430     | 13 | 101  |
| EC17-1B                                                 | 34    | 66    | 57606   | 5.1  | 12.2546 | 0.9 | 2.3529         | 1.5 | 0.2092 | 1.3 | 0.83  | 1225               | 14 | 1228   | 11 | 1235   | 17 | 1235     | 17 | 99   |
| EC17-1B                                                 | 35    | 189   | 161492  | 3.7  | 12.5723 | 0.7 | 2.1685         | 1.3 | 0.1978 | 1.0 | 0.83  | 1164               | 11 | 1171   | 9  | 1185   | 14 | 1185     | 14 | 98   |
| EC17-1B                                                 | 36    | 77    | 52611   | 1.3  | 13.1720 | 0.9 | 1.8861         | 1.6 | 0.1803 | 1.4 | 0.84  | 1068               | 14 | 1076   | 11 | 1092   | 18 | 1092     | 18 | 98   |
| EC17-1B                                                 | 37    | 185   | 74095   | 2.8  | 12.2507 | 0.7 | 2.3360         | 1.2 | 0.2076 | 1.1 | 0.85  | 1216               | 12 | 1223   | 9  | 1236   | 13 | 1236     | 13 | 98   |
| EC17-1B                                                 | 38    | 515   | 1698175 | 2.7  | 13.3885 | 0.8 | 1.8564         | 1.4 | 0.1803 | 1.1 | 0.83  | 1069               | 11 | 1066   | 9  | 1059   | 15 | 1059     | 15 | 101  |
| EC17-1B                                                 | 39    | 433   | 104551  | 4.6  | 13.5715 | 0.5 | 1.7265         | 1.1 | 0.1700 | 1.0 | 0.88  | 1012               | 9  | 1018   | 7  | 1032   | 11 | 1032     | 11 | 98   |
| EC17-1B                                                 | 40    | 238   | 645893  | 3.1  | 11.6320 | 0.7 | 2.7007         | 1.4 | 0.2279 | 1.2 | 0.87  | 1324               | 15 | 1329   | 10 | 1337   | 14 | 1337     | 14 | 99   |
| EC17-1B                                                 | 41    | 132   | 29153   | 2.5  | 13.6645 | 0.7 | 1.7153         | 1.2 | 0.1701 | 1.0 | 0.81  | 1012               | 9  | 1014   | 8  | 1018   | 14 | 1018     | 14 | 99   |
| EC17-1B                                                 | 42    | 387   | 46264   | 6.2  | 12.8482 | 0.9 | 1.9466         | 1.4 | 0.1815 | 1.1 | 0.78  | 1075               | 11 | 1097   | 9  | 1142   | 17 | 1142     | 17 | 94   |
| EC17-1B                                                 | 43    | 145   | 60399   | 1.8  | 13.9484 | 0.9 | 1.5784         | 1.5 | 0.1597 | 1.1 | 0.78  | 955                | 10 | 962    | 9  | 976    | 19 | 976      | 19 | 98   |
| EC17-1B                                                 | 44    | 309   | 266703  | 1.4  | 10.9011 | 0.6 | 3.2389         | 1.2 | 0.2562 | 1.0 | 0.86  | 1470               | 13 | 1467   | 9  | 1461   | 12 | 1461     | 12 | 101  |
| EC17-1B                                                 | 45    | 95    | 86372   | 4.0  | 13.5170 | 0.7 | 1.7213         | 1.2 | 0.1688 | 1.0 | 0.80  | 1006               | 9  | 1017   | 8  | 1040   | 14 | 1040     | 14 | 97   |
| EC17-1B                                                 | 46    | 171   | 30779   | 1.7  | 12.8246 | 0.7 | 1.9055         | 1.4 | 0.1773 | 1.2 | 0.86  | 1052               | 12 | 1083   | 9  | 1145   | 14 | 1145     | 14 | 92   |

|         |    |      |          |      |         |     |        |     |        |     |      |      |    |      |    |      |    |      |    |     |
|---------|----|------|----------|------|---------|-----|--------|-----|--------|-----|------|------|----|------|----|------|----|------|----|-----|
| EC17-1B | 47 | 443  | 874200   | 1.7  | 12.5672 | 0.7 | 2.2441 | 1.4 | 0.2046 | 1.2 | 0.86 | 1200 | 13 | 1195 | 10 | 1186 | 14 | 1186 | 14 | 101 |
| EC17-1B | 48 | 529  | 446974   | 1.7  | 11.0272 | 0.6 | 3.0882 | 1.2 | 0.2471 | 1.1 | 0.87 | 1423 | 14 | 1430 | 9  | 1439 | 12 | 1439 | 12 | 99  |
| EC17-1B | 49 | 192  | 3312246  | 2.0  | 13.8031 | 0.8 | 1.6098 | 1.3 | 0.1612 | 1.1 | 0.81 | 964  | 10 | 974  | 8  | 998  | 16 | 998  | 16 | 97  |
| EC17-1B | 50 | 738  | 135179   | 6.9  | 13.0260 | 0.5 | 1.8777 | 1.1 | 0.1775 | 1.0 | 0.87 | 1053 | 9  | 1073 | 7  | 1114 | 11 | 1114 | 11 | 95  |
| EC17-1B | 51 | 92   | 82592    | 1.1  | 13.3364 | 0.8 | 1.8066 | 1.5 | 0.1748 | 1.2 | 0.83 | 1039 | 12 | 1048 | 10 | 1067 | 17 | 1067 | 17 | 97  |
| EC17-1B | 53 | 266  | 256580   | 1.8  | 13.7551 | 0.7 | 1.6610 | 1.2 | 0.1658 | 0.9 | 0.79 | 989  | 9  | 994  | 8  | 1005 | 15 | 1005 | 15 | 98  |
| EC17-1B | 54 | 610  | 184570   | 4.3  | 12.7917 | 0.6 | 2.1252 | 1.1 | 0.1972 | 0.8 | 0.79 | 1161 | 9  | 1157 | 7  | 1150 | 13 | 1150 | 13 | 101 |
| EC17-1B | 56 | 95   | 191247   | 1.3  | 13.2337 | 0.8 | 1.8673 | 1.2 | 0.1793 | 0.9 | 0.78 | 1063 | 9  | 1070 | 8  | 1083 | 15 | 1083 | 15 | 98  |
| EC17-1B | 57 | 991  | 94084    | 3.2  | 13.5865 | 0.6 | 1.6659 | 1.0 | 0.1642 | 0.8 | 0.80 | 980  | 7  | 996  | 6  | 1030 | 12 | 1030 | 12 | 95  |
| EC17-1B | 58 | 309  | 239931   | 2.3  | 12.6749 | 0.7 | 2.0877 | 1.2 | 0.1920 | 0.9 | 0.81 | 1132 | 10 | 1145 | 8  | 1169 | 14 | 1169 | 14 | 97  |
| EC17-1B | 59 | 547  | 362997   | 5.0  | 13.3914 | 0.6 | 1.8206 | 1.1 | 0.1769 | 0.9 | 0.85 | 1050 | 9  | 1053 | 7  | 1059 | 11 | 1059 | 11 | 99  |
| EC17-1B | 60 | 428  | 307670   | 5.8  | 12.6733 | 0.7 | 2.1430 | 1.1 | 0.1971 | 0.8 | 0.76 | 1160 | 9  | 1163 | 8  | 1169 | 14 | 1169 | 14 | 99  |
| EC17-1B | 61 | 164  | 28999    | 2.9  | 10.3861 | 1.2 | 3.3271 | 1.7 | 0.2507 | 1.2 | 0.72 | 1442 | 16 | 1487 | 13 | 1552 | 22 | 1552 | 22 | 93  |
| EC17-1B | 62 | 243  | 270272   | 1.8  | 11.4287 | 0.8 | 2.5917 | 1.5 | 0.2149 | 1.3 | 0.84 | 1255 | 15 | 1298 | 11 | 1371 | 16 | 1371 | 16 | 92  |
| EC17-1B | 63 | 618  | 1002682  | 4.9  | 13.5541 | 0.6 | 1.6987 | 1.1 | 0.1671 | 1.0 | 0.87 | 996  | 9  | 1008 | 7  | 1035 | 12 | 1035 | 12 | 96  |
| EC17-1B | 64 | 276  | 585698   | 1.4  | 12.7044 | 0.6 | 2.1091 | 1.1 | 0.1944 | 0.9 | 0.84 | 1145 | 10 | 1152 | 8  | 1164 | 12 | 1164 | 12 | 98  |
| EC17-1B | 65 | 1147 | 105205   | 5.8  | 13.4901 | 0.7 | 1.7931 | 1.1 | 0.1755 | 0.9 | 0.76 | 1042 | 8  | 1043 | 7  | 1044 | 15 | 1044 | 15 | 100 |
| EC17-1B | 66 | 143  | 50633    | 3.8  | 13.7020 | 0.8 | 1.7110 | 1.2 | 0.1701 | 0.9 | 0.76 | 1013 | 8  | 1013 | 8  | 1013 | 16 | 1013 | 16 | 100 |
| EC17-1B | 67 | 310  | 98276    | 3.9  | 13.5057 | 0.6 | 1.7491 | 0.9 | 0.1714 | 0.7 | 0.74 | 1020 | 6  | 1027 | 6  | 1042 | 12 | 1042 | 12 | 98  |
| EC17-1B | 68 | 64   | 28519    | 1.3  | 13.3245 | 0.9 | 1.8736 | 1.3 | 0.1811 | 1.0 | 0.75 | 1073 | 10 | 1072 | 9  | 1069 | 17 | 1069 | 17 | 100 |
| EC17-1B | 69 | 344  | 95027    | 2.8  | 13.3854 | 0.7 | 1.7378 | 1.2 | 0.1688 | 1.0 | 0.83 | 1005 | 9  | 1023 | 8  | 1060 | 14 | 1060 | 14 | 95  |
| EC17-1B | 70 | 361  | 82308    | 4.0  | 13.7373 | 0.6 | 1.6622 | 1.2 | 0.1657 | 1.1 | 0.86 | 988  | 10 | 994  | 8  | 1007 | 13 | 1007 | 13 | 98  |
| EC17-1B | 71 | 122  | 98441    | 5.1  | 13.8487 | 0.7 | 1.6446 | 1.0 | 0.1653 | 0.7 | 0.72 | 986  | 7  | 987  | 6  | 991  | 14 | 991  | 14 | 99  |
| EC17-1B | 72 | 273  | 150933   | 3.7  | 13.2144 | 0.6 | 1.9577 | 1.3 | 0.1877 | 1.1 | 0.87 | 1109 | 11 | 1101 | 8  | 1086 | 12 | 1086 | 12 | 102 |
| EC17-1B | 73 | 238  | 11177856 | 0.9  | 13.3432 | 0.6 | 1.8166 | 1.2 | 0.1759 | 1.1 | 0.85 | 1044 | 10 | 1051 | 8  | 1066 | 13 | 1066 | 13 | 98  |
| EC17-1B | 74 | 190  | 194237   | 1.2  | 11.8735 | 0.6 | 2.4171 | 1.3 | 0.2082 | 1.1 | 0.88 | 1219 | 13 | 1248 | 9  | 1297 | 12 | 1297 | 12 | 94  |
| EC17-1B | 75 | 243  | 109245   | 2.3  | 11.7851 | 0.7 | 2.5490 | 1.2 | 0.2180 | 1.0 | 0.84 | 1271 | 12 | 1286 | 9  | 1311 | 13 | 1311 | 13 | 97  |
| EC17-1B | 76 | 154  | 42433    | 3.1  | 12.2070 | 0.6 | 2.3163 | 1.2 | 0.2052 | 1.0 | 0.84 | 1203 | 11 | 1217 | 8  | 1243 | 12 | 1243 | 12 | 97  |
| EC17-1B | 77 | 425  | 480773   | 2.1  | 13.3972 | 0.6 | 1.8511 | 1.2 | 0.1799 | 1.0 | 0.88 | 1067 | 10 | 1064 | 8  | 1058 | 11 | 1058 | 11 | 101 |
| EC17-1B | 78 | 347  | 176520   | 2.0  | 12.1271 | 0.5 | 2.4730 | 1.0 | 0.2176 | 0.9 | 0.88 | 1269 | 10 | 1264 | 7  | 1256 | 10 | 1256 | 10 | 101 |
| EC17-1B | 79 | 133  | 466318   | 3.8  | 14.2850 | 0.6 | 1.4702 | 1.2 | 0.1524 | 1.0 | 0.87 | 914  | 9  | 918  | 7  | 928  | 12 | 928  | 12 | 99  |
| EC17-1B | 80 | 581  | 702143   | 0.9  | 12.6702 | 0.5 | 2.2031 | 1.1 | 0.2025 | 1.0 | 0.88 | 1189 | 10 | 1182 | 8  | 1169 | 10 | 1169 | 10 | 102 |
| EC17-1B | 81 | 59   | 64867    | 2.5  | 13.2147 | 0.8 | 1.7995 | 1.0 | 0.1725 | 0.7 | 0.68 | 1026 | 7  | 1045 | 7  | 1086 | 15 | 1086 | 15 | 95  |
| EC17-1B | 82 | 292  | 110756   | 4.5  | 13.7001 | 0.7 | 1.6707 | 1.4 | 0.1661 | 1.2 | 0.86 | 990  | 11 | 997  | 9  | 1013 | 15 | 1013 | 15 | 98  |
| EC17-1B | 83 | 81   | 78115    | 2.4  | 13.4107 | 0.9 | 1.8029 | 1.1 | 0.1754 | 0.6 | 0.58 | 1042 | 6  | 1047 | 7  | 1056 | 18 | 1056 | 18 | 99  |
| EC17-1B | 84 | 945  | 90065    | 10.4 | 13.1083 | 0.6 | 1.9973 | 1.2 | 0.1900 | 1.1 | 0.88 | 1121 | 11 | 1115 | 8  | 1102 | 12 | 1102 | 12 | 102 |
| EC17-1B | 85 | 283  | 229812   | 4.1  | 13.4723 | 0.6 | 1.8514 | 0.9 | 0.1810 | 0.7 | 0.71 | 1072 | 6  | 1064 | 6  | 1047 | 13 | 1047 | 13 | 102 |
| EC17-1B | 86 | 1313 | 2372592  | 78.2 | 12.7163 | 0.7 | 2.1613 | 1.0 | 0.1994 | 0.8 | 0.75 | 1172 | 8  | 1169 | 7  | 1162 | 13 | 1162 | 13 | 101 |
| EC17-1B | 87 | 292  | 97394    | 3.3  | 14.0059 | 0.5 | 1.5584 | 1.2 | 0.1584 | 1.0 | 0.88 | 948  | 9  | 954  | 7  | 968  | 11 | 968  | 11 | 98  |
| EC17-1B | 88 | 173  | 102633   | 1.5  | 13.4231 | 0.8 | 1.8247 | 2.0 | 0.1777 | 1.9 | 0.92 | 1054 | 18 | 1054 | 13 | 1054 | 16 | 1054 | 16 | 100 |
| EC17-1B | 89 | 805  | 1997483  | 2.3  | 17.0698 | 0.7 | 0.7163 | 1.2 | 0.0887 | 1.0 | 0.82 | 548  | 5  | 549  | 5  | 551  | 15 | 548  | 5  | 100 |
| EC17-1B | 90 | 297  | 102406   | 2.6  | 12.9612 | 0.7 | 2.0415 | 1.2 | 0.1920 | 1.0 | 0.84 | 1132 | 11 | 1129 | 8  | 1124 | 13 | 1124 | 13 | 101 |
| EC17-1B | 91 | 99   | 466721   | 1.8  | 12.6120 | 0.8 | 2.0953 | 1.1 | 0.1917 | 0.8 | 0.73 | 1131 | 8  | 1147 | 8  | 1179 | 15 | 1179 | 15 | 96  |
| EC17-1B | 92 | 33   | 12964    | 0.5  | 12.3006 | 1.3 | 2.0299 | 1.9 | 0.1812 | 1.4 | 0.71 | 1073 | 13 | 1126 | 13 | 1228 | 26 | 1228 | 26 | 87  |
| EC17-1B | 93 | 134  | 39097    | 2.1  | 13.4755 | 0.7 | 1.8069 | 1.7 | 0.1767 | 1.6 | 0.92 | 1049 | 15 | 1048 | 11 | 1046 | 13 | 1046 | 13 | 100 |
| EC17-1B | 94 | 153  | 123243   | 2.3  | 13.2332 | 0.7 | 1.8614 | 1.5 | 0.1787 | 1.4 | 0.88 | 1060 | 13 | 1067 | 10 | 1083 | 15 | 1083 | 15 | 98  |

|         |     |      |         |       |         |     |         |     |        |     |      |      |    |      |    |      |    |      |    |     |
|---------|-----|------|---------|-------|---------|-----|---------|-----|--------|-----|------|------|----|------|----|------|----|------|----|-----|
| EC17-1B | 95  | 60   | 56043   | 2.7   | 11.3664 | 0.9 | 2.7878  | 1.4 | 0.2299 | 1.0 | 0.74 | 1334 | 12 | 1352 | 10 | 1381 | 17 | 1381 | 17 | 97  |
| EC17-1B | 96  | 453  | 366850  | 1.9   | 12.6995 | 0.6 | 2.0660  | 1.3 | 0.1904 | 1.1 | 0.87 | 1123 | 11 | 1138 | 9  | 1165 | 12 | 1165 | 12 | 96  |
| EC17-1B | 97  | 108  | 115563  | 3.7   | 11.0702 | 0.7 | 3.0753  | 1.3 | 0.2470 | 1.1 | 0.85 | 1423 | 14 | 1427 | 10 | 1432 | 13 | 1432 | 13 | 99  |
| EC17-1B | 99  | 182  | 43715   | 2.5   | 12.7186 | 0.7 | 2.0546  | 1.3 | 0.1896 | 1.1 | 0.82 | 1119 | 11 | 1134 | 9  | 1162 | 15 | 1162 | 15 | 96  |
| EC17-1B | 100 | 186  | 70909   | 3.6   | 13.5475 | 0.7 | 1.7591  | 1.3 | 0.1729 | 1.1 | 0.86 | 1028 | 10 | 1031 | 8  | 1035 | 13 | 1035 | 13 | 99  |
| EC17-1B | 101 | 125  | 93677   | 2.7   | 13.8143 | 0.8 | 1.6699  | 1.1 | 0.1674 | 0.8 | 0.72 | 998  | 8  | 997  | 7  | 996  | 16 | 996  | 16 | 100 |
| EC17-1B | 102 | 191  | 109683  | 3.2   | 10.9169 | 0.5 | 3.1939  | 1.1 | 0.2530 | 1.0 | 0.88 | 1454 | 13 | 1456 | 9  | 1458 | 10 | 1458 | 10 | 100 |
| EC17-1B | 103 | 187  | 193302  | 1.9   | 13.3056 | 0.7 | 1.8115  | 1.4 | 0.1749 | 1.2 | 0.85 | 1039 | 11 | 1050 | 9  | 1072 | 15 | 1072 | 15 | 97  |
| EC17-1B | 104 | 838  | 596464  | 3.9   | 13.4869 | 0.5 | 1.7810  | 1.3 | 0.1743 | 1.2 | 0.92 | 1036 | 12 | 1039 | 8  | 1045 | 10 | 1045 | 10 | 99  |
| EC17-1B | 105 | 443  | 172256  | 2.2   | 11.8103 | 0.7 | 2.6169  | 1.1 | 0.2242 | 0.9 | 0.81 | 1304 | 11 | 1305 | 8  | 1307 | 13 | 1307 | 13 | 100 |
| EC17-1B | 106 | 266  | 134310  | 2.0   | 12.7214 | 0.8 | 2.1334  | 1.6 | 0.1969 | 1.4 | 0.86 | 1159 | 14 | 1160 | 11 | 1161 | 16 | 1161 | 16 | 100 |
| EC17-1B | 107 | 127  | 114575  | 2.0   | 12.7965 | 0.9 | 2.1319  | 1.4 | 0.1979 | 1.0 | 0.74 | 1164 | 11 | 1159 | 9  | 1150 | 18 | 1150 | 18 | 101 |
| EC17-1B | 109 | 248  | 117949  | 2.3   | 12.0082 | 0.7 | 2.5535  | 1.3 | 0.2225 | 1.1 | 0.85 | 1295 | 13 | 1287 | 9  | 1275 | 13 | 1275 | 13 | 102 |
| EC17-1B | 110 | 831  | 158474  | 2.0   | 12.9637 | 0.6 | 1.9218  | 1.2 | 0.1808 | 1.1 | 0.88 | 1071 | 11 | 1089 | 8  | 1124 | 11 | 1124 | 11 | 95  |
| EC17-1B | 111 | 174  | 1061296 | 3.4   | 13.5143 | 0.7 | 1.8344  | 1.3 | 0.1799 | 1.1 | 0.82 | 1066 | 10 | 1058 | 9  | 1040 | 15 | 1040 | 15 | 102 |
| EC17-1B | 112 | 151  | 79672   | 3.6   | 13.2828 | 0.8 | 1.8971  | 1.4 | 0.1828 | 1.2 | 0.84 | 1082 | 12 | 1080 | 9  | 1075 | 15 | 1075 | 15 | 101 |
| EC17-1B | 113 | 242  | 145266  | 3.6   | 13.5399 | 0.5 | 1.7833  | 1.1 | 0.1752 | 1.0 | 0.88 | 1041 | 9  | 1039 | 7  | 1037 | 11 | 1037 | 11 | 100 |
| EC17-1B | 114 | 172  | 801072  | 3.1   | 12.6532 | 0.6 | 2.2352  | 1.0 | 0.2052 | 0.8 | 0.80 | 1203 | 8  | 1192 | 7  | 1172 | 11 | 1172 | 11 | 103 |
| EC17-1B | 115 | 297  | 1165280 | 1.5   | 11.7273 | 0.5 | 2.5625  | 1.1 | 0.2181 | 0.9 | 0.88 | 1272 | 11 | 1290 | 8  | 1321 | 10 | 1321 | 10 | 96  |
| EC17-1B | 116 | 138  | 223792  | 1.0   | 13.6298 | 0.7 | 1.7569  | 1.2 | 0.1737 | 1.0 | 0.83 | 1033 | 10 | 1030 | 8  | 1023 | 14 | 1023 | 14 | 101 |
| EC17-1B | 117 | 217  | 291781  | 1.8   | 13.4428 | 0.8 | 1.8152  | 1.3 | 0.1770 | 1.0 | 0.79 | 1051 | 10 | 1051 | 8  | 1051 | 16 | 1051 | 16 | 100 |
| EC17-1B | 118 | 100  | 126216  | 2.9   | 13.0796 | 0.8 | 1.8392  | 1.1 | 0.1745 | 0.8 | 0.71 | 1037 | 8  | 1060 | 7  | 1106 | 16 | 1106 | 16 | 94  |
| EC17-1B | 119 | 87   | 107332  | 2.9   | 10.4600 | 0.6 | 3.4857  | 1.2 | 0.2645 | 1.0 | 0.83 | 1513 | 13 | 1524 | 9  | 1539 | 12 | 1539 | 12 | 98  |
| EC17-1B | 120 | 62   | 41915   | 3.0   | 13.1600 | 1.0 | 1.8247  | 1.3 | 0.1742 | 0.9 | 0.66 | 1035 | 8  | 1054 | 9  | 1094 | 20 | 1094 | 20 | 95  |
| EC17-1B | 121 | 59   | 33024   | 1.0   | 13.4633 | 0.8 | 1.8057  | 1.4 | 0.1764 | 1.1 | 0.80 | 1047 | 11 | 1048 | 9  | 1048 | 17 | 1048 | 17 | 100 |
| EC17-1B | 122 | 23   | 20688   | 3.1   | 12.2277 | 1.1 | 1.8812  | 1.6 | 0.1669 | 1.2 | 0.75 | 995  | 11 | 1074 | 11 | 1239 | 21 | 1239 | 21 | 80  |
| EC17-1B | 123 | 135  | 423445  | 3.3   | 11.4765 | 0.7 | 2.8268  | 1.5 | 0.2354 | 1.3 | 0.88 | 1363 | 16 | 1363 | 11 | 1363 | 13 | 1363 | 13 | 100 |
| EC17-1B | 124 | 60   | 372586  | 4.2   | 13.1610 | 1.0 | 1.8886  | 1.6 | 0.1804 | 1.3 | 0.80 | 1069 | 13 | 1077 | 11 | 1094 | 20 | 1094 | 20 | 98  |
| EC17-1B | 125 | 485  | 68449   | 2.2   | 12.0147 | 0.6 | 2.3060  | 1.3 | 0.2010 | 1.2 | 0.89 | 1181 | 13 | 1214 | 10 | 1274 | 12 | 1274 | 12 | 93  |
| EC17-1B | 126 | 198  | 98623   | 2.7   | 13.7818 | 0.7 | 1.6656  | 1.4 | 0.1666 | 1.2 | 0.84 | 993  | 11 | 995  | 9  | 1001 | 15 | 1001 | 15 | 99  |
| EC17-1B | 127 | 113  | 49118   | 1.3   | 12.6491 | 0.6 | 2.1690  | 1.1 | 0.1991 | 1.0 | 0.84 | 1170 | 10 | 1171 | 8  | 1173 | 12 | 1173 | 12 | 100 |
| EC17-1B | 128 | 130  | 217539  | 2.3   | 12.6828 | 0.6 | 2.0937  | 1.1 | 0.1927 | 1.0 | 0.84 | 1136 | 10 | 1147 | 8  | 1167 | 12 | 1167 | 12 | 97  |
| EC17-1B | 129 | 208  | 37202   | 2.6   | 13.2582 | 0.7 | 1.8824  | 1.3 | 0.1811 | 1.1 | 0.84 | 1073 | 11 | 1075 | 9  | 1079 | 14 | 1079 | 14 | 99  |
| EC17-1B | 130 | 737  | 83284   | 2.9   | 11.8259 | 0.7 | 2.5810  | 1.4 | 0.2215 | 1.1 | 0.84 | 1290 | 13 | 1295 | 10 | 1305 | 14 | 1305 | 14 | 99  |
| EC17-1B | 132 | 528  | 348002  | 4.2   | 13.4517 | 0.7 | 1.8489  | 1.1 | 0.1805 | 0.9 | 0.80 | 1069 | 9  | 1063 | 7  | 1050 | 14 | 1050 | 14 | 102 |
| EC17-1B | 133 | 652  | 222220  | 106.6 | 13.5297 | 0.6 | 1.7929  | 0.9 | 0.1760 | 0.8 | 0.81 | 1045 | 7  | 1043 | 6  | 1038 | 11 | 1038 | 11 | 101 |
| EC17-1B | 134 | 103  | 33437   | 3.2   | 13.2255 | 0.7 | 1.8529  | 1.2 | 0.1778 | 1.0 | 0.82 | 1055 | 10 | 1064 | 8  | 1084 | 14 | 1084 | 14 | 97  |
| EC17-1B | 135 | 70   | 117386  | 1.9   | 13.5547 | 0.8 | 1.8127  | 1.4 | 0.1783 | 1.2 | 0.84 | 1058 | 12 | 1050 | 9  | 1034 | 16 | 1034 | 16 | 102 |
| EC17-1B | 136 | 122  | 86079   | 1.9   | 13.4233 | 0.8 | 1.9190  | 1.4 | 0.1869 | 1.2 | 0.82 | 1105 | 12 | 1088 | 9  | 1054 | 16 | 1054 | 16 | 105 |
| EC17-1B | 137 | 289  | 114084  | 3.5   | 13.2684 | 0.5 | 1.8664  | 1.1 | 0.1797 | 0.9 | 0.87 | 1065 | 9  | 1069 | 7  | 1077 | 11 | 1077 | 11 | 99  |
| EC17-1B | 138 | 92   | 244793  | 1.5   | 5.3759  | 0.5 | 13.4618 | 1.3 | 0.5251 | 1.2 | 0.91 | 2721 | 26 | 2713 | 12 | 2707 | 9  | 2707 | 9  | 101 |
| EC17-1B | 139 | 124  | 47720   | 2.0   | 12.6414 | 0.7 | 2.1644  | 1.2 | 0.1985 | 0.9 | 0.80 | 1167 | 10 | 1170 | 8  | 1174 | 14 | 1174 | 14 | 99  |
| EC17-1B | 140 | 558  | 1513585 | 1.5   | 12.8880 | 0.6 | 1.7855  | 1.8 | 0.1670 | 1.7 | 0.93 | 995  | 16 | 1040 | 12 | 1136 | 13 | 1136 | 13 | 88  |
| EC17-1B | 141 | 507  | 302966  | 4.9   | 12.9773 | 0.6 | 2.0404  | 0.9 | 0.1921 | 0.7 | 0.77 | 1133 | 8  | 1129 | 6  | 1122 | 12 | 1122 | 12 | 101 |
| EC17-1B | 142 | 49   | 43614   | 3.9   | 13.0209 | 1.0 | 1.6766  | 1.3 | 0.1584 | 0.8 | 0.61 | 948  | 7  | 1000 | 8  | 1115 | 21 | 1115 | 21 | 85  |
| EC17-1B | 143 | 1062 | 1217084 | 4.9   | 13.5178 | 0.5 | 1.8483  | 1.1 | 0.1813 | 0.9 | 0.86 | 1074 | 9  | 1063 | 7  | 1040 | 11 | 1040 | 11 | 103 |

|         |     |     |          |      |         |     |        |     |        |     |      |      |    |      |    |      |    |      |    |     |
|---------|-----|-----|----------|------|---------|-----|--------|-----|--------|-----|------|------|----|------|----|------|----|------|----|-----|
| EC17-1B | 144 | 75  | 59313    | 1.8  | 12.8294 | 0.9 | 2.1506 | 1.5 | 0.2002 | 1.1 | 0.77 | 1176 | 12 | 1165 | 10 | 1145 | 18 | 1145 | 18 | 103 |
| EC17-1B | 145 | 353 | 839925   | 5.1  | 13.1487 | 0.6 | 1.8827 | 1.2 | 0.1796 | 1.0 | 0.84 | 1065 | 10 | 1075 | 8  | 1096 | 13 | 1096 | 13 | 97  |
| EC17-1B | 147 | 893 | 276555   | 2.3  | 13.3117 | 0.7 | 1.8690 | 1.2 | 0.1805 | 1.0 | 0.83 | 1070 | 10 | 1070 | 8  | 1071 | 13 | 1071 | 13 | 100 |
| EC17-1B | 148 | 336 | 810056   | 8.6  | 13.6217 | 0.6 | 1.7423 | 1.1 | 0.1722 | 0.9 | 0.81 | 1024 | 8  | 1024 | 7  | 1024 | 13 | 1024 | 13 | 100 |
| EC17-1B | 149 | 132 | 179772   | 1.7  | 16.8588 | 1.1 | 0.7198 | 1.5 | 0.0881 | 1.0 | 0.70 | 544  | 5  | 551  | 6  | 578  | 23 | 544  | 5  | 94  |
| EC17-1B | 150 | 399 | 861141   | 1.8  | 10.5062 | 0.7 | 3.4474 | 1.3 | 0.2628 | 1.1 | 0.86 | 1504 | 15 | 1515 | 10 | 1531 | 12 | 1531 | 12 | 98  |
| EC17-1B | 151 | 105 | 4314947  | 1.7  | 12.7460 | 0.7 | 2.1121 | 1.1 | 0.1953 | 0.9 | 0.77 | 1150 | 9  | 1153 | 8  | 1158 | 14 | 1158 | 14 | 99  |
| EC17-1B | 152 | 28  | 27154    | 1.2  | 13.7430 | 0.9 | 1.6373 | 1.4 | 0.1633 | 1.1 | 0.75 | 975  | 10 | 985  | 9  | 1007 | 19 | 1007 | 19 | 97  |
| EC17-1B | 154 | 595 | 501635   | 3.4  | 13.0293 | 0.8 | 1.9561 | 1.2 | 0.1849 | 0.9 | 0.73 | 1094 | 9  | 1101 | 8  | 1114 | 17 | 1114 | 17 | 98  |
| EC17-1B | 155 | 73  | 285231   | 2.9  | 11.8233 | 0.8 | 2.5997 | 1.2 | 0.2230 | 1.0 | 0.78 | 1298 | 11 | 1301 | 9  | 1305 | 15 | 1305 | 15 | 99  |
| EC17-1B | 157 | 284 | 212261   | 2.4  | 13.6385 | 0.6 | 1.7618 | 1.1 | 0.1743 | 0.9 | 0.81 | 1036 | 8  | 1032 | 7  | 1022 | 13 | 1022 | 13 | 101 |
| EC17-1B | 158 | 285 | 111891   | 2.9  | 11.5718 | 0.7 | 2.6504 | 1.5 | 0.2225 | 1.3 | 0.87 | 1295 | 15 | 1315 | 11 | 1347 | 14 | 1347 | 14 | 96  |
| EC17-1B | 159 | 293 | 146201   | 2.0  | 12.4417 | 0.6 | 2.3120 | 1.3 | 0.2087 | 1.2 | 0.90 | 1222 | 13 | 1216 | 9  | 1205 | 11 | 1205 | 11 | 101 |
| EC17-1B | 160 | 278 | 437315   | 3.3  | 13.1697 | 0.7 | 1.8743 | 1.3 | 0.1791 | 1.1 | 0.82 | 1062 | 10 | 1072 | 9  | 1092 | 15 | 1092 | 15 | 97  |
| EC17-1B | 161 | 92  | 30491    | 2.0  | 13.5867 | 0.8 | 1.7229 | 1.3 | 0.1698 | 1.0 | 0.80 | 1011 | 9  | 1017 | 8  | 1030 | 15 | 1030 | 15 | 98  |
| EC17-1B | 162 | 216 | 51183    | 1.5  | 13.6512 | 0.7 | 1.6984 | 1.2 | 0.1682 | 1.0 | 0.83 | 1002 | 9  | 1008 | 7  | 1020 | 13 | 1020 | 13 | 98  |
| EC17-1B | 163 | 19  | 44917    | 1.9  | 12.4377 | 1.4 | 2.2005 | 1.7 | 0.1986 | 1.0 | 0.60 | 1168 | 11 | 1181 | 12 | 1206 | 27 | 1206 | 27 | 97  |
| EC17-1B | 164 | 121 | 104711   | 2.7  | 10.8362 | 0.7 | 3.0520 | 1.2 | 0.2400 | 1.0 | 0.80 | 1387 | 12 | 1421 | 9  | 1472 | 14 | 1472 | 14 | 94  |
| EC17-1B | 165 | 152 | 108668   | 1.9  | 11.8055 | 0.5 | 2.6239 | 0.9 | 0.2248 | 0.7 | 0.80 | 1307 | 8  | 1307 | 6  | 1308 | 10 | 1308 | 10 | 100 |
| EC17-1B | 166 | 471 | 55780531 | 3.4  | 12.5038 | 0.5 | 2.2276 | 1.2 | 0.2021 | 1.0 | 0.89 | 1187 | 11 | 1190 | 8  | 1196 | 10 | 1196 | 10 | 99  |
| EC17-1B | 167 | 390 | 96332    | 1.5  | 17.8279 | 0.8 | 0.5453 | 1.3 | 0.0705 | 1.0 | 0.80 | 439  | 4  | 442  | 5  | 455  | 17 | 439  | 4  | 97  |
| EC17-1B | 168 | 521 | 169019   | 0.8  | 13.6213 | 0.6 | 1.6805 | 1.3 | 0.1661 | 1.1 | 0.87 | 991  | 11 | 1001 | 8  | 1025 | 13 | 1025 | 13 | 97  |
| EC17-1B | 169 | 207 | 619779   | 3.4  | 13.4107 | 0.7 | 1.8322 | 1.2 | 0.1783 | 0.9 | 0.82 | 1058 | 9  | 1057 | 8  | 1056 | 14 | 1056 | 14 | 100 |
| EC17-1B | 170 | 113 | 66197    | 1.2  | 9.2435  | 0.7 | 4.5893 | 1.1 | 0.3078 | 0.9 | 0.80 | 1730 | 13 | 1747 | 9  | 1768 | 12 | 1768 | 12 | 98  |
| EC17-1B | 171 | 257 | 491860   | 2.6  | 12.5919 | 0.5 | 2.1239 | 0.9 | 0.1941 | 0.8 | 0.82 | 1143 | 8  | 1157 | 6  | 1182 | 10 | 1182 | 10 | 97  |
| EC17-1B | 172 | 141 | 41953    | 1.2  | 13.5367 | 0.6 | 1.7453 | 1.2 | 0.1714 | 1.1 | 0.88 | 1020 | 10 | 1025 | 8  | 1037 | 11 | 1037 | 11 | 98  |
| EC17-1B | 173 | 100 | 98895    | 1.1  | 13.3614 | 0.9 | 1.7958 | 1.5 | 0.1741 | 1.2 | 0.78 | 1035 | 11 | 1044 | 10 | 1063 | 19 | 1063 | 19 | 97  |
| EC17-1B | 174 | 75  | 28665    | 3.1  | 13.5380 | 0.9 | 1.7716 | 1.3 | 0.1740 | 1.0 | 0.74 | 1034 | 9  | 1035 | 9  | 1037 | 18 | 1037 | 18 | 100 |
| EC17-1B | 175 | 501 | 257774   | 3.4  | 12.6752 | 0.5 | 2.0515 | 0.9 | 0.1887 | 0.8 | 0.83 | 1114 | 8  | 1133 | 6  | 1169 | 11 | 1169 | 11 | 95  |
| EC17-1B | 176 | 80  | 32561    | 2.7  | 12.6336 | 0.9 | 2.1087 | 1.4 | 0.1933 | 1.1 | 0.79 | 1139 | 12 | 1152 | 10 | 1175 | 17 | 1175 | 17 | 97  |
| EC17-1B | 177 | 232 | 104100   | 1.3  | 16.2782 | 0.7 | 0.8032 | 1.2 | 0.0949 | 1.0 | 0.83 | 584  | 6  | 599  | 6  | 653  | 15 | 584  | 6  | 89  |
| EC17-1B | 178 | 293 | 145936   | 3.9  | 14.2994 | 0.6 | 1.5347 | 1.0 | 0.1592 | 0.8 | 0.80 | 952  | 7  | 944  | 6  | 926  | 12 | 926  | 12 | 103 |
| EC17-1B | 179 | 251 | 241052   | 1.4  | 12.1830 | 0.5 | 2.3132 | 1.2 | 0.2045 | 1.0 | 0.90 | 1199 | 11 | 1216 | 8  | 1247 | 10 | 1247 | 10 | 96  |
| EC17-1B | 180 | 719 | 767002   | 5.0  | 13.4863 | 0.7 | 1.8062 | 1.1 | 0.1767 | 0.9 | 0.80 | 1049 | 9  | 1048 | 7  | 1045 | 14 | 1045 | 14 | 100 |
| EC17-1B | 181 | 299 | 554900   | 2.5  | 11.0944 | 0.6 | 3.1313 | 1.2 | 0.2521 | 1.0 | 0.85 | 1449 | 13 | 1440 | 9  | 1428 | 12 | 1428 | 12 | 102 |
| EC17-1B | 182 | 135 | 3056927  | 2.7  | 12.7178 | 0.8 | 2.1275 | 1.6 | 0.1963 | 1.3 | 0.84 | 1156 | 14 | 1158 | 11 | 1162 | 17 | 1162 | 17 | 99  |
| EC17-1B | 184 | 937 | 24732    | 17.4 | 12.3830 | 0.8 | 2.0268 | 1.3 | 0.1821 | 1.1 | 0.82 | 1078 | 11 | 1125 | 9  | 1215 | 15 | 1215 | 15 | 89  |
| EC17-1B | 185 | 951 | 1976227  | 5.2  | 13.2761 | 0.8 | 1.8792 | 1.2 | 0.1810 | 0.9 | 0.76 | 1073 | 9  | 1074 | 8  | 1076 | 15 | 1076 | 15 | 100 |
| EC17-1B | 186 | 166 | 401460   | 2.8  | 13.2947 | 0.8 | 1.7661 | 1.4 | 0.1704 | 1.1 | 0.79 | 1014 | 10 | 1033 | 9  | 1073 | 17 | 1073 | 17 | 94  |
| EC17-1B | 187 | 281 | 115519   | 3.2  | 13.0353 | 0.6 | 1.9402 | 1.1 | 0.1835 | 0.9 | 0.86 | 1086 | 9  | 1095 | 7  | 1113 | 11 | 1113 | 11 | 98  |
| EC17-1B | 188 | 172 | 593491   | 1.7  | 12.2872 | 0.6 | 2.3177 | 1.1 | 0.2066 | 1.0 | 0.86 | 1211 | 11 | 1218 | 8  | 1230 | 11 | 1230 | 11 | 98  |
| EC17-1B | 189 | 257 | 186596   | 2.0  | 12.5664 | 0.7 | 2.1060 | 1.2 | 0.1920 | 1.0 | 0.84 | 1132 | 11 | 1151 | 9  | 1186 | 13 | 1186 | 13 | 95  |
| EC17-1B | 190 | 110 | 62715    | 1.6  | 14.3356 | 0.8 | 1.4175 | 1.1 | 0.1474 | 0.7 | 0.67 | 887  | 6  | 896  | 6  | 920  | 16 | 920  | 16 | 96  |
| EC17-1B | 191 | 57  | 25713    | 3.5  | 13.0392 | 0.9 | 1.8027 | 1.3 | 0.1706 | 1.0 | 0.76 | 1015 | 10 | 1046 | 9  | 1112 | 17 | 1112 | 17 | 91  |
| EC17-1B | 192 | 117 | 116749   | 3.3  | 12.9372 | 0.7 | 1.9750 | 1.2 | 0.1854 | 0.9 | 0.77 | 1096 | 9  | 1107 | 8  | 1128 | 15 | 1128 | 15 | 97  |
| EC17-1B | 193 | 66  | 48661    | 2.5  | 13.2343 | 0.7 | 1.7695 | 1.4 | 0.1699 | 1.1 | 0.84 | 1012 | 11 | 1034 | 9  | 1083 | 15 | 1083 | 15 | 93  |

|         |     |     |         |     |         |     |        |     |        |     |      |      |    |      |    |      |    |      |    |     |
|---------|-----|-----|---------|-----|---------|-----|--------|-----|--------|-----|------|------|----|------|----|------|----|------|----|-----|
| EC17-1B | 194 | 100 | 225498  | 1.4 | 11.2883 | 0.7 | 2.8303 | 1.2 | 0.2318 | 0.9 | 0.81 | 1344 | 11 | 1364 | 9  | 1394 | 13 | 1394 | 13 | 96  |
| EC17-1B | 195 | 66  | 168210  | 1.0 | 13.8460 | 0.9 | 1.4800 | 1.3 | 0.1487 | 1.0 | 0.73 | 894  | 8  | 922  | 8  | 991  | 19 | 991  | 19 | 90  |
| EC17-1B | 196 | 501 | 43973   | 4.2 | 12.6663 | 0.7 | 1.8945 | 2.0 | 0.1741 | 1.9 | 0.94 | 1035 | 18 | 1079 | 14 | 1170 | 14 | 1170 | 14 | 88  |
| EC17-1B | 197 | 182 | 59721   | 5.4 | 13.6323 | 0.7 | 1.6973 | 1.3 | 0.1679 | 1.1 | 0.84 | 1000 | 10 | 1008 | 8  | 1023 | 14 | 1023 | 14 | 98  |
| EC17-1B | 198 | 134 | 32518   | 2.1 | 13.3385 | 0.8 | 1.8953 | 1.3 | 0.1834 | 1.1 | 0.82 | 1086 | 11 | 1079 | 9  | 1067 | 15 | 1067 | 15 | 102 |
| EC17-1B | 199 | 186 | 38012   | 2.1 | 14.2333 | 0.7 | 1.4896 | 1.5 | 0.1538 | 1.3 | 0.87 | 922  | 11 | 926  | 9  | 935  | 15 | 935  | 15 | 99  |
| EC17-1B | 200 | 424 | 182878  | 4.4 | 13.0559 | 0.7 | 1.9444 | 1.2 | 0.1842 | 1.0 | 0.82 | 1090 | 10 | 1097 | 8  | 1110 | 14 | 1110 | 14 | 98  |
| EC17-1B | 201 | 447 | 291379  | 3.6 | 13.0417 | 0.7 | 1.9224 | 1.3 | 0.1819 | 1.1 | 0.86 | 1077 | 11 | 1089 | 9  | 1112 | 13 | 1112 | 13 | 97  |
| EC17-1B | 202 | 134 | 42425   | 2.4 | 13.2015 | 0.8 | 1.7973 | 1.2 | 0.1722 | 0.9 | 0.73 | 1024 | 8  | 1044 | 8  | 1088 | 17 | 1088 | 17 | 94  |
| EC17-1B | 203 | 171 | 165978  | 3.0 | 11.5125 | 1.0 | 2.7598 | 1.8 | 0.2305 | 1.5 | 0.83 | 1337 | 18 | 1345 | 13 | 1357 | 19 | 1357 | 19 | 99  |
| EC17-1B | 204 | 455 | 260228  | 2.3 | 13.6155 | 0.8 | 1.7135 | 1.3 | 0.1693 | 1.0 | 0.80 | 1008 | 9  | 1014 | 8  | 1025 | 15 | 1025 | 15 | 98  |
| EC17-1B | 205 | 147 | 92420   | 1.6 | 12.6973 | 0.8 | 2.1237 | 1.3 | 0.1957 | 1.1 | 0.81 | 1152 | 12 | 1157 | 9  | 1165 | 16 | 1165 | 16 | 99  |
| EC17-1B | 206 | 71  | 27827   | 2.3 | 13.2973 | 0.8 | 1.8624 | 1.2 | 0.1797 | 0.8 | 0.70 | 1065 | 8  | 1068 | 8  | 1073 | 17 | 1073 | 17 | 99  |
| EC17-1B | 207 | 821 | 398984  | 6.0 | 13.5461 | 0.6 | 1.7986 | 1.2 | 0.1768 | 1.0 | 0.86 | 1049 | 10 | 1045 | 8  | 1036 | 12 | 1036 | 12 | 101 |
| EC17-1B | 208 | 155 | 150764  | 3.0 | 13.4501 | 0.8 | 1.7507 | 1.4 | 0.1708 | 1.2 | 0.84 | 1017 | 11 | 1027 | 9  | 1050 | 15 | 1050 | 15 | 97  |
| EC17-1B | 209 | 189 | 59758   | 3.0 | 14.1432 | 0.8 | 1.4586 | 1.4 | 0.1497 | 1.1 | 0.81 | 899  | 10 | 913  | 8  | 948  | 17 | 948  | 17 | 95  |
| EC17-1B | 210 | 92  | 42050   | 2.7 | 12.5138 | 0.9 | 2.2099 | 1.6 | 0.2007 | 1.3 | 0.82 | 1179 | 14 | 1184 | 11 | 1194 | 18 | 1194 | 18 | 99  |
| EC17-1B | 211 | 218 | 98608   | 1.0 | 13.4927 | 0.6 | 1.7460 | 1.2 | 0.1709 | 1.0 | 0.86 | 1017 | 10 | 1026 | 8  | 1044 | 12 | 1044 | 12 | 97  |
| EC17-1B | 212 | 205 | 266621  | 1.8 | 12.0458 | 0.8 | 2.3240 | 1.4 | 0.2031 | 1.2 | 0.85 | 1192 | 13 | 1220 | 10 | 1269 | 15 | 1269 | 15 | 94  |
| EC17-1B | 213 | 215 | 2140808 | 6.0 | 12.7684 | 0.8 | 2.0760 | 1.4 | 0.1923 | 1.1 | 0.82 | 1134 | 12 | 1141 | 9  | 1154 | 15 | 1154 | 15 | 98  |
| EC17-1B | 214 | 477 | 451277  | 3.4 | 13.4555 | 0.6 | 1.8156 | 1.2 | 0.1773 | 1.0 | 0.88 | 1052 | 10 | 1051 | 8  | 1049 | 12 | 1049 | 12 | 100 |
| EC17-1B | 215 | 285 | 62642   | 2.0 | 13.4044 | 0.7 | 1.7828 | 1.2 | 0.1734 | 1.0 | 0.80 | 1031 | 9  | 1039 | 8  | 1057 | 15 | 1057 | 15 | 98  |
| EC17-1B | 216 | 166 | 95196   | 1.4 | 13.2589 | 0.8 | 1.8728 | 1.7 | 0.1802 | 1.5 | 0.86 | 1068 | 14 | 1072 | 11 | 1079 | 17 | 1079 | 17 | 99  |
| EC17-1B | 217 | 296 | 56274   | 2.0 | 17.6325 | 0.9 | 0.5766 | 1.3 | 0.0738 | 1.0 | 0.76 | 459  | 5  | 462  | 5  | 479  | 19 | 459  | 5  | 96  |
| EC17-1B | 218 | 110 | 193227  | 2.4 | 12.3001 | 0.8 | 2.3142 | 1.4 | 0.2065 | 1.1 | 0.81 | 1210 | 12 | 1217 | 10 | 1228 | 16 | 1228 | 16 | 99  |
| EC17-1B | 219 | 96  | 63638   | 2.1 | 12.3078 | 0.6 | 2.3547 | 1.4 | 0.2103 | 1.3 | 0.92 | 1230 | 14 | 1229 | 10 | 1227 | 11 | 1227 | 11 | 100 |
| EC17-1B | 220 | 39  | 76057   | 1.7 | 12.8774 | 0.9 | 2.0672 | 1.4 | 0.1932 | 1.1 | 0.80 | 1138 | 12 | 1138 | 10 | 1137 | 17 | 1137 | 17 | 100 |
| EC17-1B | 221 | 83  | 45455   | 1.9 | 13.7673 | 0.7 | 1.6438 | 1.2 | 0.1642 | 1.0 | 0.81 | 980  | 9  | 987  | 8  | 1003 | 15 | 1003 | 15 | 98  |
| EC17-1B | 222 | 156 | 86701   | 3.6 | 13.7539 | 0.8 | 1.6854 | 1.3 | 0.1682 | 1.1 | 0.81 | 1002 | 10 | 1003 | 8  | 1005 | 15 | 1005 | 15 | 100 |
| EC17-1B | 223 | 351 | 3633723 | 2.1 | 10.9568 | 0.5 | 3.2093 | 1.1 | 0.2551 | 1.0 | 0.88 | 1465 | 13 | 1459 | 9  | 1451 | 10 | 1451 | 10 | 101 |
| EC17-1B | 224 | 146 | 31678   | 2.6 | 13.0979 | 0.8 | 1.9050 | 1.1 | 0.1810 | 0.8 | 0.71 | 1073 | 7  | 1083 | 7  | 1103 | 15 | 1103 | 15 | 97  |
| EC17-1B | 225 | 81  | 87758   | 1.9 | 13.1260 | 0.7 | 1.9095 | 1.3 | 0.1819 | 1.2 | 0.87 | 1077 | 11 | 1084 | 9  | 1099 | 13 | 1099 | 13 | 98  |
| EC17-1B | 226 | 91  | 28098   | 3.0 | 12.4999 | 1.3 | 1.8237 | 1.6 | 0.1654 | 1.1 | 0.64 | 987  | 10 | 1054 | 11 | 1196 | 25 | 1196 | 25 | 82  |
| EC17-1B | 227 | 112 | 293784  | 2.1 | 15.1971 | 0.9 | 1.1119 | 1.4 | 0.1226 | 1.1 | 0.78 | 746  | 8  | 759  | 8  | 799  | 19 | 746  | 8  | 93  |
| EC17-1B | 228 | 324 | 107477  | 2.6 | 11.6636 | 0.6 | 2.6284 | 1.4 | 0.2224 | 1.2 | 0.89 | 1295 | 14 | 1309 | 10 | 1331 | 12 | 1331 | 12 | 97  |
| EC17-1B | 229 | 466 | 339628  | 6.0 | 13.6275 | 0.5 | 1.7045 | 1.1 | 0.1685 | 0.9 | 0.88 | 1004 | 9  | 1010 | 7  | 1024 | 10 | 1024 | 10 | 98  |
| EC17-1B | 230 | 252 | 188302  | 6.1 | 13.1525 | 0.6 | 1.9583 | 1.2 | 0.1869 | 1.0 | 0.84 | 1105 | 10 | 1101 | 8  | 1095 | 13 | 1095 | 13 | 101 |
| EC17-1B | 231 | 165 | 194394  | 3.6 | 10.9918 | 0.7 | 3.0009 | 1.1 | 0.2393 | 0.8 | 0.78 | 1383 | 10 | 1408 | 8  | 1445 | 12 | 1445 | 12 | 96  |
| EC17-1B | 232 | 576 | 683660  | 3.0 | 11.0252 | 0.8 | 3.0481 | 1.3 | 0.2438 | 1.1 | 0.81 | 1407 | 13 | 1420 | 10 | 1439 | 15 | 1439 | 15 | 98  |
| EC17-1B | 233 | 46  | 51468   | 0.8 | 13.5596 | 0.9 | 1.7370 | 1.3 | 0.1709 | 1.0 | 0.75 | 1017 | 10 | 1022 | 9  | 1034 | 18 | 1034 | 18 | 98  |
| EC17-1B | 234 | 195 | 79483   | 1.7 | 12.3579 | 0.6 | 2.3019 | 1.3 | 0.2064 | 1.2 | 0.89 | 1210 | 13 | 1213 | 9  | 1219 | 12 | 1219 | 12 | 99  |
| EC17-1B | 235 | 250 | 248483  | 2.8 | 10.9740 | 0.7 | 2.9732 | 1.4 | 0.2367 | 1.2 | 0.87 | 1370 | 15 | 1401 | 11 | 1448 | 13 | 1448 | 13 | 95  |
| EC17-1B | 236 | 736 | 117091  | 2.9 | 12.5211 | 0.8 | 2.0675 | 1.4 | 0.1878 | 1.2 | 0.83 | 1110 | 12 | 1138 | 10 | 1193 | 16 | 1193 | 16 | 93  |
| EC17-1B | 237 | 525 | 2239849 | 1.5 | 9.9269  | 0.7 | 4.0325 | 1.1 | 0.2905 | 0.9 | 0.80 | 1644 | 13 | 1641 | 9  | 1637 | 12 | 1637 | 12 | 100 |
| EC17-1B | 238 | 101 | 140129  | 2.3 | 12.9656 | 0.6 | 1.9393 | 1.1 | 0.1824 | 0.9 | 0.80 | 1080 | 9  | 1095 | 7  | 1124 | 13 | 1124 | 13 | 96  |
| EC17-1B | 239 | 430 | 4643983 | 9.1 | 12.4802 | 0.6 | 2.1898 | 1.2 | 0.1983 | 1.0 | 0.87 | 1166 | 11 | 1178 | 8  | 1199 | 12 | 1199 | 12 | 97  |

|         |     |      |         |      |         |     |        |     |        |     |      |      |    |      |    |      |    |      |    |     |
|---------|-----|------|---------|------|---------|-----|--------|-----|--------|-----|------|------|----|------|----|------|----|------|----|-----|
| EC17-1B | 240 | 240  | 282999  | 3.3  | 13.6336 | 0.8 | 1.7202 | 1.5 | 0.1702 | 1.2 | 0.83 | 1013 | 11 | 1016 | 9  | 1023 | 16 | 1023 | 16 | 99  |
| EC17-1B | 241 | 474  | 843502  | 4.3  | 13.5250 | 0.7 | 1.8581 | 1.2 | 0.1823 | 1.0 | 0.81 | 1080 | 10 | 1066 | 8  | 1039 | 14 | 1039 | 14 | 104 |
| EC17-1B | 242 | 146  | 110579  | 4.7  | 13.6476 | 0.8 | 1.6767 | 1.4 | 0.1660 | 1.2 | 0.83 | 990  | 11 | 1000 | 9  | 1021 | 16 | 1021 | 16 | 97  |
| EC17-1B | 243 | 59   | 43012   | 2.7  | 13.4219 | 1.0 | 1.8181 | 1.3 | 0.1771 | 0.9 | 0.66 | 1051 | 8  | 1052 | 9  | 1054 | 20 | 1054 | 20 | 100 |
| EC17-1B | 244 | 1060 | 55784   | 4.0  | 12.4048 | 0.5 | 2.1307 | 1.2 | 0.1918 | 1.1 | 0.91 | 1131 | 11 | 1159 | 8  | 1211 | 10 | 1211 | 10 | 93  |
| EC17-1B | 246 | 246  | 257142  | 3.3  | 13.3789 | 0.7 | 1.9170 | 1.2 | 0.1861 | 0.9 | 0.81 | 1100 | 9  | 1087 | 8  | 1061 | 14 | 1061 | 14 | 104 |
| EC17-1B | 247 | 675  | 487238  | 3.0  | 12.5959 | 0.7 | 2.1673 | 1.1 | 0.1981 | 0.9 | 0.79 | 1165 | 9  | 1171 | 8  | 1181 | 13 | 1181 | 13 | 99  |
| EC17-1B | 248 | 236  | 25626   | 1.6  | 12.7777 | 1.3 | 1.8850 | 1.7 | 0.1748 | 1.0 | 0.62 | 1038 | 10 | 1076 | 11 | 1153 | 26 | 1153 | 26 | 90  |
| EC17-1B | 250 | 224  | 81667   | 3.9  | 13.5689 | 0.6 | 1.7435 | 1.1 | 0.1717 | 1.0 | 0.86 | 1021 | 9  | 1025 | 7  | 1032 | 12 | 1032 | 12 | 99  |
| EC17-1B | 251 | 93   | 30614   | 2.6  | 13.8117 | 0.9 | 1.7393 | 1.4 | 0.1743 | 1.1 | 0.78 | 1036 | 10 | 1023 | 9  | 996  | 17 | 996  | 17 | 104 |
| EC17-1B | 252 | 268  | 210570  | 4.3  | 13.6850 | 0.7 | 1.7357 | 1.3 | 0.1723 | 1.1 | 0.86 | 1025 | 11 | 1022 | 8  | 1015 | 13 | 1015 | 13 | 101 |
| EC17-1B | 253 | 123  | 134633  | 2.0  | 13.6644 | 0.8 | 1.7182 | 1.4 | 0.1704 | 1.1 | 0.80 | 1014 | 11 | 1015 | 9  | 1018 | 17 | 1018 | 17 | 100 |
| EC17-1B | 254 | 422  | 272684  | 2.4  | 13.7278 | 0.6 | 1.6740 | 1.3 | 0.1667 | 1.2 | 0.89 | 994  | 11 | 999  | 9  | 1009 | 12 | 1009 | 12 | 99  |
| EC17-1B | 255 | 397  | 200009  | 2.3  | 12.7153 | 0.6 | 2.1067 | 1.3 | 0.1944 | 1.2 | 0.88 | 1145 | 12 | 1151 | 9  | 1162 | 13 | 1162 | 13 | 99  |
| EC17-1B | 256 | 201  | 66209   | 1.1  | 12.9907 | 0.7 | 1.8165 | 1.3 | 0.1712 | 1.1 | 0.83 | 1019 | 10 | 1051 | 9  | 1120 | 14 | 1120 | 14 | 91  |
| EC17-1B | 257 | 566  | 166795  | 1.7  | 12.8640 | 0.7 | 2.0347 | 1.0 | 0.1899 | 0.8 | 0.76 | 1121 | 8  | 1127 | 7  | 1139 | 13 | 1139 | 13 | 98  |
| EC17-1B | 258 | 172  | 226032  | 5.4  | 13.3765 | 0.7 | 1.8253 | 1.2 | 0.1772 | 1.0 | 0.83 | 1051 | 10 | 1055 | 8  | 1061 | 14 | 1061 | 14 | 99  |
| EC17-1B | 259 | 1263 | 437723  | 2.7  | 12.7784 | 0.6 | 2.1286 | 1.1 | 0.1974 | 0.9 | 0.83 | 1161 | 10 | 1158 | 7  | 1153 | 12 | 1153 | 12 | 101 |
| EC17-1B | 260 | 404  | 156570  | 4.1  | 10.8113 | 0.5 | 3.2321 | 1.0 | 0.2535 | 0.9 | 0.86 | 1457 | 11 | 1465 | 8  | 1477 | 10 | 1477 | 10 | 99  |
| EC17-1B | 261 | 121  | 191435  | 1.9  | 13.9192 | 0.9 | 1.5444 | 1.2 | 0.1560 | 0.8 | 0.68 | 934  | 7  | 948  | 7  | 981  | 18 | 981  | 18 | 95  |
| EC17-1B | 262 | 320  | 231823  | 3.9  | 12.9811 | 0.7 | 2.0012 | 1.3 | 0.1885 | 1.1 | 0.86 | 1113 | 12 | 1116 | 9  | 1121 | 13 | 1121 | 13 | 99  |
| EC17-1B | 263 | 159  | 155715  | 2.6  | 10.8377 | 0.6 | 3.2192 | 1.1 | 0.2531 | 0.9 | 0.82 | 1455 | 12 | 1462 | 9  | 1472 | 12 | 1472 | 12 | 99  |
| EC17-1B | 264 | 786  | 553447  | 4.9  | 13.5748 | 0.5 | 1.7363 | 1.0 | 0.1710 | 0.8 | 0.85 | 1018 | 8  | 1022 | 6  | 1031 | 11 | 1031 | 11 | 99  |
| EC17-1B | 265 | 330  | 132026  | 3.1  | 13.5973 | 0.7 | 1.7223 | 1.0 | 0.1699 | 0.7 | 0.70 | 1012 | 6  | 1017 | 6  | 1028 | 14 | 1028 | 14 | 98  |
| EC17-1B | 266 | 605  | 1431623 | 1.7  | 11.8512 | 0.6 | 2.6717 | 1.2 | 0.2297 | 1.0 | 0.87 | 1333 | 12 | 1321 | 9  | 1300 | 11 | 1300 | 11 | 103 |
| EC17-1B | 267 | 349  | 272577  | 2.1  | 12.1980 | 0.7 | 2.4158 | 1.2 | 0.2138 | 1.0 | 0.81 | 1249 | 11 | 1247 | 9  | 1244 | 14 | 1244 | 14 | 100 |
| EC17-1B | 268 | 206  | 108447  | 4.1  | 13.3768 | 0.9 | 1.7541 | 1.3 | 0.1703 | 0.9 | 0.72 | 1014 | 9  | 1029 | 8  | 1061 | 17 | 1061 | 17 | 96  |
| EC17-1B | 269 | 142  | 106051  | 1.5  | 11.5272 | 0.7 | 2.6083 | 1.1 | 0.2182 | 0.9 | 0.79 | 1272 | 10 | 1303 | 8  | 1354 | 13 | 1354 | 13 | 94  |
| EC17-1B | 270 | 275  | 108093  | 3.2  | 13.3804 | 0.6 | 1.8240 | 1.1 | 0.1771 | 0.9 | 0.82 | 1051 | 9  | 1054 | 7  | 1061 | 13 | 1061 | 13 | 99  |
| EC17-1B | 271 | 118  | 327228  | 2.6  | 13.1076 | 0.9 | 1.9011 | 1.5 | 0.1808 | 1.2 | 0.79 | 1071 | 12 | 1081 | 10 | 1102 | 18 | 1102 | 18 | 97  |
| EC17-1B | 272 | 677  | 408121  | 3.3  | 13.4320 | 0.6 | 1.8416 | 1.2 | 0.1795 | 1.0 | 0.86 | 1064 | 10 | 1060 | 8  | 1053 | 12 | 1053 | 12 | 101 |
| EC17-1B | 273 | 83   | 371051  | 2.2  | 11.0308 | 0.7 | 3.1088 | 1.4 | 0.2488 | 1.2 | 0.86 | 1432 | 15 | 1435 | 10 | 1439 | 13 | 1439 | 13 | 100 |
| EC17-1B | 274 | 141  | 128231  | 2.6  | 12.4709 | 0.7 | 2.1712 | 1.2 | 0.1965 | 0.9 | 0.78 | 1156 | 10 | 1172 | 8  | 1201 | 15 | 1201 | 15 | 96  |
| EC17-1B | 275 | 269  | 105891  | 2.2  | 12.0710 | 0.5 | 2.3935 | 1.1 | 0.2096 | 1.0 | 0.88 | 1227 | 11 | 1241 | 8  | 1265 | 10 | 1265 | 10 | 97  |
| EC17-1B | 276 | 604  | 160383  | 3.3  | 12.1006 | 0.7 | 2.4189 | 1.6 | 0.2124 | 1.4 | 0.90 | 1242 | 16 | 1248 | 11 | 1260 | 13 | 1260 | 13 | 99  |
| EC17-1B | 277 | 120  | 48271   | 2.0  | 13.2677 | 0.8 | 1.7398 | 1.1 | 0.1675 | 0.9 | 0.75 | 998  | 8  | 1023 | 7  | 1078 | 15 | 1078 | 15 | 93  |
| EC17-1B | 278 | 208  | 1943152 | 2.1  | 12.5423 | 0.7 | 2.1186 | 1.1 | 0.1928 | 0.8 | 0.77 | 1137 | 9  | 1155 | 8  | 1189 | 14 | 1189 | 14 | 96  |
| EC17-1B | 279 | 99   | 418376  | 2.1  | 13.6303 | 0.7 | 1.8047 | 1.2 | 0.1785 | 1.0 | 0.82 | 1059 | 10 | 1047 | 8  | 1023 | 15 | 1023 | 15 | 103 |
| EC17-1B | 280 | 266  | 93882   | 2.0  | 11.7630 | 0.9 | 2.5694 | 1.4 | 0.2193 | 1.1 | 0.80 | 1278 | 13 | 1292 | 10 | 1315 | 17 | 1315 | 17 | 97  |
| EC17-1B | 281 | 100  | 98969   | 1.2  | 12.6273 | 0.8 | 2.1260 | 1.1 | 0.1948 | 0.8 | 0.74 | 1147 | 9  | 1157 | 8  | 1176 | 15 | 1176 | 15 | 98  |
| EC17-1B | 282 | 162  | 74255   | 0.9  | 16.5581 | 0.7 | 0.7837 | 1.1 | 0.0942 | 0.8 | 0.76 | 580  | 5  | 588  | 5  | 617  | 16 | 580  | 5  | 94  |
| EC17-1B | 283 | 762  | 178808  | 3.3  | 12.1137 | 0.5 | 2.4639 | 1.0 | 0.2166 | 0.8 | 0.84 | 1264 | 10 | 1262 | 7  | 1258 | 11 | 1258 | 11 | 100 |
| EC17-1B | 284 | 56   | 16273   | 1.8  | 12.9970 | 0.9 | 1.9209 | 1.3 | 0.1812 | 0.9 | 0.70 | 1073 | 9  | 1088 | 8  | 1119 | 18 | 1119 | 18 | 96  |
| EC17-1B | 285 | 1945 | 76624   | 44.5 | 13.4290 | 0.8 | 1.5213 | 1.3 | 0.1482 | 1.1 | 0.79 | 891  | 9  | 939  | 8  | 1053 | 17 | 1053 | 17 | 85  |
| EC17-1B | 286 | 140  | 47620   | 1.8  | 10.8579 | 0.5 | 3.2143 | 0.9 | 0.2532 | 0.8 | 0.83 | 1455 | 10 | 1461 | 7  | 1469 | 10 | 1469 | 10 | 99  |
| EC17-1B | 287 | 311  | 168627  | 3.1  | 12.6935 | 0.7 | 2.1439 | 1.2 | 0.1975 | 1.0 | 0.83 | 1162 | 11 | 1163 | 9  | 1166 | 14 | 1166 | 14 | 100 |

|         |     |     |         |     |         |     |        |     |        |     |      |      |    |      |    |      |    |      |    |     |
|---------|-----|-----|---------|-----|---------|-----|--------|-----|--------|-----|------|------|----|------|----|------|----|------|----|-----|
| EC17-1B | 288 | 133 | 43830   | 3.4 | 13.8442 | 0.7 | 1.6213 | 1.4 | 0.1629 | 1.2 | 0.85 | 973  | 11 | 978  | 9  | 992  | 15 | 992  | 15 | 98  |
| EC17-1B | 289 | 333 | 76486   | 2.6 | 17.9512 | 0.8 | 0.4970 | 1.3 | 0.0647 | 1.0 | 0.78 | 404  | 4  | 410  | 4  | 440  | 18 | 404  | 4  | 92  |
| EC17-1B | 290 | 696 | 248349  | 1.9 | 12.4990 | 0.5 | 2.1638 | 1.2 | 0.1962 | 1.1 | 0.91 | 1155 | 11 | 1170 | 8  | 1196 | 10 | 1196 | 10 | 97  |
| EC17-1B | 291 | 223 | 112238  | 3.4 | 12.6527 | 0.6 | 2.1365 | 1.1 | 0.1961 | 1.0 | 0.86 | 1155 | 10 | 1161 | 8  | 1172 | 12 | 1172 | 12 | 98  |
| EC17-1B | 292 | 527 | 185952  | 3.1 | 12.8991 | 0.6 | 2.0688 | 1.1 | 0.1936 | 0.9 | 0.83 | 1141 | 10 | 1139 | 8  | 1134 | 12 | 1134 | 12 | 101 |
| EC17-1B | 293 | 82  | 109782  | 2.0 | 13.3619 | 0.8 | 1.8484 | 1.4 | 0.1792 | 1.1 | 0.78 | 1063 | 10 | 1063 | 9  | 1063 | 17 | 1063 | 17 | 100 |
| EC17-1B | 294 | 553 | 170672  | 2.4 | 12.6699 | 0.6 | 2.1705 | 1.2 | 0.1995 | 1.0 | 0.88 | 1173 | 11 | 1172 | 8  | 1169 | 11 | 1169 | 11 | 100 |
| EC17-1B | 295 | 250 | 424571  | 5.2 | 13.5210 | 0.6 | 1.7821 | 1.1 | 0.1748 | 0.9 | 0.85 | 1039 | 9  | 1039 | 7  | 1039 | 12 | 1039 | 12 | 100 |
| EC17-1B | 296 | 121 | 126933  | 3.0 | 12.7914 | 0.8 | 2.1449 | 1.2 | 0.1991 | 0.9 | 0.77 | 1170 | 10 | 1163 | 9  | 1151 | 16 | 1151 | 16 | 102 |
| EC17-1B | 297 | 48  | 85714   | 2.5 | 13.1316 | 1.0 | 1.8576 | 1.4 | 0.1770 | 0.9 | 0.70 | 1051 | 9  | 1066 | 9  | 1098 | 19 | 1098 | 19 | 96  |
| EC17-1B | 298 | 100 | 34886   | 3.6 | 12.7785 | 0.7 | 2.1345 | 1.2 | 0.1979 | 1.0 | 0.82 | 1164 | 10 | 1160 | 8  | 1153 | 13 | 1153 | 13 | 101 |
| EC17-1B | 299 | 114 | 152034  | 2.7 | 13.5642 | 0.7 | 1.7084 | 1.0 | 0.1681 | 0.8 | 0.75 | 1002 | 7  | 1012 | 7  | 1033 | 14 | 1033 | 14 | 97  |
| EC17-1B | 300 | 136 | 330240  | 3.0 | 12.0301 | 0.7 | 2.4261 | 1.0 | 0.2118 | 0.7 | 0.69 | 1238 | 8  | 1250 | 7  | 1271 | 14 | 1271 | 14 | 97  |
| EC17-1B | 301 | 401 | 99855   | 2.8 | 11.5385 | 0.8 | 2.6044 | 1.2 | 0.2180 | 1.0 | 0.77 | 1272 | 11 | 1302 | 9  | 1352 | 15 | 1352 | 15 | 94  |
| EC17-1B | 302 | 196 | 88362   | 3.7 | 12.2159 | 0.7 | 2.3612 | 1.1 | 0.2093 | 0.9 | 0.81 | 1225 | 10 | 1231 | 8  | 1241 | 13 | 1241 | 13 | 99  |
| EC17-1B | 303 | 243 | 180760  | 2.2 | 13.5674 | 0.6 | 1.7678 | 1.3 | 0.1740 | 1.2 | 0.88 | 1034 | 11 | 1034 | 9  | 1033 | 13 | 1033 | 13 | 100 |
| EC17-1B | 304 | 50  | 114252  | 1.1 | 11.7476 | 0.8 | 2.7497 | 1.3 | 0.2344 | 1.0 | 0.81 | 1357 | 13 | 1342 | 10 | 1318 | 15 | 1318 | 15 | 103 |
| EC17-1B | 305 | 187 | 895566  | 2.3 | 12.5408 | 0.6 | 2.1890 | 2.2 | 0.1992 | 2.1 | 0.96 | 1171 | 22 | 1178 | 15 | 1190 | 12 | 1190 | 12 | 98  |
| EC17-1B | 306 | 299 | 1564833 | 2.4 | 12.7666 | 0.6 | 2.0740 | 1.4 | 0.1921 | 1.2 | 0.88 | 1133 | 13 | 1140 | 9  | 1154 | 13 | 1154 | 13 | 98  |
| EC17-1B | 307 | 260 | 79811   | 3.5 | 17.8882 | 0.7 | 0.5291 | 1.3 | 0.0687 | 1.0 | 0.82 | 428  | 4  | 431  | 4  | 448  | 16 | 428  | 4  | 96  |
| EC17-1B | 308 | 183 | 57395   | 2.7 | 13.6773 | 0.8 | 1.7191 | 1.4 | 0.1706 | 1.1 | 0.82 | 1015 | 11 | 1016 | 9  | 1016 | 16 | 1016 | 16 | 100 |
| EC17-1B | 309 | 343 | 210937  | 2.8 | 14.1602 | 0.6 | 1.4737 | 1.0 | 0.1514 | 0.9 | 0.81 | 909  | 7  | 920  | 6  | 946  | 12 | 946  | 12 | 96  |
| EC17-1B | 310 | 433 | 567294  | 6.9 | 12.6523 | 0.6 | 2.1899 | 1.3 | 0.2010 | 1.2 | 0.88 | 1181 | 13 | 1178 | 9  | 1172 | 12 | 1172 | 12 | 101 |
| EC17-1B | 311 | 168 | 169133  | 2.0 | 13.9860 | 0.6 | 1.5341 | 1.2 | 0.1557 | 1.0 | 0.84 | 933  | 9  | 944  | 7  | 971  | 13 | 971  | 13 | 96  |
| EC17-1B | 312 | 163 | 105167  | 3.1 | 13.5747 | 0.6 | 1.7860 | 1.2 | 0.1759 | 1.0 | 0.83 | 1045 | 9  | 1040 | 8  | 1031 | 13 | 1031 | 13 | 101 |
| EC17-1B | 314 | 293 | 47713   | 3.6 | 13.5502 | 0.7 | 1.7175 | 1.4 | 0.1689 | 1.2 | 0.87 | 1006 | 11 | 1015 | 9  | 1035 | 14 | 1035 | 14 | 97  |
| EC17-1B | 315 | 89  | 1372327 | 1.8 | 12.4540 | 0.9 | 2.2272 | 1.4 | 0.2013 | 1.1 | 0.76 | 1182 | 11 | 1190 | 10 | 1203 | 18 | 1203 | 18 | 98  |

|        |    |     |        |     |         |     |        |     |        |     |      |      |    |      |    |      |    |      |    |     |
|--------|----|-----|--------|-----|---------|-----|--------|-----|--------|-----|------|------|----|------|----|------|----|------|----|-----|
| EC17-2 | 1  | 40  | 131407 | 1.2 | 13.6895 | 1.0 | 1.6726 | 1.4 | 0.1661 | 1.1 | 0.74 | 991  | 10 | 998  | 9  | 1014 | 19 | 1014 | 19 | 98  |
| EC17-2 | 2  | 150 | 144464 | 4.0 | 13.3447 | 0.6 | 1.8695 | 1.3 | 0.1810 | 1.1 | 0.88 | 1073 | 11 | 1070 | 9  | 1066 | 13 | 1066 | 13 | 101 |
| EC17-2 | 3  | 428 | 104896 | 1.8 | 12.7093 | 0.7 | 2.1319 | 1.1 | 0.1966 | 0.9 | 0.80 | 1157 | 9  | 1159 | 8  | 1163 | 13 | 1163 | 13 | 99  |
| EC17-2 | 4  | 354 | 56061  | 2.2 | 13.9948 | 0.7 | 1.5666 | 1.0 | 0.1591 | 0.8 | 0.74 | 952  | 7  | 957  | 6  | 970  | 14 | 970  | 14 | 98  |
| EC17-2 | 5  | 262 | 35343  | 2.0 | 14.1268 | 0.9 | 1.5429 | 1.3 | 0.1581 | 1.0 | 0.77 | 946  | 9  | 948  | 8  | 950  | 18 | 950  | 18 | 100 |
| EC17-2 | 7  | 264 | 168973 | 1.4 | 12.4769 | 0.7 | 2.1897 | 1.3 | 0.1982 | 1.1 | 0.84 | 1166 | 11 | 1178 | 9  | 1200 | 13 | 1200 | 13 | 97  |
| EC17-2 | 8  | 550 | 372210 | 6.8 | 11.7383 | 0.5 | 2.6893 | 1.0 | 0.2291 | 0.8 | 0.84 | 1330 | 10 | 1326 | 7  | 1319 | 10 | 1319 | 10 | 101 |
| EC17-2 | 9  | 70  | 12771  | 1.1 | 13.7812 | 0.9 | 1.7148 | 1.4 | 0.1715 | 1.0 | 0.75 | 1020 | 10 | 1014 | 9  | 1001 | 18 | 1001 | 18 | 102 |
| EC17-2 | 10 | 85  | 28855  | 3.4 | 12.7179 | 0.9 | 1.8101 | 1.4 | 0.1670 | 1.0 | 0.74 | 996  | 10 | 1049 | 9  | 1162 | 19 | 1162 | 19 | 86  |
| EC17-2 | 11 | 191 | 93523  | 2.8 | 12.7128 | 0.5 | 2.1176 | 1.0 | 0.1953 | 0.9 | 0.86 | 1150 | 9  | 1155 | 7  | 1163 | 10 | 1163 | 10 | 99  |
| EC17-2 | 12 | 678 | 179411 | 4.1 | 13.6075 | 0.6 | 1.7679 | 1.1 | 0.1745 | 1.0 | 0.87 | 1037 | 10 | 1034 | 7  | 1027 | 12 | 1027 | 12 | 101 |
| EC17-2 | 13 | 232 | 69197  | 3.3 | 12.5324 | 0.7 | 2.2474 | 1.2 | 0.2044 | 0.9 | 0.79 | 1199 | 10 | 1196 | 8  | 1191 | 14 | 1191 | 14 | 101 |
| EC17-2 | 14 | 75  | 70778  | 0.7 | 13.5148 | 1.0 | 1.7282 | 1.5 | 0.1695 | 1.1 | 0.76 | 1009 | 11 | 1019 | 10 | 1040 | 20 | 1040 | 20 | 97  |
| EC17-2 | 16 | 89  | 96028  | 2.1 | 11.9138 | 0.8 | 2.4790 | 1.2 | 0.2143 | 0.9 | 0.73 | 1252 | 10 | 1266 | 9  | 1290 | 16 | 1290 | 16 | 97  |
| EC17-2 | 17 | 97  | 131647 | 1.5 | 10.9100 | 0.8 | 3.1801 | 1.3 | 0.2517 | 1.0 | 0.79 | 1447 | 13 | 1452 | 10 | 1459 | 15 | 1459 | 15 | 99  |
| EC17-2 | 18 | 82  | 50248  | 0.9 | 12.2090 | 0.9 | 2.3148 | 1.3 | 0.2051 | 0.9 | 0.69 | 1202 | 10 | 1217 | 9  | 1242 | 18 | 1242 | 18 | 97  |
| EC17-2 | 19 | 110 | 94501  | 2.4 | 13.4383 | 0.8 | 1.8454 | 1.1 | 0.1799 | 0.7 | 0.66 | 1067 | 7  | 1062 | 7  | 1052 | 16 | 1052 | 16 | 101 |
| EC17-2 | 20 | 482 | 43538  | 1.4 | 12.9784 | 0.7 | 1.8411 | 1.1 | 0.1734 | 0.9 | 0.79 | 1031 | 8  | 1060 | 7  | 1122 | 14 | 1122 | 14 | 92  |

|        |    |     |         |     |         |     |        |     |        |     |      |      |    |      |    |      |    |      |    |     |
|--------|----|-----|---------|-----|---------|-----|--------|-----|--------|-----|------|------|----|------|----|------|----|------|----|-----|
| EC17-2 | 21 | 537 | 181966  | 3.3 | 13.6152 | 0.5 | 1.8258 | 1.2 | 0.1804 | 1.1 | 0.90 | 1069 | 11 | 1055 | 8  | 1025 | 11 | 1025 | 11 | 104 |
| EC17-2 | 22 | 405 | 29779   | 1.3 | 12.9285 | 1.5 | 1.8354 | 1.8 | 0.1722 | 0.9 | 0.52 | 1024 | 9  | 1058 | 12 | 1129 | 30 | 1129 | 30 | 91  |
| EC17-2 | 23 | 277 | 199896  | 3.0 | 13.1922 | 0.7 | 1.8693 | 1.1 | 0.1789 | 0.9 | 0.81 | 1061 | 9  | 1070 | 8  | 1089 | 14 | 1089 | 14 | 97  |
| EC17-2 | 24 | 217 | 79253   | 3.1 | 11.6800 | 0.7 | 2.5819 | 1.1 | 0.2188 | 0.8 | 0.74 | 1276 | 9  | 1296 | 8  | 1329 | 15 | 1329 | 15 | 96  |
| EC17-2 | 25 | 231 | 143915  | 4.8 | 12.7456 | 0.6 | 2.1131 | 1.2 | 0.1954 | 1.0 | 0.87 | 1151 | 11 | 1153 | 8  | 1158 | 11 | 1158 | 11 | 99  |
| EC17-2 | 26 | 34  | 91856   | 2.6 | 13.7327 | 1.2 | 1.6874 | 1.6 | 0.1681 | 1.1 | 0.66 | 1002 | 10 | 1004 | 10 | 1008 | 24 | 1008 | 24 | 99  |
| EC17-2 | 27 | 811 | 532770  | 5.0 | 11.4230 | 0.6 | 2.8516 | 1.1 | 0.2364 | 0.9 | 0.84 | 1368 | 11 | 1369 | 8  | 1372 | 11 | 1372 | 11 | 100 |
| EC17-2 | 28 | 197 | 54617   | 4.2 | 13.5749 | 0.7 | 1.7372 | 1.1 | 0.1711 | 0.9 | 0.78 | 1018 | 8  | 1022 | 7  | 1031 | 14 | 1031 | 14 | 99  |
| EC17-2 | 29 | 59  | 43876   | 1.8 | 13.4632 | 1.0 | 1.8026 | 1.4 | 0.1761 | 0.9 | 0.67 | 1046 | 9  | 1046 | 9  | 1048 | 21 | 1048 | 21 | 100 |
| EC17-2 | 30 | 336 | 337440  | 5.3 | 12.5033 | 0.8 | 2.1082 | 1.2 | 0.1913 | 1.0 | 0.79 | 1128 | 10 | 1151 | 9  | 1196 | 15 | 1196 | 15 | 94  |
| EC17-2 | 31 | 199 | 166796  | 1.9 | 12.4781 | 0.7 | 2.2293 | 1.2 | 0.2018 | 1.0 | 0.84 | 1185 | 11 | 1190 | 8  | 1200 | 13 | 1200 | 13 | 99  |
| EC17-2 | 32 | 911 | 201234  | 2.0 | 12.4270 | 0.8 | 2.3060 | 1.3 | 0.2079 | 1.0 | 0.81 | 1218 | 12 | 1214 | 9  | 1208 | 15 | 1208 | 15 | 101 |
| EC17-2 | 33 | 76  | 29169   | 1.9 | 13.2333 | 0.8 | 1.8670 | 1.2 | 0.1793 | 0.9 | 0.73 | 1063 | 9  | 1069 | 8  | 1083 | 17 | 1083 | 17 | 98  |
| EC17-2 | 34 | 573 | 320357  | 3.7 | 13.7337 | 0.6 | 1.7701 | 1.2 | 0.1764 | 1.0 | 0.87 | 1047 | 10 | 1035 | 8  | 1008 | 12 | 1008 | 12 | 104 |
| EC17-2 | 35 | 223 | 720715  | 3.2 | 13.2320 | 0.6 | 1.7632 | 1.0 | 0.1693 | 0.9 | 0.84 | 1008 | 8  | 1032 | 7  | 1083 | 11 | 1083 | 11 | 93  |
| EC17-2 | 36 | 384 | 95280   | 4.1 | 13.5953 | 0.7 | 1.7442 | 1.1 | 0.1721 | 0.8 | 0.79 | 1023 | 8  | 1025 | 7  | 1028 | 13 | 1028 | 13 | 100 |
| EC17-2 | 37 | 511 | 707114  | 3.5 | 12.8834 | 0.6 | 1.9954 | 1.8 | 0.1865 | 1.7 | 0.95 | 1103 | 17 | 1114 | 12 | 1136 | 12 | 1136 | 12 | 97  |
| EC17-2 | 38 | 673 | 110991  | 1.9 | 13.1558 | 0.5 | 1.9266 | 1.0 | 0.1839 | 0.9 | 0.87 | 1088 | 9  | 1090 | 7  | 1094 | 10 | 1094 | 10 | 99  |
| EC17-2 | 39 | 124 | 49542   | 3.5 | 13.6461 | 0.7 | 1.7115 | 1.3 | 0.1695 | 1.1 | 0.84 | 1009 | 10 | 1013 | 8  | 1021 | 14 | 1021 | 14 | 99  |
| EC17-2 | 40 | 595 | 463291  | 3.6 | 13.3371 | 0.6 | 1.8314 | 1.3 | 0.1772 | 1.2 | 0.90 | 1052 | 11 | 1057 | 9  | 1067 | 12 | 1067 | 12 | 99  |
| EC17-2 | 41 | 157 | 29105   | 5.1 | 13.0053 | 0.7 | 2.0174 | 1.2 | 0.1904 | 1.0 | 0.80 | 1123 | 10 | 1121 | 8  | 1118 | 15 | 1118 | 15 | 101 |
| EC17-2 | 42 | 48  | 39100   | 2.2 | 13.9774 | 1.2 | 1.5448 | 1.6 | 0.1567 | 1.0 | 0.66 | 938  | 9  | 948  | 10 | 972  | 24 | 972  | 24 | 97  |
| EC17-2 | 43 | 707 | 131852  | 5.6 | 13.8927 | 0.5 | 1.6323 | 0.9 | 0.1645 | 0.8 | 0.83 | 982  | 7  | 983  | 6  | 984  | 11 | 984  | 11 | 100 |
| EC17-2 | 44 | 906 | 1374210 | 4.7 | 13.7926 | 0.6 | 1.6524 | 1.1 | 0.1654 | 0.9 | 0.84 | 987  | 8  | 990  | 7  | 999  | 12 | 999  | 12 | 99  |
| EC17-2 | 45 | 94  | 36286   | 1.2 | 13.4973 | 0.8 | 1.6950 | 1.2 | 0.1660 | 0.9 | 0.76 | 990  | 8  | 1007 | 7  | 1043 | 15 | 1043 | 15 | 95  |
| EC17-2 | 46 | 260 | 761782  | 2.3 | 12.6378 | 0.6 | 2.1181 | 1.1 | 0.1942 | 1.0 | 0.86 | 1144 | 10 | 1155 | 8  | 1174 | 11 | 1174 | 11 | 97  |
| EC17-2 | 47 | 77  | 356067  | 1.8 | 13.0756 | 0.9 | 1.8759 | 1.4 | 0.1780 | 1.1 | 0.78 | 1056 | 11 | 1073 | 10 | 1107 | 18 | 1107 | 18 | 95  |
| EC17-2 | 48 | 78  | 24486   | 1.5 | 13.5243 | 1.0 | 1.7843 | 1.4 | 0.1751 | 1.0 | 0.72 | 1040 | 10 | 1040 | 9  | 1039 | 20 | 1039 | 20 | 100 |
| EC17-2 | 49 | 183 | 105519  | 2.2 | 12.7175 | 0.8 | 2.1202 | 1.2 | 0.1956 | 0.9 | 0.77 | 1152 | 10 | 1155 | 8  | 1162 | 15 | 1162 | 15 | 99  |
| EC17-2 | 50 | 238 | 1684796 | 3.6 | 14.0085 | 0.6 | 1.4794 | 0.9 | 0.1504 | 0.6 | 0.69 | 903  | 5  | 922  | 5  | 968  | 13 | 968  | 13 | 93  |
| EC17-2 | 51 | 80  | 94712   | 3.0 | 11.1739 | 0.9 | 3.0829 | 1.2 | 0.2499 | 0.9 | 0.72 | 1438 | 12 | 1428 | 10 | 1414 | 17 | 1414 | 17 | 102 |
| EC17-2 | 52 | 114 | 79822   | 2.6 | 13.2934 | 0.7 | 1.8483 | 1.2 | 0.1783 | 1.0 | 0.81 | 1058 | 10 | 1063 | 8  | 1074 | 14 | 1074 | 14 | 98  |
| EC17-2 | 53 | 189 | 32744   | 2.2 | 13.3258 | 0.7 | 1.8485 | 1.3 | 0.1787 | 1.0 | 0.82 | 1060 | 10 | 1063 | 8  | 1069 | 15 | 1069 | 15 | 99  |
| EC17-2 | 54 | 101 | 137280  | 2.6 | 13.4628 | 0.8 | 1.7015 | 1.2 | 0.1662 | 0.9 | 0.76 | 991  | 8  | 1009 | 8  | 1048 | 16 | 1048 | 16 | 95  |
| EC17-2 | 55 | 386 | 1074010 | 1.0 | 11.5060 | 0.5 | 2.7396 | 1.1 | 0.2287 | 1.0 | 0.90 | 1328 | 12 | 1339 | 8  | 1358 | 9  | 1358 | 9  | 98  |
| EC17-2 | 56 | 323 | 1133889 | 2.5 | 13.2659 | 0.7 | 1.8521 | 1.2 | 0.1783 | 1.0 | 0.82 | 1058 | 10 | 1064 | 8  | 1078 | 14 | 1078 | 14 | 98  |
| EC17-2 | 57 | 70  | 20618   | 3.1 | 14.2692 | 1.0 | 1.4532 | 1.4 | 0.1505 | 1.0 | 0.71 | 904  | 8  | 911  | 8  | 930  | 20 | 930  | 20 | 97  |
| EC17-2 | 58 | 507 | 2698749 | 2.4 | 12.5366 | 0.6 | 2.2234 | 1.2 | 0.2022 | 1.1 | 0.86 | 1187 | 12 | 1188 | 9  | 1190 | 12 | 1190 | 12 | 100 |
| EC17-2 | 59 | 393 | 398882  | 2.9 | 13.3230 | 0.6 | 1.7965 | 1.3 | 0.1737 | 1.1 | 0.87 | 1032 | 11 | 1044 | 8  | 1069 | 12 | 1069 | 12 | 97  |
| EC17-2 | 60 | 136 | 953204  | 4.5 | 12.1150 | 0.6 | 2.3653 | 1.1 | 0.2079 | 0.9 | 0.81 | 1218 | 10 | 1232 | 8  | 1258 | 13 | 1258 | 13 | 97  |
| EC17-2 | 61 | 143 | 212821  | 1.8 | 13.5601 | 0.6 | 1.7347 | 1.1 | 0.1707 | 0.9 | 0.83 | 1016 | 9  | 1022 | 7  | 1034 | 13 | 1034 | 13 | 98  |
| EC17-2 | 62 | 300 | 92557   | 3.3 | 13.1203 | 0.7 | 1.7664 | 1.1 | 0.1682 | 0.8 | 0.77 | 1002 | 8  | 1033 | 7  | 1100 | 14 | 1100 | 14 | 91  |
| EC17-2 | 63 | 228 | 341005  | 1.7 | 12.8715 | 0.8 | 2.0668 | 1.4 | 0.1930 | 1.1 | 0.82 | 1138 | 12 | 1138 | 9  | 1138 | 15 | 1138 | 15 | 100 |
| EC17-2 | 64 | 278 | 104231  | 1.3 | 12.7320 | 0.5 | 2.1745 | 1.2 | 0.2009 | 1.0 | 0.88 | 1180 | 11 | 1173 | 8  | 1160 | 11 | 1160 | 11 | 102 |
| EC17-2 | 65 | 107 | 40576   | 3.0 | 13.2641 | 0.8 | 1.9098 | 1.2 | 0.1838 | 0.9 | 0.74 | 1088 | 9  | 1085 | 8  | 1078 | 16 | 1078 | 16 | 101 |
| EC17-2 | 66 | 311 | 233283  | 1.4 | 11.7287 | 0.6 | 2.7211 | 1.0 | 0.2316 | 0.8 | 0.80 | 1343 | 10 | 1334 | 8  | 1321 | 12 | 1321 | 12 | 102 |



|        |     |      |         |      |         |     |        |     |        |     |      |      |    |      |    |      |    |      |    |     |
|--------|-----|------|---------|------|---------|-----|--------|-----|--------|-----|------|------|----|------|----|------|----|------|----|-----|
| EC17-2 | 67  | 241  | 89589   | 1.4  | 10.7808 | 0.7 | 3.2572 | 1.2 | 0.2548 | 1.0 | 0.82 | 1463 | 13 | 1471 | 9  | 1482 | 13 | 1482 | 13 | 99  |
| EC17-2 | 68  | 207  | 68847   | 2.2  | 12.1788 | 0.7 | 2.4494 | 1.1 | 0.2164 | 0.9 | 0.79 | 1263 | 10 | 1257 | 8  | 1247 | 13 | 1247 | 13 | 101 |
| EC17-2 | 69  | 450  | 92451   | 5.1  | 12.8641 | 0.7 | 2.0453 | 1.2 | 0.1909 | 1.0 | 0.81 | 1126 | 10 | 1131 | 8  | 1139 | 14 | 1139 | 14 | 99  |
| EC17-2 | 70  | 180  | 59218   | 1.6  | 13.2168 | 0.7 | 1.8489 | 1.1 | 0.1773 | 0.8 | 0.78 | 1052 | 8  | 1063 | 7  | 1085 | 14 | 1085 | 14 | 97  |
| EC17-2 | 71  | 115  | 30806   | 2.2  | 13.6035 | 0.7 | 1.6915 | 1.0 | 0.1670 | 0.7 | 0.75 | 995  | 7  | 1005 | 6  | 1027 | 14 | 1027 | 14 | 97  |
| EC17-2 | 72  | 972  | 625328  | 3.9  | 12.1370 | 0.6 | 2.4157 | 1.1 | 0.2127 | 0.9 | 0.81 | 1243 | 10 | 1247 | 8  | 1254 | 12 | 1254 | 12 | 99  |
| EC17-2 | 73  | 140  | 62521   | 1.7  | 13.4235 | 0.6 | 1.8144 | 1.0 | 0.1767 | 0.8 | 0.80 | 1049 | 8  | 1051 | 6  | 1054 | 12 | 1054 | 12 | 100 |
| EC17-2 | 74  | 1088 | 646064  | 3.0  | 13.6043 | 0.6 | 1.7775 | 1.1 | 0.1755 | 0.9 | 0.85 | 1042 | 9  | 1037 | 7  | 1027 | 11 | 1027 | 11 | 101 |
| EC17-2 | 75  | 209  | 79118   | 1.7  | 12.3156 | 0.5 | 2.3351 | 1.2 | 0.2087 | 1.0 | 0.88 | 1222 | 11 | 1223 | 8  | 1225 | 11 | 1225 | 11 | 100 |
| EC17-2 | 76  | 73   | 43234   | 2.2  | 13.5247 | 0.8 | 1.7360 | 1.1 | 0.1704 | 0.8 | 0.71 | 1014 | 8  | 1022 | 7  | 1039 | 16 | 1039 | 16 | 98  |
| EC17-2 | 77  | 448  | 95009   | 8.0  | 13.5859 | 0.8 | 1.7436 | 1.2 | 0.1719 | 1.0 | 0.79 | 1022 | 9  | 1025 | 8  | 1030 | 15 | 1030 | 15 | 99  |
| EC17-2 | 78  | 188  | 102016  | 2.5  | 11.0586 | 0.6 | 3.1700 | 1.0 | 0.2544 | 0.8 | 0.80 | 1461 | 10 | 1450 | 8  | 1434 | 11 | 1434 | 11 | 102 |
| EC17-2 | 79  | 237  | 112446  | 5.7  | 12.0517 | 0.5 | 2.4717 | 1.2 | 0.2161 | 1.0 | 0.90 | 1261 | 12 | 1264 | 8  | 1268 | 10 | 1268 | 10 | 100 |
| EC17-2 | 80  | 232  | 3346921 | 3.7  | 12.5691 | 0.7 | 2.1108 | 1.3 | 0.1925 | 1.1 | 0.85 | 1135 | 11 | 1152 | 9  | 1185 | 13 | 1185 | 13 | 96  |
| EC17-2 | 81  | 223  | 53564   | 2.0  | 13.3533 | 0.9 | 1.8371 | 1.4 | 0.1780 | 1.1 | 0.78 | 1056 | 11 | 1059 | 9  | 1065 | 18 | 1065 | 18 | 99  |
| EC17-2 | 82  | 501  | 108850  | 2.7  | 11.4378 | 0.7 | 2.7965 | 1.3 | 0.2321 | 1.1 | 0.84 | 1345 | 14 | 1355 | 10 | 1369 | 14 | 1369 | 14 | 98  |
| EC17-2 | 83  | 557  | 433496  | 3.4  | 12.9813 | 0.5 | 2.0209 | 1.0 | 0.1903 | 0.9 | 0.89 | 1123 | 9  | 1123 | 7  | 1121 | 9  | 1121 | 9  | 100 |
| EC17-2 | 84  | 244  | 162274  | 1.7  | 13.2241 | 0.6 | 1.8451 | 1.1 | 0.1770 | 1.0 | 0.87 | 1051 | 10 | 1062 | 8  | 1084 | 11 | 1084 | 11 | 97  |
| EC17-2 | 85  | 455  | 143764  | 10.4 | 13.3835 | 0.7 | 1.8911 | 1.2 | 0.1836 | 1.0 | 0.81 | 1087 | 10 | 1078 | 8  | 1060 | 14 | 1060 | 14 | 103 |
| EC17-2 | 86  | 763  | 464480  | 2.9  | 12.8878 | 0.7 | 2.1391 | 1.0 | 0.2000 | 0.7 | 0.71 | 1175 | 7  | 1162 | 7  | 1136 | 13 | 1136 | 13 | 104 |
| EC17-2 | 87  | 43   | 20641   | 2.1  | 12.8154 | 0.9 | 2.0515 | 1.3 | 0.1908 | 1.0 | 0.75 | 1125 | 10 | 1133 | 9  | 1147 | 17 | 1147 | 17 | 98  |
| EC17-2 | 88  | 27   | 8930    | 3.8  | 13.8249 | 1.4 | 1.6645 | 1.7 | 0.1670 | 1.0 | 0.56 | 995  | 9  | 995  | 11 | 994  | 29 | 994  | 29 | 100 |
| EC17-2 | 89  | 175  | 1207231 | 3.1  | 13.4722 | 0.8 | 1.7612 | 1.1 | 0.1722 | 0.8 | 0.72 | 1024 | 8  | 1031 | 7  | 1047 | 16 | 1047 | 16 | 98  |
| EC17-2 | 90  | 242  | 98532   | 2.5  | 13.5135 | 0.6 | 1.7335 | 1.1 | 0.1700 | 0.9 | 0.81 | 1012 | 8  | 1021 | 7  | 1041 | 13 | 1041 | 13 | 97  |
| EC17-2 | 91  | 364  | 189864  | 4.1  | 13.6954 | 0.7 | 1.7876 | 1.3 | 0.1776 | 1.1 | 0.84 | 1054 | 10 | 1041 | 8  | 1014 | 14 | 1014 | 14 | 104 |
| EC17-2 | 92  | 406  | 233584  | 3.3  | 10.8077 | 0.6 | 3.4066 | 1.2 | 0.2671 | 1.0 | 0.86 | 1526 | 14 | 1506 | 10 | 1477 | 12 | 1477 | 12 | 103 |
| EC17-2 | 93  | 207  | 65474   | 1.9  | 14.0327 | 0.8 | 1.6569 | 1.3 | 0.1687 | 1.0 | 0.77 | 1005 | 9  | 992  | 8  | 964  | 17 | 964  | 17 | 104 |
| EC17-2 | 94  | 657  | 147189  | 21.4 | 13.4981 | 0.6 | 1.8281 | 1.1 | 0.1790 | 1.0 | 0.84 | 1062 | 9  | 1056 | 7  | 1043 | 12 | 1043 | 12 | 102 |
| EC17-2 | 95  | 265  | 69297   | 2.0  | 12.7675 | 0.7 | 2.1482 | 1.3 | 0.1990 | 1.1 | 0.86 | 1170 | 12 | 1164 | 9  | 1154 | 13 | 1154 | 13 | 101 |
| EC17-2 | 96  | 345  | 125953  | 1.2  | 13.5048 | 0.5 | 1.8708 | 0.9 | 0.1833 | 0.7 | 0.82 | 1085 | 7  | 1071 | 6  | 1042 | 11 | 1042 | 11 | 104 |
| EC17-2 | 97  | 147  | 45666   | 2.8  | 12.5723 | 0.6 | 2.2877 | 1.1 | 0.2087 | 0.9 | 0.81 | 1222 | 10 | 1208 | 8  | 1185 | 12 | 1185 | 12 | 103 |
| EC17-2 | 98  | 195  | 119621  | 3.7  | 13.5727 | 0.6 | 1.7677 | 1.0 | 0.1741 | 0.7 | 0.76 | 1035 | 7  | 1034 | 6  | 1032 | 12 | 1032 | 12 | 100 |
| EC17-2 | 99  | 61   | 27662   | 1.3  | 12.2254 | 0.9 | 2.3118 | 1.3 | 0.2051 | 1.0 | 0.74 | 1203 | 11 | 1216 | 9  | 1240 | 17 | 1240 | 17 | 97  |
| EC17-2 | 100 | 64   | 71605   | 1.8  | 13.3095 | 0.9 | 1.8066 | 1.4 | 0.1745 | 1.0 | 0.75 | 1037 | 10 | 1048 | 9  | 1071 | 18 | 1071 | 18 | 97  |
| EC17-2 | 101 | 107  | 70130   | 1.2  | 13.3903 | 0.8 | 1.8213 | 1.1 | 0.1769 | 0.8 | 0.68 | 1050 | 8  | 1053 | 7  | 1059 | 17 | 1059 | 17 | 99  |
| EC17-2 | 102 | 281  | 270146  | 3.0  | 12.7338 | 0.7 | 2.0830 | 1.3 | 0.1925 | 1.1 | 0.83 | 1135 | 11 | 1143 | 9  | 1159 | 14 | 1159 | 14 | 98  |
| EC17-2 | 103 | 165  | 64285   | 4.1  | 14.1094 | 0.7 | 1.6124 | 1.0 | 0.1651 | 0.8 | 0.73 | 985  | 7  | 975  | 6  | 953  | 14 | 953  | 14 | 103 |
| EC17-2 | 104 | 50   | 117921  | 1.2  | 12.4284 | 1.0 | 2.3379 | 1.3 | 0.2108 | 0.8 | 0.64 | 1233 | 9  | 1224 | 9  | 1207 | 20 | 1207 | 20 | 102 |
| EC17-2 | 105 | 119  | 158838  | 1.2  | 12.8074 | 0.7 | 2.1359 | 1.2 | 0.1985 | 1.0 | 0.83 | 1167 | 11 | 1161 | 8  | 1148 | 13 | 1148 | 13 | 102 |
| EC17-2 | 106 | 386  | 90800   | 3.0  | 13.3932 | 0.6 | 1.7767 | 1.4 | 0.1727 | 1.2 | 0.90 | 1027 | 12 | 1037 | 9  | 1059 | 12 | 1059 | 12 | 97  |
| EC17-2 | 107 | 910  | 770075  | 6.1  | 13.6322 | 0.6 | 1.7703 | 1.2 | 0.1751 | 1.0 | 0.88 | 1040 | 10 | 1035 | 8  | 1023 | 11 | 1023 | 11 | 102 |
| EC17-2 | 108 | 81   | 197571  | 3.7  | 14.2947 | 1.0 | 1.5135 | 3.0 | 0.1570 | 2.8 | 0.94 | 940  | 25 | 936  | 18 | 926  | 20 | 926  | 20 | 101 |
| EC17-2 | 109 | 393  | 1090437 | 4.2  | 12.3448 | 0.6 | 2.4304 | 1.0 | 0.2177 | 0.8 | 0.81 | 1270 | 9  | 1252 | 7  | 1221 | 11 | 1221 | 11 | 104 |
| EC17-2 | 110 | 149  | 85864   | 2.9  | 12.2973 | 0.8 | 2.3334 | 1.5 | 0.2082 | 1.3 | 0.85 | 1219 | 14 | 1223 | 11 | 1228 | 16 | 1228 | 16 | 99  |
| EC17-2 | 111 | 725  | 252165  | 2.4  | 12.7075 | 0.7 | 2.1747 | 1.2 | 0.2005 | 1.0 | 0.82 | 1178 | 11 | 1173 | 9  | 1164 | 14 | 1164 | 14 | 101 |
| EC17-2 | 112 | 347  | 1449276 | 2.0  | 11.6746 | 0.5 | 2.6361 | 1.4 | 0.2233 | 1.3 | 0.93 | 1299 | 16 | 1311 | 11 | 1330 | 10 | 1330 | 10 | 98  |

|        |     |      |         |      |         |     |        |     |        |     |      |      |    |      |    |      |    |      |    |     |
|--------|-----|------|---------|------|---------|-----|--------|-----|--------|-----|------|------|----|------|----|------|----|------|----|-----|
| EC17-2 | 113 | 480  | 304917  | 4.5  | 12.9539 | 0.7 | 2.1212 | 1.4 | 0.1994 | 1.3 | 0.89 | 1172 | 14 | 1156 | 10 | 1125 | 13 | 1125 | 13 | 104 |
| EC17-2 | 114 | 588  | 348466  | 6.4  | 13.7268 | 0.7 | 1.7178 | 1.1 | 0.1711 | 0.9 | 0.81 | 1018 | 9  | 1015 | 7  | 1009 | 13 | 1009 | 13 | 101 |
| EC17-2 | 115 | 363  | 186225  | 3.2  | 12.8126 | 0.8 | 2.1460 | 1.5 | 0.1995 | 1.3 | 0.85 | 1173 | 14 | 1164 | 10 | 1147 | 16 | 1147 | 16 | 102 |
| EC17-2 | 116 | 231  | 116229  | 1.4  | 12.2977 | 0.6 | 2.3330 | 1.1 | 0.2082 | 0.9 | 0.81 | 1219 | 10 | 1222 | 8  | 1228 | 12 | 1228 | 12 | 99  |
| EC17-2 | 117 | 178  | 108578  | 1.7  | 10.9497 | 0.6 | 3.1332 | 1.1 | 0.2489 | 0.9 | 0.81 | 1433 | 11 | 1441 | 8  | 1453 | 12 | 1453 | 12 | 99  |
| EC17-2 | 118 | 68   | 29254   | 2.8  | 13.6746 | 0.9 | 1.7752 | 1.2 | 0.1761 | 0.9 | 0.71 | 1046 | 8  | 1036 | 8  | 1017 | 18 | 1017 | 18 | 103 |
| EC17-2 | 119 | 206  | 512226  | 5.7  | 11.8651 | 0.8 | 2.5625 | 1.3 | 0.2206 | 0.9 | 0.74 | 1285 | 11 | 1290 | 9  | 1298 | 16 | 1298 | 16 | 99  |
| EC17-2 | 120 | 167  | 161248  | 1.2  | 13.6811 | 0.7 | 1.7786 | 1.2 | 0.1766 | 0.9 | 0.78 | 1048 | 9  | 1038 | 8  | 1016 | 15 | 1016 | 15 | 103 |
| EC17-2 | 121 | 226  | 47078   | 3.6  | 12.3862 | 0.7 | 2.2340 | 1.3 | 0.2008 | 1.1 | 0.85 | 1179 | 12 | 1192 | 9  | 1214 | 13 | 1214 | 13 | 97  |
| EC17-2 | 122 | 352  | 139952  | 1.4  | 12.6589 | 0.6 | 2.1879 | 1.1 | 0.2010 | 0.9 | 0.85 | 1180 | 10 | 1177 | 8  | 1171 | 11 | 1171 | 11 | 101 |
| EC17-2 | 123 | 595  | 226064  | 9.8  | 13.6566 | 0.6 | 1.8155 | 1.1 | 0.1799 | 0.9 | 0.82 | 1066 | 9  | 1051 | 7  | 1019 | 12 | 1019 | 12 | 105 |
| EC17-2 | 124 | 258  | 1759408 | 2.8  | 12.6271 | 0.7 | 2.1448 | 1.0 | 0.1965 | 0.8 | 0.74 | 1157 | 8  | 1163 | 7  | 1176 | 14 | 1176 | 14 | 98  |
| EC17-2 | 125 | 154  | 512470  | 2.3  | 12.6190 | 0.6 | 2.0978 | 1.2 | 0.1921 | 1.0 | 0.86 | 1133 | 10 | 1148 | 8  | 1177 | 12 | 1177 | 12 | 96  |
| EC17-2 | 126 | 264  | 239865  | 0.9  | 16.1719 | 0.7 | 0.9218 | 1.3 | 0.1082 | 1.1 | 0.83 | 662  | 7  | 663  | 6  | 668  | 16 | 662  | 7  | 99  |
| EC17-2 | 127 | 190  | 111922  | 2.0  | 13.9200 | 0.8 | 1.6704 | 1.3 | 0.1687 | 1.1 | 0.82 | 1005 | 10 | 997  | 9  | 981  | 16 | 981  | 16 | 102 |
| EC17-2 | 128 | 1148 | 809492  | 3.6  | 12.0829 | 0.6 | 2.5172 | 1.0 | 0.2207 | 0.8 | 0.80 | 1286 | 9  | 1277 | 7  | 1263 | 12 | 1263 | 12 | 102 |
| EC17-2 | 129 | 62   | 221824  | 1.2  | 13.0740 | 1.3 | 1.8205 | 1.7 | 0.1727 | 1.1 | 0.62 | 1027 | 10 | 1053 | 11 | 1107 | 27 | 1107 | 27 | 93  |
| EC17-2 | 130 | 298  | 427827  | 2.2  | 12.6745 | 0.6 | 2.1807 | 1.1 | 0.2005 | 0.9 | 0.82 | 1178 | 9  | 1175 | 7  | 1169 | 12 | 1169 | 12 | 101 |
| EC17-2 | 131 | 395  | 133959  | 2.3  | 12.3288 | 0.6 | 2.3211 | 1.3 | 0.2076 | 1.2 | 0.88 | 1216 | 13 | 1219 | 10 | 1223 | 13 | 1223 | 13 | 99  |
| EC17-2 | 132 | 545  | 644654  | 5.1  | 13.4732 | 0.5 | 1.8161 | 1.3 | 0.1775 | 1.2 | 0.91 | 1054 | 11 | 1051 | 9  | 1047 | 11 | 1047 | 11 | 101 |
| EC17-2 | 133 | 138  | 64305   | 4.7  | 12.4915 | 0.7 | 2.1644 | 1.4 | 0.1962 | 1.2 | 0.86 | 1155 | 12 | 1170 | 10 | 1197 | 14 | 1197 | 14 | 96  |
| EC17-2 | 134 | 217  | 48751   | 3.1  | 12.2959 | 0.7 | 2.3668 | 1.2 | 0.2112 | 1.0 | 0.81 | 1235 | 11 | 1233 | 8  | 1229 | 14 | 1229 | 14 | 101 |
| EC17-2 | 135 | 288  | 140831  | 2.0  | 13.9436 | 0.7 | 1.6518 | 1.2 | 0.1671 | 0.9 | 0.80 | 996  | 9  | 990  | 7  | 977  | 14 | 977  | 14 | 102 |
| EC17-2 | 136 | 90   | 321400  | 1.8  | 13.1502 | 1.1 | 1.8701 | 1.4 | 0.1784 | 0.9 | 0.62 | 1058 | 9  | 1071 | 10 | 1095 | 23 | 1095 | 23 | 97  |
| EC17-2 | 137 | 127  | 57389   | 3.9  | 13.3822 | 0.7 | 1.8926 | 1.2 | 0.1838 | 0.9 | 0.78 | 1088 | 9  | 1078 | 8  | 1060 | 15 | 1060 | 15 | 103 |
| EC17-2 | 138 | 101  | 60992   | 2.1  | 12.6413 | 2.5 | 1.9290 | 2.7 | 0.1769 | 1.1 | 0.39 | 1050 | 10 | 1091 | 18 | 1174 | 49 | 1174 | 49 | 89  |
| EC17-2 | 139 | 136  | 98337   | 2.5  | 13.2610 | 0.7 | 1.8294 | 1.3 | 0.1760 | 1.1 | 0.84 | 1045 | 10 | 1056 | 8  | 1079 | 14 | 1079 | 14 | 97  |
| EC17-2 | 140 | 69   | 35558   | 2.3  | 13.4316 | 0.9 | 1.8012 | 1.3 | 0.1755 | 0.9 | 0.70 | 1043 | 9  | 1046 | 8  | 1053 | 19 | 1053 | 19 | 99  |
| EC17-2 | 141 | 250  | 505542  | 4.5  | 11.1849 | 0.7 | 2.9824 | 1.3 | 0.2420 | 1.1 | 0.85 | 1397 | 14 | 1403 | 10 | 1412 | 13 | 1412 | 13 | 99  |
| EC17-2 | 142 | 502  | 720196  | 3.1  | 12.9118 | 0.6 | 2.1204 | 1.2 | 0.1987 | 1.1 | 0.87 | 1168 | 11 | 1155 | 8  | 1132 | 12 | 1132 | 12 | 103 |
| EC17-2 | 144 | 58   | 584845  | 2.0  | 14.1486 | 1.0 | 1.6119 | 1.4 | 0.1655 | 1.0 | 0.69 | 987  | 9  | 975  | 9  | 947  | 21 | 947  | 21 | 104 |
| EC17-2 | 145 | 312  | 55007   | 1.4  | 13.4223 | 0.7 | 1.8655 | 1.5 | 0.1817 | 1.3 | 0.88 | 1076 | 13 | 1069 | 10 | 1054 | 14 | 1054 | 14 | 102 |
| EC17-2 | 146 | 388  | 1788397 | 2.6  | 10.6415 | 0.6 | 3.3870 | 1.0 | 0.2615 | 0.8 | 0.81 | 1498 | 11 | 1501 | 8  | 1507 | 11 | 1507 | 11 | 99  |
| EC17-2 | 147 | 547  | 2625144 | 3.7  | 13.6949 | 0.7 | 1.7821 | 1.3 | 0.1771 | 1.1 | 0.86 | 1051 | 11 | 1039 | 8  | 1014 | 14 | 1014 | 14 | 104 |
| EC17-2 | 148 | 275  | 66137   | 3.9  | 13.7046 | 0.5 | 1.6847 | 1.0 | 0.1675 | 0.8 | 0.85 | 998  | 8  | 1003 | 6  | 1012 | 11 | 1012 | 11 | 99  |
| EC17-2 | 149 | 203  | 591844  | 2.0  | 12.2171 | 0.7 | 2.3369 | 1.2 | 0.2072 | 0.9 | 0.78 | 1214 | 10 | 1224 | 8  | 1241 | 15 | 1241 | 15 | 98  |
| EC17-2 | 150 | 408  | 247415  | 2.2  | 12.7627 | 0.6 | 2.1304 | 1.2 | 0.1973 | 1.0 | 0.88 | 1161 | 11 | 1159 | 8  | 1155 | 11 | 1155 | 11 | 100 |
| EC17-2 | 151 | 504  | 308951  | 3.3  | 12.5701 | 0.6 | 2.2003 | 1.3 | 0.2007 | 1.1 | 0.87 | 1179 | 12 | 1181 | 9  | 1185 | 12 | 1185 | 12 | 99  |
| EC17-2 | 152 | 131  | 100555  | 2.1  | 13.4672 | 0.9 | 1.8186 | 1.2 | 0.1777 | 0.8 | 0.69 | 1054 | 8  | 1052 | 8  | 1048 | 18 | 1048 | 18 | 101 |
| EC17-2 | 153 | 609  | 183687  | 2.8  | 13.8066 | 0.7 | 1.6812 | 1.1 | 0.1684 | 0.8 | 0.76 | 1003 | 8  | 1001 | 7  | 997  | 15 | 997  | 15 | 101 |
| EC17-2 | 154 | 133  | 80641   | 6.6  | 13.9155 | 0.7 | 1.6863 | 1.1 | 0.1703 | 0.8 | 0.73 | 1014 | 7  | 1003 | 7  | 981  | 15 | 981  | 15 | 103 |
| EC17-2 | 155 | 69   | 22505   | 2.5  | 13.5797 | 1.0 | 1.6994 | 1.3 | 0.1675 | 0.9 | 0.69 | 998  | 9  | 1008 | 9  | 1031 | 19 | 1031 | 19 | 97  |
| EC17-2 | 156 | 933  | 550425  | 42.5 | 13.3814 | 0.5 | 1.8918 | 1.0 | 0.1837 | 0.9 | 0.89 | 1087 | 9  | 1078 | 7  | 1060 | 9  | 1060 | 9  | 103 |
| EC17-2 | 157 | 305  | 108278  | 2.6  | 13.4809 | 0.8 | 1.7854 | 1.2 | 0.1746 | 0.9 | 0.74 | 1038 | 9  | 1040 | 8  | 1045 | 16 | 1045 | 16 | 99  |
| EC17-2 | 158 | 477  | 153136  | 2.4  | 12.4660 | 0.6 | 2.3102 | 1.1 | 0.2090 | 0.9 | 0.86 | 1223 | 10 | 1215 | 8  | 1201 | 11 | 1201 | 11 | 102 |
| EC17-2 | 159 | 77   | 21420   | 3.1  | 14.3451 | 1.0 | 1.4578 | 1.5 | 0.1517 | 1.1 | 0.75 | 911  | 9  | 913  | 9  | 919  | 20 | 919  | 20 | 99  |

|        |     |     |        |     |         |     |        |     |        |     |      |      |    |      |    |      |    |      |    |     |
|--------|-----|-----|--------|-----|---------|-----|--------|-----|--------|-----|------|------|----|------|----|------|----|------|----|-----|
| EC17-2 | 160 | 103 | 132761 | 2.3 | 12.6533 | 0.6 | 2.2031 | 1.6 | 0.2023 | 1.5 | 0.93 | 1187 | 16 | 1182 | 11 | 1172 | 11 | 1172 | 11 | 101 |
| EC17-2 | 161 | 82  | 82710  | 2.3 | 13.6238 | 0.8 | 1.7288 | 1.2 | 0.1709 | 0.8 | 0.70 | 1017 | 8  | 1019 | 7  | 1024 | 17 | 1024 | 17 | 99  |
| EC17-2 | 162 | 350 | 135421 | 3.6 | 13.6128 | 0.6 | 1.7760 | 1.1 | 0.1754 | 0.8 | 0.80 | 1042 | 8  | 1037 | 7  | 1026 | 13 | 1026 | 13 | 102 |
| EC17-2 | 163 | 422 | 302676 | 1.7 | 11.0074 | 0.5 | 3.1139 | 1.2 | 0.2487 | 1.1 | 0.89 | 1432 | 14 | 1436 | 9  | 1443 | 10 | 1443 | 10 | 99  |
| EC17-2 | 164 | 70  | 22994  | 2.3 | 12.7154 | 1.1 | 2.0624 | 1.5 | 0.1903 | 1.1 | 0.70 | 1123 | 11 | 1136 | 10 | 1162 | 21 | 1162 | 21 | 97  |
| EC17-2 | 165 | 208 | 113493 | 3.5 | 13.5766 | 0.7 | 1.7383 | 1.4 | 0.1712 | 1.2 | 0.85 | 1019 | 11 | 1023 | 9  | 1031 | 15 | 1031 | 15 | 99  |
| EC17-2 | 166 | 384 | 323760 | 2.5 | 12.7522 | 0.6 | 2.1355 | 1.0 | 0.1976 | 0.9 | 0.82 | 1162 | 9  | 1160 | 7  | 1157 | 12 | 1157 | 12 | 101 |
| EC17-2 | 167 | 218 | 201701 | 3.2 | 12.6553 | 0.7 | 2.1668 | 1.2 | 0.1990 | 1.0 | 0.82 | 1170 | 11 | 1170 | 8  | 1172 | 14 | 1172 | 14 | 100 |
| EC17-2 | 168 | 360 | 158924 | 2.1 | 13.6105 | 0.6 | 1.7264 | 1.1 | 0.1705 | 0.9 | 0.83 | 1015 | 9  | 1018 | 7  | 1026 | 13 | 1026 | 13 | 99  |
| EC17-2 | 169 | 328 | 342679 | 2.9 | 13.2784 | 0.8 | 1.8211 | 1.3 | 0.1755 | 1.0 | 0.79 | 1042 | 10 | 1053 | 9  | 1076 | 16 | 1076 | 16 | 97  |
| EC17-2 | 170 | 114 | 98016  | 2.7 | 12.0138 | 0.8 | 2.3639 | 1.3 | 0.2061 | 1.1 | 0.79 | 1208 | 12 | 1232 | 10 | 1274 | 16 | 1274 | 16 | 95  |
| EC17-2 | 171 | 320 | 62739  | 3.3 | 13.6432 | 0.7 | 1.8251 | 1.2 | 0.1807 | 1.0 | 0.82 | 1071 | 10 | 1055 | 8  | 1021 | 14 | 1021 | 14 | 105 |
| EC17-2 | 172 | 261 | 140616 | 2.0 | 13.5617 | 0.6 | 1.7882 | 1.1 | 0.1760 | 0.9 | 0.84 | 1045 | 9  | 1041 | 7  | 1033 | 12 | 1033 | 12 | 101 |
| EC17-2 | 173 | 342 | 253282 | 2.0 | 12.7554 | 0.5 | 2.1034 | 0.9 | 0.1947 | 0.7 | 0.80 | 1147 | 7  | 1150 | 6  | 1156 | 11 | 1156 | 11 | 99  |
| EC17-2 | 174 | 115 | 116291 | 4.3 | 12.2561 | 0.6 | 2.3628 | 1.0 | 0.2101 | 0.8 | 0.79 | 1229 | 9  | 1231 | 7  | 1235 | 12 | 1235 | 12 | 100 |
| EC17-2 | 175 | 86  | 73515  | 3.0 | 12.7961 | 0.8 | 2.1189 | 1.2 | 0.1967 | 0.9 | 0.75 | 1158 | 9  | 1155 | 8  | 1150 | 16 | 1150 | 16 | 101 |
| EC17-2 | 176 | 211 | 96811  | 2.0 | 16.6215 | 0.8 | 0.8569 | 1.0 | 0.1033 | 0.7 | 0.67 | 634  | 4  | 628  | 5  | 608  | 16 | 634  | 4  | 104 |
| EC17-2 | 177 | 100 | 101444 | 2.8 | 12.7808 | 0.6 | 2.1634 | 1.2 | 0.2006 | 1.0 | 0.83 | 1179 | 10 | 1169 | 8  | 1152 | 13 | 1152 | 13 | 102 |
| EC17-2 | 178 | 836 | 66460  | 5.1 | 14.2405 | 0.5 | 1.4466 | 1.0 | 0.1495 | 0.9 | 0.85 | 898  | 7  | 908  | 6  | 934  | 11 | 934  | 11 | 96  |
| EC17-2 | 179 | 177 | 156475 | 2.5 | 12.8112 | 0.7 | 2.0186 | 1.1 | 0.1876 | 0.9 | 0.77 | 1109 | 9  | 1122 | 8  | 1147 | 14 | 1147 | 14 | 97  |
| EC17-2 | 180 | 289 | 325581 | 1.6 | 13.4326 | 0.5 | 1.8236 | 1.1 | 0.1777 | 0.9 | 0.87 | 1055 | 9  | 1054 | 7  | 1053 | 11 | 1053 | 11 | 100 |
| EC17-2 | 181 | 264 | 75441  | 2.0 | 13.7658 | 0.8 | 1.7159 | 1.4 | 0.1714 | 1.1 | 0.81 | 1020 | 11 | 1015 | 9  | 1003 | 16 | 1003 | 16 | 102 |
| EC17-2 | 182 | 27  | 12827  | 1.4 | 13.8197 | 1.3 | 1.7335 | 1.7 | 0.1738 | 1.0 | 0.62 | 1033 | 10 | 1021 | 11 | 995  | 27 | 995  | 27 | 104 |
| EC17-2 | 183 | 58  | 14493  | 2.3 | 13.8485 | 0.9 | 1.6887 | 1.2 | 0.1697 | 0.8 | 0.65 | 1010 | 7  | 1004 | 8  | 991  | 19 | 991  | 19 | 102 |
| EC17-2 | 184 | 339 | 201454 | 2.5 | 13.5798 | 0.6 | 1.7419 | 1.0 | 0.1716 | 0.8 | 0.82 | 1021 | 8  | 1024 | 7  | 1031 | 12 | 1031 | 12 | 99  |
| EC17-2 | 185 | 194 | 98128  | 5.7 | 13.5925 | 0.9 | 1.7033 | 1.3 | 0.1680 | 1.0 | 0.75 | 1001 | 9  | 1010 | 8  | 1029 | 17 | 1029 | 17 | 97  |
| EC17-2 | 186 | 112 | 36824  | 1.3 | 12.1142 | 1.4 | 1.9478 | 1.6 | 0.1712 | 0.9 | 0.54 | 1019 | 8  | 1098 | 11 | 1258 | 27 | 1258 | 27 | 81  |
| EC17-2 | 187 | 237 | 383149 | 1.5 | 10.0506 | 0.5 | 4.0317 | 1.0 | 0.2940 | 0.9 | 0.87 | 1662 | 12 | 1641 | 8  | 1614 | 9  | 1614 | 9  | 103 |
| EC17-2 | 188 | 122 | 126348 | 2.6 | 12.8480 | 0.7 | 2.1325 | 1.3 | 0.1988 | 1.1 | 0.85 | 1169 | 12 | 1159 | 9  | 1142 | 14 | 1142 | 14 | 102 |
| EC17-2 | 189 | 343 | 133119 | 3.5 | 12.7915 | 0.6 | 2.0886 | 1.1 | 0.1938 | 1.0 | 0.83 | 1142 | 10 | 1145 | 8  | 1150 | 12 | 1150 | 12 | 99  |
| EC17-2 | 190 | 175 | 95759  | 4.1 | 13.6927 | 0.9 | 1.7320 | 1.4 | 0.1721 | 1.1 | 0.79 | 1024 | 11 | 1021 | 9  | 1014 | 17 | 1014 | 17 | 101 |
| EC17-2 | 191 | 166 | 503308 | 2.6 | 12.2633 | 0.7 | 2.3311 | 1.1 | 0.2074 | 0.9 | 0.80 | 1215 | 10 | 1222 | 8  | 1234 | 13 | 1234 | 13 | 98  |
| EC17-2 | 192 | 129 | 539663 | 3.2 | 12.3313 | 0.7 | 2.3724 | 1.2 | 0.2123 | 1.0 | 0.80 | 1241 | 11 | 1234 | 9  | 1223 | 14 | 1223 | 14 | 101 |
| EC17-2 | 193 | 564 | 238341 | 7.1 | 13.6988 | 0.5 | 1.7153 | 0.9 | 0.1705 | 0.8 | 0.87 | 1015 | 8  | 1014 | 6  | 1013 | 9  | 1013 | 9  | 100 |
| EC17-2 | 195 | 210 | 421784 | 2.5 | 13.5242 | 0.7 | 1.7603 | 1.2 | 0.1727 | 1.0 | 0.81 | 1027 | 9  | 1031 | 8  | 1039 | 14 | 1039 | 14 | 99  |
| EC17-2 | 196 | 52  | 27862  | 1.4 | 13.3275 | 1.5 | 1.8630 | 1.8 | 0.1802 | 1.0 | 0.57 | 1068 | 10 | 1068 | 12 | 1069 | 30 | 1069 | 30 | 100 |
| EC17-2 | 197 | 337 | 92513  | 3.4 | 12.8296 | 0.7 | 2.1087 | 1.2 | 0.1963 | 1.0 | 0.81 | 1155 | 11 | 1152 | 9  | 1145 | 15 | 1145 | 15 | 101 |
| EC17-2 | 198 | 76  | 43210  | 2.6 | 11.7486 | 0.8 | 2.7421 | 1.4 | 0.2338 | 1.1 | 0.82 | 1354 | 14 | 1340 | 10 | 1317 | 15 | 1317 | 15 | 103 |
| EC17-2 | 199 | 144 | 61206  | 3.3 | 11.0935 | 0.6 | 3.2198 | 1.1 | 0.2592 | 0.9 | 0.82 | 1486 | 11 | 1462 | 8  | 1428 | 12 | 1428 | 12 | 104 |
| EC17-2 | 200 | 717 | 152119 | 2.9 | 11.7681 | 0.6 | 2.6702 | 1.3 | 0.2280 | 1.2 | 0.91 | 1324 | 15 | 1320 | 10 | 1314 | 11 | 1314 | 11 | 101 |
| EC17-2 | 201 | 601 | 402525 | 1.4 | 12.8626 | 0.5 | 2.1199 | 1.1 | 0.1978 | 1.0 | 0.90 | 1164 | 11 | 1155 | 8  | 1140 | 9  | 1140 | 9  | 102 |
| EC17-2 | 202 | 177 | 432926 | 3.3 | 13.6608 | 0.9 | 1.7086 | 1.3 | 0.1694 | 0.9 | 0.69 | 1009 | 8  | 1012 | 8  | 1019 | 19 | 1019 | 19 | 99  |
| EC17-2 | 203 | 110 | 91849  | 3.1 | 11.6938 | 0.5 | 2.5975 | 1.1 | 0.2204 | 1.0 | 0.88 | 1284 | 12 | 1300 | 8  | 1326 | 10 | 1326 | 10 | 97  |
| EC17-2 | 204 | 94  | 72665  | 3.7 | 13.1188 | 0.8 | 1.9604 | 1.5 | 0.1866 | 1.3 | 0.84 | 1103 | 13 | 1102 | 10 | 1100 | 17 | 1100 | 17 | 100 |
| EC17-2 | 205 | 536 | 155243 | 4.0 | 12.6845 | 0.7 | 2.1760 | 1.4 | 0.2003 | 1.2 | 0.88 | 1177 | 13 | 1173 | 10 | 1167 | 13 | 1167 | 13 | 101 |
| EC17-2 | 206 | 158 | 72123  | 3.8 | 11.5451 | 0.9 | 2.6697 | 1.5 | 0.2236 | 1.2 | 0.81 | 1301 | 14 | 1320 | 11 | 1351 | 17 | 1351 | 17 | 96  |

|        |     |      |         |      |         |     |         |     |        |     |      |      |    |      |    |      |    |      |    |     |
|--------|-----|------|---------|------|---------|-----|---------|-----|--------|-----|------|------|----|------|----|------|----|------|----|-----|
| EC17-2 | 207 | 83   | 181139  | 2.4  | 5.4910  | 0.6 | 13.2286 | 0.9 | 0.5270 | 0.6 | 0.70 | 2729 | 14 | 2696 | 8  | 2672 | 10 | 2672 | 10 | 102 |
| EC17-2 | 208 | 382  | 148345  | 3.2  | 12.8259 | 0.6 | 2.1211  | 1.1 | 0.1974 | 1.0 | 0.86 | 1161 | 10 | 1156 | 8  | 1145 | 11 | 1145 | 11 | 101 |
| EC17-2 | 209 | 56   | 36935   | 1.6  | 13.3895 | 0.9 | 1.7096  | 1.3 | 0.1661 | 0.9 | 0.69 | 991  | 8  | 1012 | 8  | 1059 | 19 | 1059 | 19 | 94  |
| EC17-2 | 210 | 102  | 124080  | 2.8  | 14.4245 | 0.9 | 1.4348  | 1.3 | 0.1502 | 0.9 | 0.70 | 902  | 8  | 904  | 8  | 908  | 19 | 908  | 19 | 99  |
| EC17-2 | 211 | 365  | 760291  | 3.2  | 12.8769 | 0.7 | 2.1210  | 1.3 | 0.1982 | 1.0 | 0.82 | 1166 | 11 | 1156 | 9  | 1137 | 14 | 1137 | 14 | 102 |
| EC17-2 | 212 | 51   | 38438   | 2.9  | 12.8471 | 0.9 | 2.1730  | 1.4 | 0.2026 | 1.1 | 0.76 | 1189 | 12 | 1172 | 10 | 1142 | 19 | 1142 | 19 | 104 |
| EC17-2 | 213 | 80   | 152142  | 2.3  | 13.8182 | 1.2 | 1.6000  | 1.5 | 0.1604 | 0.9 | 0.59 | 959  | 8  | 970  | 9  | 995  | 25 | 995  | 25 | 96  |
| EC17-2 | 214 | 178  | 217734  | 2.9  | 13.8263 | 0.8 | 1.6480  | 1.2 | 0.1653 | 0.9 | 0.74 | 986  | 8  | 989  | 8  | 994  | 17 | 994  | 17 | 99  |
| EC17-2 | 215 | 591  | 194974  | 1.2  | 13.6517 | 0.5 | 1.7973  | 1.3 | 0.1780 | 1.2 | 0.91 | 1056 | 11 | 1044 | 8  | 1020 | 11 | 1020 | 11 | 104 |
| EC17-2 | 216 | 221  | 166129  | 1.1  | 12.6570 | 0.8 | 2.0995  | 1.2 | 0.1928 | 0.9 | 0.74 | 1137 | 9  | 1149 | 8  | 1171 | 16 | 1171 | 16 | 97  |
| EC17-2 | 217 | 79   | 1697335 | 2.2  | 13.2301 | 1.0 | 1.8869  | 1.4 | 0.1811 | 1.1 | 0.75 | 1073 | 11 | 1077 | 10 | 1083 | 19 | 1083 | 19 | 99  |
| EC17-2 | 218 | 294  | 72994   | 2.7  | 12.8649 | 0.6 | 2.0309  | 0.9 | 0.1896 | 0.8 | 0.81 | 1119 | 8  | 1126 | 6  | 1139 | 11 | 1139 | 11 | 98  |
| EC17-2 | 219 | 63   | 14692   | 6.6  | 14.0232 | 0.9 | 1.5975  | 1.4 | 0.1625 | 1.0 | 0.75 | 971  | 9  | 969  | 9  | 965  | 19 | 965  | 19 | 101 |
| EC17-2 | 220 | 973  | 586214  | 7.1  | 13.7805 | 0.5 | 1.7262  | 1.0 | 0.1726 | 0.8 | 0.87 | 1026 | 8  | 1018 | 6  | 1001 | 10 | 1001 | 10 | 103 |
| EC17-2 | 221 | 1035 | 1783502 | 16.2 | 12.9294 | 0.6 | 2.1220  | 1.3 | 0.1991 | 1.1 | 0.89 | 1170 | 12 | 1156 | 9  | 1129 | 12 | 1129 | 12 | 104 |
| EC17-2 | 222 | 201  | 259782  | 1.0  | 13.4604 | 0.7 | 1.9018  | 1.2 | 0.1857 | 0.9 | 0.77 | 1098 | 9  | 1082 | 8  | 1049 | 15 | 1049 | 15 | 105 |
| EC17-2 | 223 | 86   | 70096   | 4.0  | 13.8614 | 0.8 | 1.6987  | 1.2 | 0.1708 | 1.0 | 0.79 | 1017 | 9  | 1008 | 8  | 989  | 16 | 989  | 16 | 103 |
| EC17-2 | 224 | 212  | 101330  | 2.6  | 9.5481  | 0.5 | 4.4500  | 1.0 | 0.3083 | 0.9 | 0.85 | 1732 | 13 | 1722 | 9  | 1709 | 10 | 1709 | 10 | 101 |
| EC17-2 | 225 | 351  | 246469  | 2.2  | 13.4803 | 0.5 | 1.8490  | 1.3 | 0.1809 | 1.2 | 0.90 | 1072 | 11 | 1063 | 8  | 1046 | 11 | 1046 | 11 | 102 |
| EC17-2 | 226 | 265  | 101118  | 4.3  | 13.4436 | 0.5 | 1.7589  | 1.1 | 0.1716 | 0.9 | 0.86 | 1021 | 9  | 1030 | 7  | 1051 | 11 | 1051 | 11 | 97  |
| EC17-2 | 227 | 113  | 77914   | 1.5  | 13.6292 | 0.9 | 1.7599  | 1.3 | 0.1740 | 1.0 | 0.74 | 1034 | 9  | 1031 | 9  | 1023 | 18 | 1023 | 18 | 101 |
| EC17-2 | 228 | 114  | 261358  | 0.9  | 13.7205 | 0.6 | 1.7509  | 1.0 | 0.1743 | 0.9 | 0.82 | 1036 | 8  | 1028 | 7  | 1010 | 12 | 1010 | 12 | 103 |
| EC17-2 | 229 | 511  | 466569  | 2.7  | 12.7612 | 0.5 | 2.1428  | 1.3 | 0.1984 | 1.2 | 0.92 | 1167 | 13 | 1163 | 9  | 1155 | 10 | 1155 | 10 | 101 |
| EC17-2 | 230 | 575  | 201160  | 2.9  | 11.0793 | 0.6 | 3.0776  | 1.2 | 0.2474 | 1.0 | 0.87 | 1425 | 13 | 1427 | 9  | 1430 | 11 | 1430 | 11 | 100 |
| EC17-2 | 231 | 586  | 125159  | 1.8  | 13.7075 | 0.8 | 1.7477  | 1.7 | 0.1738 | 1.5 | 0.89 | 1033 | 14 | 1026 | 11 | 1012 | 16 | 1012 | 16 | 102 |
| EC17-2 | 232 | 156  | 188824  | 2.3  | 13.6559 | 0.8 | 1.7151  | 1.2 | 0.1699 | 0.9 | 0.76 | 1012 | 8  | 1014 | 8  | 1019 | 16 | 1019 | 16 | 99  |
| EC17-2 | 233 | 22   | 52053   | 1.3  | 12.7959 | 1.3 | 2.0727  | 1.6 | 0.1924 | 1.0 | 0.64 | 1135 | 11 | 1140 | 11 | 1150 | 25 | 1150 | 25 | 99  |
| EC17-2 | 234 | 384  | 134342  | 2.9  | 12.3463 | 0.6 | 2.4123  | 1.1 | 0.2161 | 0.9 | 0.85 | 1261 | 11 | 1246 | 8  | 1220 | 11 | 1220 | 11 | 103 |
| EC17-2 | 235 | 108  | 63198   | 2.1  | 13.1838 | 0.9 | 1.8848  | 1.4 | 0.1803 | 1.1 | 0.77 | 1069 | 11 | 1076 | 9  | 1090 | 18 | 1090 | 18 | 98  |
| EC17-2 | 237 | 371  | 1257152 | 5.2  | 12.7299 | 0.7 | 2.1180  | 1.3 | 0.1956 | 1.1 | 0.86 | 1152 | 12 | 1155 | 9  | 1160 | 13 | 1160 | 13 | 99  |
| EC17-2 | 238 | 95   | 54256   | 3.4  | 13.5610 | 0.8 | 1.7284  | 1.3 | 0.1701 | 1.1 | 0.81 | 1013 | 10 | 1019 | 8  | 1033 | 15 | 1033 | 15 | 98  |
| EC17-2 | 239 | 212  | 46764   | 3.8  | 13.6176 | 0.7 | 1.7892  | 1.0 | 0.1768 | 0.8 | 0.77 | 1049 | 8  | 1042 | 7  | 1025 | 14 | 1025 | 14 | 102 |
| EC17-2 | 240 | 163  | 375361  | 2.0  | 11.9572 | 0.7 | 2.5135  | 1.0 | 0.2181 | 0.7 | 0.72 | 1272 | 9  | 1276 | 8  | 1283 | 14 | 1283 | 14 | 99  |
| EC17-2 | 241 | 183  | 60974   | 4.8  | 13.7809 | 0.8 | 1.6774  | 1.1 | 0.1677 | 0.8 | 0.73 | 1000 | 7  | 1000 | 7  | 1001 | 15 | 1001 | 15 | 100 |
| EC17-2 | 242 | 395  | 329508  | 3.1  | 12.7488 | 0.7 | 2.1168  | 1.3 | 0.1958 | 1.1 | 0.83 | 1153 | 11 | 1154 | 9  | 1157 | 14 | 1157 | 14 | 100 |
| EC17-2 | 243 | 76   | 58970   | 2.7  | 11.2399 | 0.9 | 2.9995  | 1.8 | 0.2446 | 1.5 | 0.87 | 1411 | 19 | 1408 | 13 | 1403 | 17 | 1403 | 17 | 101 |
| EC17-2 | 244 | 1388 | 541665  | 2.9  | 13.4741 | 0.5 | 1.8730  | 1.1 | 0.1831 | 0.9 | 0.86 | 1084 | 9  | 1072 | 7  | 1046 | 11 | 1046 | 11 | 104 |
| EC17-2 | 245 | 1051 | 94780   | 2.2  | 13.6035 | 0.7 | 1.7709  | 1.5 | 0.1748 | 1.4 | 0.88 | 1038 | 13 | 1035 | 10 | 1027 | 15 | 1027 | 15 | 101 |
| EC17-2 | 246 | 76   | 68912   | 2.0  | 11.6578 | 0.7 | 2.6427  | 1.5 | 0.2235 | 1.3 | 0.89 | 1301 | 16 | 1313 | 11 | 1332 | 13 | 1332 | 13 | 98  |
| EC17-2 | 247 | 116  | 146365  | 2.5  | 12.8546 | 0.7 | 2.1825  | 1.3 | 0.2036 | 1.0 | 0.82 | 1194 | 11 | 1175 | 9  | 1141 | 15 | 1141 | 15 | 105 |
| EC17-2 | 248 | 304  | 2084595 | 2.1  | 12.7382 | 0.7 | 2.2303  | 1.2 | 0.2061 | 0.9 | 0.79 | 1208 | 10 | 1191 | 8  | 1159 | 15 | 1159 | 15 | 104 |
| EC17-2 | 249 | 96   | 25630   | 2.1  | 13.5034 | 0.8 | 1.7487  | 1.3 | 0.1713 | 1.0 | 0.80 | 1019 | 10 | 1027 | 8  | 1042 | 16 | 1042 | 16 | 98  |
| EC17-2 | 250 | 291  | 42200   | 3.2  | 12.3077 | 0.5 | 2.3991  | 1.0 | 0.2143 | 0.9 | 0.88 | 1251 | 10 | 1242 | 7  | 1227 | 10 | 1227 | 10 | 102 |
| EC17-2 | 251 | 88   | 77599   | 2.7  | 12.7169 | 0.9 | 2.1879  | 1.4 | 0.2019 | 1.1 | 0.78 | 1185 | 12 | 1177 | 10 | 1162 | 17 | 1162 | 17 | 102 |
| EC17-2 | 252 | 112  | 88120   | 2.1  | 10.8358 | 0.6 | 3.2039  | 1.1 | 0.2519 | 0.9 | 0.83 | 1448 | 12 | 1458 | 8  | 1472 | 12 | 1472 | 12 | 98  |
| EC17-2 | 253 | 150  | 39043   | 2.8  | 11.3960 | 0.8 | 2.6820  | 1.4 | 0.2218 | 1.1 | 0.81 | 1291 | 13 | 1324 | 10 | 1376 | 16 | 1376 | 16 | 94  |

|        |     |      |          |      |         |     |         |     |        |     |      |      |    |      |    |      |    |      |    |     |
|--------|-----|------|----------|------|---------|-----|---------|-----|--------|-----|------|------|----|------|----|------|----|------|----|-----|
| EC17-2 | 254 | 135  | 92811    | 3.7  | 12.8459 | 0.7 | 2.0470  | 1.2 | 0.1908 | 1.0 | 0.83 | 1126 | 10 | 1131 | 8  | 1142 | 13 | 1142 | 13 | 99  |
| EC17-2 | 255 | 51   | 98303    | 3.7  | 12.7163 | 1.0 | 2.1234  | 1.3 | 0.1959 | 0.7 | 0.59 | 1153 | 8  | 1156 | 9  | 1162 | 20 | 1162 | 20 | 99  |
| EC17-2 | 256 | 123  | 109463   | 2.4  | 12.1911 | 0.8 | 2.3434  | 1.3 | 0.2073 | 1.1 | 0.80 | 1214 | 12 | 1226 | 9  | 1245 | 15 | 1245 | 15 | 98  |
| EC17-2 | 257 | 231  | 434323   | 2.9  | 10.9452 | 0.6 | 3.3201  | 0.9 | 0.2637 | 0.7 | 0.79 | 1509 | 10 | 1486 | 7  | 1453 | 11 | 1453 | 11 | 104 |
| EC17-2 | 258 | 398  | 266346   | 0.9  | 12.9211 | 0.7 | 2.0351  | 1.2 | 0.1908 | 1.0 | 0.82 | 1126 | 10 | 1127 | 8  | 1130 | 14 | 1130 | 14 | 100 |
| EC17-2 | 260 | 156  | 70067    | 3.3  | 13.8122 | 0.8 | 1.6280  | 1.1 | 0.1632 | 0.8 | 0.71 | 974  | 7  | 981  | 7  | 996  | 16 | 996  | 16 | 98  |
| EC17-2 | 261 | 142  | 855753   | 3.3  | 12.1248 | 0.9 | 2.1715  | 1.4 | 0.1910 | 1.0 | 0.73 | 1127 | 10 | 1172 | 10 | 1256 | 18 | 1256 | 18 | 90  |
| EC17-2 | 262 | 69   | 83844    | 1.7  | 13.6153 | 0.9 | 1.7317  | 1.2 | 0.1711 | 0.8 | 0.67 | 1018 | 8  | 1020 | 8  | 1025 | 18 | 1025 | 18 | 99  |
| EC17-2 | 263 | 173  | 97034    | 4.3  | 12.3494 | 0.6 | 2.3528  | 1.0 | 0.2108 | 0.9 | 0.81 | 1233 | 10 | 1228 | 7  | 1220 | 12 | 1220 | 12 | 101 |
| EC17-2 | 264 | 81   | 12313    | 3.7  | 13.6539 | 0.7 | 1.8145  | 1.2 | 0.1798 | 0.9 | 0.77 | 1066 | 9  | 1051 | 8  | 1020 | 15 | 1020 | 15 | 105 |
| EC17-2 | 265 | 1142 | 25306131 | 3.0  | 12.9235 | 0.5 | 2.1398  | 1.0 | 0.2007 | 0.9 | 0.85 | 1179 | 9  | 1162 | 7  | 1130 | 10 | 1130 | 10 | 104 |
| EC17-2 | 266 | 195  | 70884    | 3.2  | 13.4408 | 0.6 | 1.8073  | 1.0 | 0.1763 | 0.8 | 0.80 | 1046 | 8  | 1048 | 7  | 1051 | 12 | 1051 | 12 | 100 |
| EC17-2 | 267 | 340  | 74134    | 4.0  | 13.8357 | 0.6 | 1.6881  | 1.2 | 0.1695 | 1.1 | 0.88 | 1009 | 10 | 1004 | 8  | 993  | 12 | 993  | 12 | 102 |
| EC17-2 | 268 | 147  | 97886    | 1.7  | 12.7954 | 0.7 | 2.1873  | 1.1 | 0.2031 | 0.9 | 0.76 | 1192 | 9  | 1177 | 8  | 1150 | 14 | 1150 | 14 | 104 |
| EC17-2 | 269 | 630  | 195615   | 5.0  | 12.3506 | 0.6 | 2.3306  | 1.1 | 0.2089 | 0.9 | 0.81 | 1223 | 10 | 1222 | 8  | 1220 | 12 | 1220 | 12 | 100 |
| EC17-2 | 270 | 95   | 31864    | 1.6  | 13.6666 | 0.9 | 1.7332  | 1.3 | 0.1719 | 1.0 | 0.75 | 1022 | 9  | 1021 | 8  | 1018 | 17 | 1018 | 17 | 100 |
| EC17-2 | 271 | 316  | 691922   | 3.9  | 10.7576 | 0.7 | 3.3340  | 1.3 | 0.2602 | 1.0 | 0.82 | 1491 | 14 | 1489 | 10 | 1486 | 13 | 1486 | 13 | 100 |
| EC17-2 | 272 | 147  | 34915    | 2.7  | 12.0824 | 0.7 | 2.4343  | 1.1 | 0.2134 | 0.9 | 0.79 | 1247 | 10 | 1253 | 8  | 1263 | 13 | 1263 | 13 | 99  |
| EC17-2 | 273 | 192  | 91367    | 38.1 | 13.2707 | 0.6 | 1.8762  | 1.4 | 0.1807 | 1.2 | 0.88 | 1071 | 12 | 1073 | 9  | 1077 | 13 | 1077 | 13 | 99  |
| EC17-2 | 274 | 58   | 65846    | 3.3  | 12.4668 | 1.0 | 2.2439  | 1.3 | 0.2030 | 0.8 | 0.61 | 1191 | 8  | 1195 | 9  | 1201 | 20 | 1201 | 20 | 99  |
| EC17-2 | 275 | 475  | 620910   | 3.0  | 13.2962 | 0.7 | 1.8549  | 1.3 | 0.1790 | 1.1 | 0.83 | 1061 | 11 | 1065 | 9  | 1073 | 15 | 1073 | 15 | 99  |
| EC17-2 | 276 | 97   | 63306    | 2.7  | 13.9708 | 0.8 | 1.5621  | 1.3 | 0.1583 | 1.0 | 0.76 | 948  | 9  | 955  | 8  | 973  | 17 | 973  | 17 | 97  |
| EC17-2 | 277 | 450  | 107669   | 3.6  | 13.1058 | 0.6 | 1.9041  | 1.6 | 0.1811 | 1.4 | 0.91 | 1073 | 14 | 1083 | 10 | 1102 | 13 | 1102 | 13 | 97  |
| EC17-2 | 278 | 78   | 116439   | 0.8  | 8.7339  | 0.6 | 5.2969  | 1.2 | 0.3357 | 1.0 | 0.85 | 1866 | 16 | 1868 | 10 | 1871 | 11 | 1871 | 11 | 100 |
| EC17-2 | 279 | 55   | 36273    | 3.1  | 14.5702 | 0.8 | 1.4674  | 1.3 | 0.1551 | 1.0 | 0.76 | 930  | 8  | 917  | 8  | 887  | 17 | 887  | 17 | 105 |
| EC17-2 | 280 | 80   | 55920    | 2.8  | 12.8029 | 0.8 | 2.1086  | 1.3 | 0.1959 | 1.0 | 0.81 | 1153 | 11 | 1152 | 9  | 1149 | 15 | 1149 | 15 | 100 |
| EC17-2 | 281 | 58   | 61998    | 3.6  | 13.4316 | 0.9 | 1.8228  | 1.1 | 0.1776 | 0.8 | 0.66 | 1054 | 7  | 1054 | 8  | 1053 | 17 | 1053 | 17 | 100 |
| EC17-2 | 282 | 254  | 865270   | 2.0  | 10.9880 | 0.6 | 3.1203  | 0.9 | 0.2488 | 0.7 | 0.73 | 1432 | 9  | 1438 | 7  | 1446 | 12 | 1446 | 12 | 99  |
| EC17-2 | 283 | 438  | 1108155  | 0.7  | 13.4887 | 0.6 | 1.8235  | 0.9 | 0.1785 | 0.7 | 0.78 | 1059 | 7  | 1054 | 6  | 1044 | 12 | 1044 | 12 | 101 |
| EC17-2 | 284 | 196  | 69069    | 1.3  | 13.5775 | 0.7 | 1.7941  | 1.4 | 0.1768 | 1.1 | 0.84 | 1049 | 11 | 1043 | 9  | 1031 | 15 | 1031 | 15 | 102 |
| EC17-2 | 285 | 137  | 195138   | 2.9  | 13.6551 | 0.9 | 1.7862  | 1.3 | 0.1770 | 0.9 | 0.73 | 1050 | 9  | 1040 | 8  | 1020 | 18 | 1020 | 18 | 103 |
| EC17-2 | 286 | 170  | 617967   | 4.4  | 14.4256 | 0.6 | 1.4693  | 1.0 | 0.1538 | 0.8 | 0.83 | 922  | 7  | 918  | 6  | 907  | 12 | 907  | 12 | 102 |
| EC17-2 | 287 | 44   | 23368    | 1.4  | 12.8851 | 0.9 | 1.9332  | 1.5 | 0.1807 | 1.2 | 0.80 | 1071 | 12 | 1093 | 10 | 1136 | 18 | 1136 | 18 | 94  |
| EC17-2 | 288 | 35   | 21209    | 2.9  | 11.4412 | 1.1 | 2.8140  | 1.4 | 0.2336 | 0.8 | 0.58 | 1353 | 10 | 1359 | 10 | 1369 | 22 | 1369 | 22 | 99  |
| EC17-2 | 289 | 23   | 12167    | 1.2  | 6.1394  | 0.6 | 10.5866 | 1.3 | 0.4716 | 1.1 | 0.87 | 2491 | 23 | 2488 | 12 | 2485 | 11 | 2485 | 11 | 100 |
| EC17-2 | 290 | 369  | 79460    | 3.2  | 13.8282 | 0.6 | 1.7124  | 1.3 | 0.1718 | 1.2 | 0.90 | 1022 | 11 | 1013 | 9  | 994  | 12 | 994  | 12 | 103 |
| EC17-2 | 291 | 227  | 60622    | 3.6  | 13.5967 | 0.7 | 1.7430  | 1.2 | 0.1720 | 1.0 | 0.83 | 1023 | 10 | 1025 | 8  | 1028 | 14 | 1028 | 14 | 99  |
| EC17-2 | 292 | 595  | 1737348  | 11.9 | 12.5011 | 0.5 | 2.3005  | 0.9 | 0.2087 | 0.8 | 0.85 | 1222 | 9  | 1212 | 7  | 1196 | 10 | 1196 | 10 | 102 |
| EC17-2 | 293 | 392  | 16468    | 2.5  | 11.4762 | 0.8 | 2.7720  | 1.2 | 0.2308 | 0.9 | 0.73 | 1339 | 11 | 1348 | 9  | 1363 | 16 | 1363 | 16 | 98  |
| EC17-2 | 294 | 307  | 333201   | 3.8  | 13.6506 | 0.7 | 1.7460  | 1.4 | 0.1729 | 1.2 | 0.85 | 1028 | 11 | 1026 | 9  | 1020 | 15 | 1020 | 15 | 101 |
| EC17-2 | 295 | 144  | 146216   | 1.4  | 5.5207  | 0.6 | 12.8328 | 1.1 | 0.5141 | 0.9 | 0.84 | 2674 | 20 | 2667 | 10 | 2663 | 10 | 2663 | 10 | 100 |
| EC17-2 | 296 | 260  | 135469   | 2.2  | 13.1938 | 0.6 | 1.8669  | 1.1 | 0.1787 | 0.9 | 0.81 | 1060 | 9  | 1069 | 7  | 1089 | 13 | 1089 | 13 | 97  |
| EC17-2 | 297 | 357  | 569816   | 14.2 | 13.3856 | 0.7 | 1.8925  | 1.3 | 0.1838 | 1.1 | 0.85 | 1088 | 11 | 1078 | 8  | 1060 | 14 | 1060 | 14 | 103 |
| EC17-2 | 299 | 132  | 102783   | 2.5  | 13.3585 | 0.8 | 1.9003  | 1.3 | 0.1842 | 1.1 | 0.81 | 1090 | 11 | 1081 | 9  | 1064 | 15 | 1064 | 15 | 102 |
| EC17-2 | 300 | 413  | 55984    | 4.3  | 12.8566 | 0.7 | 2.1577  | 1.2 | 0.2013 | 1.0 | 0.82 | 1182 | 11 | 1168 | 8  | 1140 | 14 | 1140 | 14 | 104 |
| EC17-2 | 301 | 214  | 399115   | 4.7  | 13.5650 | 0.6 | 1.7142  | 1.2 | 0.1687 | 1.0 | 0.86 | 1005 | 10 | 1014 | 8  | 1033 | 13 | 1033 | 13 | 97  |

|        |     |      |         |      |         |     |        |     |        |     |      |      |    |      |    |      |    |      |    |     |
|--------|-----|------|---------|------|---------|-----|--------|-----|--------|-----|------|------|----|------|----|------|----|------|----|-----|
| EC17-2 | 302 | 292  | 134295  | 1.8  | 13.3490 | 0.8 | 1.8882 | 1.6 | 0.1829 | 1.4 | 0.86 | 1083 | 14 | 1077 | 11 | 1065 | 16 | 1065 | 16 | 102 |
| EC17-2 | 303 | 334  | 529706  | 2.4  | 12.8386 | 0.7 | 2.1220 | 1.2 | 0.1977 | 1.0 | 0.80 | 1163 | 10 | 1156 | 8  | 1143 | 15 | 1143 | 15 | 102 |
| EC17-2 | 304 | 127  | 92922   | 3.3  | 14.3958 | 0.8 | 1.4740 | 1.3 | 0.1540 | 1.1 | 0.81 | 923  | 9  | 920  | 8  | 912  | 16 | 912  | 16 | 101 |
| EC17-2 | 305 | 1287 | 1322954 | 12.7 | 13.9604 | 0.7 | 1.6823 | 1.1 | 0.1704 | 0.9 | 0.80 | 1014 | 8  | 1002 | 7  | 975  | 13 | 975  | 13 | 104 |
| EC17-2 | 306 | 219  | 327822  | 2.0  | 13.3437 | 0.7 | 1.8429 | 1.3 | 0.1784 | 1.1 | 0.84 | 1058 | 11 | 1061 | 9  | 1066 | 14 | 1066 | 14 | 99  |
| EC17-2 | 307 | 273  | 242717  | 1.3  | 12.6332 | 0.9 | 2.1956 | 1.2 | 0.2013 | 0.8 | 0.68 | 1182 | 9  | 1180 | 8  | 1175 | 17 | 1175 | 17 | 101 |
| EC17-2 | 308 | 102  | 69565   | 2.3  | 13.4319 | 0.7 | 1.7563 | 1.1 | 0.1712 | 0.8 | 0.74 | 1019 | 8  | 1029 | 7  | 1053 | 15 | 1053 | 15 | 97  |
| EC17-2 | 309 | 263  | 381979  | 4.1  | 12.2557 | 0.6 | 2.3790 | 1.3 | 0.2115 | 1.1 | 0.86 | 1237 | 12 | 1236 | 9  | 1235 | 12 | 1235 | 12 | 100 |
| EC17-2 | 310 | 164  | 31488   | 1.4  | 12.3906 | 0.8 | 2.1332 | 1.4 | 0.1918 | 1.1 | 0.81 | 1131 | 12 | 1160 | 10 | 1213 | 16 | 1213 | 16 | 93  |
| EC17-2 | 311 | 46   | 40481   | 0.9  | 13.6966 | 1.1 | 1.6837 | 1.6 | 0.1673 | 1.2 | 0.75 | 997  | 11 | 1002 | 10 | 1013 | 22 | 1013 | 22 | 98  |
| EC17-2 | 312 | 73   | 51853   | 2.7  | 13.5878 | 0.9 | 1.7599 | 1.3 | 0.1735 | 1.0 | 0.75 | 1031 | 9  | 1031 | 8  | 1029 | 17 | 1029 | 17 | 100 |
| EC17-2 | 313 | 155  | 91114   | 3.3  | 14.4962 | 0.9 | 1.4742 | 1.3 | 0.1551 | 1.0 | 0.73 | 929  | 8  | 920  | 8  | 897  | 19 | 897  | 19 | 104 |
| EC17-2 | 314 | 454  | 97575   | 4.8  | 13.5433 | 0.5 | 1.8099 | 1.0 | 0.1779 | 0.9 | 0.84 | 1055 | 8  | 1049 | 7  | 1036 | 11 | 1036 | 11 | 102 |
| EC17-2 | 315 | 209  | 112198  | 1.1  | 7.3339  | 0.6 | 7.5764 | 1.2 | 0.4032 | 1.0 | 0.86 | 2184 | 18 | 2182 | 10 | 2181 | 10 | 2181 | 10 | 100 |

|        |    |     |         |     |         |     |        |     |        |     |      |      |    |      |    |      |    |      |    |     |
|--------|----|-----|---------|-----|---------|-----|--------|-----|--------|-----|------|------|----|------|----|------|----|------|----|-----|
| EC17-3 | 1  | 37  | 206226  | 2.2 | 11.2384 | 1.0 | 2.7835 | 1.4 | 0.2270 | 0.9 | 0.66 | 1319 | 11 | 1351 | 10 | 1403 | 19 | 1403 | 19 | 94  |
| EC17-3 | 2  | 138 | 66664   | 2.3 | 12.2891 | 0.6 | 2.3269 | 1.2 | 0.2075 | 1.0 | 0.84 | 1215 | 11 | 1221 | 8  | 1230 | 13 | 1230 | 13 | 99  |
| EC17-3 | 3  | 256 | 158639  | 2.0 | 12.5918 | 0.7 | 2.1593 | 1.2 | 0.1973 | 0.9 | 0.81 | 1161 | 10 | 1168 | 8  | 1182 | 13 | 1182 | 13 | 98  |
| EC17-3 | 4  | 136 | 114121  | 3.9 | 12.7006 | 0.8 | 2.1200 | 1.1 | 0.1954 | 0.7 | 0.69 | 1150 | 8  | 1155 | 7  | 1165 | 15 | 1165 | 15 | 99  |
| EC17-3 | 5  | 646 | 1023926 | 4.6 | 13.5269 | 0.5 | 1.7901 | 1.0 | 0.1757 | 0.8 | 0.84 | 1043 | 8  | 1042 | 7  | 1039 | 11 | 1039 | 11 | 100 |
| EC17-3 | 6  | 193 | 99933   | 1.7 | 12.3288 | 0.6 | 2.1262 | 1.2 | 0.1902 | 1.0 | 0.85 | 1122 | 10 | 1157 | 8  | 1223 | 12 | 1223 | 12 | 92  |
| EC17-3 | 7  | 56  | 43956   | 1.8 | 13.5222 | 0.9 | 1.7139 | 1.2 | 0.1682 | 0.8 | 0.66 | 1002 | 7  | 1014 | 8  | 1039 | 18 | 1039 | 18 | 96  |
| EC17-3 | 8  | 39  | 11456   | 4.4 | 12.8656 | 1.1 | 2.0051 | 1.5 | 0.1872 | 1.0 | 0.65 | 1106 | 10 | 1117 | 10 | 1139 | 23 | 1139 | 23 | 97  |
| EC17-3 | 9  | 88  | 253952  | 1.2 | 13.5610 | 0.8 | 1.6485 | 1.2 | 0.1622 | 0.8 | 0.70 | 969  | 8  | 989  | 8  | 1033 | 17 | 1033 | 17 | 94  |
| EC17-3 | 10 | 120 | 36060   | 1.3 | 12.6931 | 0.8 | 2.1113 | 1.1 | 0.1944 | 0.8 | 0.74 | 1145 | 9  | 1153 | 8  | 1166 | 15 | 1166 | 15 | 98  |
| EC17-3 | 11 | 181 | 103275  | 2.1 | 13.0170 | 0.7 | 1.9439 | 1.1 | 0.1836 | 0.9 | 0.76 | 1087 | 9  | 1096 | 8  | 1116 | 15 | 1116 | 15 | 97  |
| EC17-3 | 12 | 614 | 67211   | 1.9 | 11.6554 | 0.9 | 2.3588 | 1.2 | 0.1995 | 0.8 | 0.65 | 1173 | 8  | 1230 | 9  | 1333 | 18 | 1333 | 18 | 88  |
| EC17-3 | 13 | 108 | 54114   | 1.9 | 13.7746 | 0.8 | 1.7175 | 1.3 | 0.1717 | 1.0 | 0.78 | 1021 | 10 | 1015 | 8  | 1002 | 17 | 1002 | 17 | 102 |
| EC17-3 | 14 | 90  | 216483  | 3.4 | 11.8487 | 1.0 | 2.4374 | 1.5 | 0.2096 | 1.0 | 0.71 | 1226 | 12 | 1254 | 10 | 1301 | 20 | 1301 | 20 | 94  |
| EC17-3 | 15 | 96  | 35006   | 1.0 | 13.4544 | 0.8 | 1.7932 | 1.1 | 0.1751 | 0.8 | 0.73 | 1040 | 8  | 1043 | 7  | 1049 | 16 | 1049 | 16 | 99  |
| EC17-3 | 16 | 70  | 59752   | 1.4 | 13.4617 | 0.9 | 1.7968 | 1.3 | 0.1755 | 0.9 | 0.72 | 1042 | 9  | 1044 | 8  | 1048 | 18 | 1048 | 18 | 99  |
| EC17-3 | 17 | 169 | 39716   | 2.4 | 13.5896 | 0.7 | 1.7213 | 1.0 | 0.1697 | 0.7 | 0.72 | 1011 | 7  | 1017 | 7  | 1029 | 14 | 1029 | 14 | 98  |
| EC17-3 | 18 | 233 | 114281  | 1.4 | 13.3134 | 0.6 | 1.8733 | 1.1 | 0.1810 | 0.9 | 0.85 | 1072 | 9  | 1072 | 7  | 1071 | 12 | 1071 | 12 | 100 |
| EC17-3 | 19 | 67  | 47965   | 4.8 | 13.5469 | 0.7 | 1.7248 | 1.2 | 0.1695 | 1.0 | 0.80 | 1010 | 9  | 1018 | 8  | 1036 | 15 | 1036 | 15 | 97  |
| EC17-3 | 20 | 269 | 104447  | 3.0 | 12.8022 | 0.7 | 2.0857 | 1.1 | 0.1937 | 0.8 | 0.72 | 1142 | 8  | 1144 | 7  | 1149 | 15 | 1149 | 15 | 99  |
| EC17-3 | 22 | 103 | 33625   | 4.2 | 11.8507 | 0.8 | 2.2943 | 1.4 | 0.1973 | 1.1 | 0.81 | 1161 | 12 | 1211 | 10 | 1301 | 15 | 1301 | 15 | 89  |
| EC17-3 | 23 | 111 | 108428  | 2.5 | 13.4857 | 0.7 | 1.7495 | 1.2 | 0.1712 | 0.9 | 0.78 | 1019 | 9  | 1027 | 7  | 1045 | 14 | 1045 | 14 | 98  |
| EC17-3 | 25 | 78  | 710262  | 3.3 | 12.2983 | 0.7 | 2.2779 | 1.2 | 0.2033 | 0.9 | 0.79 | 1193 | 10 | 1205 | 8  | 1228 | 14 | 1228 | 14 | 97  |
| EC17-3 | 26 | 224 | 39436   | 1.8 | 13.7168 | 0.7 | 1.7077 | 1.4 | 0.1700 | 1.2 | 0.84 | 1012 | 11 | 1011 | 9  | 1010 | 15 | 1010 | 15 | 100 |
| EC17-3 | 28 | 18  | 14669   | 3.7 | 13.0879 | 1.3 | 1.6616 | 1.9 | 0.1578 | 1.4 | 0.71 | 944  | 12 | 994  | 12 | 1105 | 27 | 1105 | 27 | 85  |
| EC17-3 | 29 | 71  | 17109   | 2.2 | 13.6670 | 0.8 | 1.7454 | 1.3 | 0.1731 | 1.1 | 0.80 | 1029 | 10 | 1025 | 8  | 1018 | 16 | 1018 | 16 | 101 |
| EC17-3 | 30 | 141 | 1043260 | 2.1 | 12.0009 | 0.6 | 2.4471 | 1.0 | 0.2131 | 0.8 | 0.80 | 1245 | 9  | 1257 | 8  | 1276 | 12 | 1276 | 12 | 98  |
| EC17-3 | 31 | 130 | 141010  | 2.9 | 12.7643 | 0.6 | 2.1049 | 1.2 | 0.1949 | 1.0 | 0.85 | 1148 | 10 | 1150 | 8  | 1155 | 12 | 1155 | 12 | 99  |
| EC17-3 | 32 | 191 | 278470  | 3.5 | 12.6573 | 0.7 | 2.1727 | 1.2 | 0.1995 | 0.9 | 0.78 | 1173 | 10 | 1172 | 8  | 1171 | 15 | 1171 | 15 | 100 |
| EC17-3 | 33 | 405 | 93409   | 2.7 | 12.7597 | 0.6 | 2.0844 | 1.6 | 0.1930 | 1.4 | 0.92 | 1138 | 15 | 1144 | 11 | 1155 | 12 | 1155 | 12 | 98  |
| EC17-3 | 34 | 196 | 118864  | 3.2 | 13.9598 | 0.8 | 1.6226 | 1.2 | 0.1644 | 0.9 | 0.76 | 981  | 8  | 979  | 8  | 975  | 16 | 975  | 16 | 101 |

|        |    |      |         |     |         |     |        |     |        |     |      |      |    |      |    |      |    |      |    |     |
|--------|----|------|---------|-----|---------|-----|--------|-----|--------|-----|------|------|----|------|----|------|----|------|----|-----|
| EC17-3 | 35 | 125  | 85136   | 4.0 | 13.6338 | 0.7 | 1.7323 | 1.2 | 0.1714 | 1.0 | 0.82 | 1020 | 9  | 1021 | 8  | 1023 | 14 | 1023 | 14 | 100 |
| EC17-3 | 36 | 254  | 147172  | 4.5 | 12.2909 | 0.5 | 2.3676 | 1.1 | 0.2111 | 1.0 | 0.89 | 1235 | 11 | 1233 | 8  | 1229 | 9  | 1229 | 9  | 100 |
| EC17-3 | 37 | 128  | 106845  | 2.3 | 12.7503 | 0.8 | 2.1275 | 1.2 | 0.1968 | 0.9 | 0.74 | 1158 | 10 | 1158 | 8  | 1157 | 16 | 1157 | 16 | 100 |
| EC17-3 | 38 | 522  | 5876855 | 3.4 | 13.3747 | 0.6 | 1.8569 | 1.3 | 0.1802 | 1.2 | 0.90 | 1068 | 11 | 1066 | 8  | 1061 | 12 | 1061 | 12 | 101 |
| EC17-3 | 39 | 558  | 339978  | 3.3 | 13.5369 | 0.6 | 1.7381 | 1.3 | 0.1707 | 1.1 | 0.89 | 1016 | 11 | 1023 | 8  | 1037 | 12 | 1037 | 12 | 98  |
| EC17-3 | 40 | 53   | 61197   | 2.2 | 13.4405 | 1.3 | 1.7968 | 2.1 | 0.1752 | 1.6 | 0.79 | 1041 | 16 | 1044 | 13 | 1052 | 25 | 1052 | 25 | 99  |
| EC17-3 | 42 | 479  | 352803  | 2.8 | 11.7139 | 0.8 | 2.5934 | 1.2 | 0.2204 | 0.9 | 0.77 | 1284 | 11 | 1299 | 9  | 1323 | 15 | 1323 | 15 | 97  |
| EC17-3 | 43 | 51   | 256245  | 2.0 | 11.6591 | 0.7 | 2.7220 | 1.2 | 0.2303 | 1.0 | 0.82 | 1336 | 12 | 1334 | 9  | 1332 | 13 | 1332 | 13 | 100 |
| EC17-3 | 44 | 300  | 241960  | 6.5 | 12.6232 | 0.7 | 2.1961 | 1.3 | 0.2011 | 1.2 | 0.87 | 1181 | 13 | 1180 | 9  | 1177 | 13 | 1177 | 13 | 100 |
| EC17-3 | 45 | 227  | 110543  | 2.2 | 12.9558 | 0.6 | 1.9994 | 1.0 | 0.1880 | 0.8 | 0.81 | 1110 | 9  | 1115 | 7  | 1125 | 12 | 1125 | 12 | 99  |
| EC17-3 | 46 | 398  | 114177  | 1.6 | 12.9421 | 0.6 | 2.0959 | 1.2 | 0.1968 | 1.0 | 0.87 | 1158 | 11 | 1147 | 8  | 1127 | 12 | 1127 | 12 | 103 |
| EC17-3 | 47 | 202  | 74215   | 9.1 | 12.8277 | 0.8 | 2.1492 | 1.4 | 0.2000 | 1.2 | 0.82 | 1176 | 12 | 1165 | 10 | 1145 | 16 | 1145 | 16 | 103 |
| EC17-3 | 48 | 66   | 45618   | 1.9 | 14.2747 | 0.9 | 1.4798 | 1.3 | 0.1533 | 0.9 | 0.69 | 919  | 8  | 922  | 8  | 929  | 19 | 929  | 19 | 99  |
| EC17-3 | 49 | 23   | 28803   | 1.3 | 13.2478 | 1.3 | 1.7235 | 1.6 | 0.1657 | 1.0 | 0.60 | 988  | 9  | 1017 | 11 | 1081 | 26 | 1081 | 26 | 91  |
| EC17-3 | 50 | 859  | 1086722 | 5.5 | 12.8564 | 0.7 | 2.1019 | 1.4 | 0.1961 | 1.2 | 0.88 | 1154 | 13 | 1149 | 10 | 1140 | 13 | 1140 | 13 | 101 |
| EC17-3 | 51 | 89   | 77901   | 2.4 | 11.5931 | 0.7 | 2.6556 | 1.2 | 0.2234 | 0.9 | 0.81 | 1300 | 11 | 1316 | 9  | 1343 | 13 | 1343 | 13 | 97  |
| EC17-3 | 52 | 284  | 69634   | 1.9 | 12.7970 | 0.8 | 2.0302 | 1.6 | 0.1885 | 1.3 | 0.85 | 1113 | 14 | 1126 | 11 | 1150 | 16 | 1150 | 16 | 97  |
| EC17-3 | 53 | 67   | 25069   | 2.9 | 12.9172 | 1.1 | 1.9981 | 1.6 | 0.1873 | 1.2 | 0.74 | 1107 | 12 | 1115 | 11 | 1131 | 21 | 1131 | 21 | 98  |
| EC17-3 | 54 | 204  | 71493   | 2.7 | 12.2801 | 0.6 | 2.3195 | 1.2 | 0.2067 | 1.0 | 0.84 | 1211 | 11 | 1218 | 8  | 1231 | 12 | 1231 | 12 | 98  |
| EC17-3 | 55 | 103  | 93103   | 4.8 | 11.4233 | 0.8 | 2.9404 | 1.2 | 0.2437 | 0.9 | 0.77 | 1406 | 12 | 1392 | 9  | 1372 | 15 | 1372 | 15 | 103 |
| EC17-3 | 56 | 40   | 60476   | 1.8 | 13.1102 | 1.1 | 1.8448 | 1.7 | 0.1755 | 1.3 | 0.77 | 1042 | 12 | 1062 | 11 | 1101 | 21 | 1101 | 21 | 95  |
| EC17-3 | 57 | 690  | 252778  | 3.6 | 13.6982 | 0.7 | 1.7386 | 1.1 | 0.1728 | 0.9 | 0.79 | 1028 | 9  | 1023 | 7  | 1013 | 14 | 1013 | 14 | 101 |
| EC17-3 | 58 | 131  | 98066   | 2.3 | 13.4213 | 0.8 | 1.7618 | 1.2 | 0.1716 | 0.9 | 0.76 | 1021 | 8  | 1032 | 8  | 1054 | 15 | 1054 | 15 | 97  |
| EC17-3 | 59 | 171  | 71749   | 1.5 | 12.5714 | 0.8 | 2.1546 | 1.3 | 0.1965 | 1.0 | 0.80 | 1157 | 11 | 1167 | 9  | 1185 | 15 | 1185 | 15 | 98  |
| EC17-3 | 60 | 727  | 90736   | 3.8 | 13.0952 | 0.8 | 1.8767 | 1.4 | 0.1783 | 1.1 | 0.80 | 1058 | 11 | 1073 | 9  | 1104 | 16 | 1104 | 16 | 96  |
| EC17-3 | 61 | 383  | 183150  | 1.8 | 12.2867 | 0.6 | 2.3215 | 1.2 | 0.2070 | 1.1 | 0.87 | 1213 | 12 | 1219 | 9  | 1230 | 12 | 1230 | 12 | 99  |
| EC17-3 | 62 | 607  | 201112  | 5.2 | 12.6220 | 0.6 | 2.1730 | 1.2 | 0.1990 | 1.1 | 0.87 | 1170 | 11 | 1172 | 8  | 1177 | 12 | 1177 | 12 | 99  |
| EC17-3 | 63 | 59   | 27932   | 1.5 | 13.6936 | 0.9 | 1.7041 | 1.2 | 0.1693 | 0.8 | 0.66 | 1008 | 7  | 1010 | 8  | 1014 | 19 | 1014 | 19 | 99  |
| EC17-3 | 64 | 246  | 109844  | 3.2 | 14.3814 | 0.6 | 1.4202 | 1.2 | 0.1482 | 1.0 | 0.88 | 891  | 9  | 897  | 7  | 914  | 12 | 914  | 12 | 97  |
| EC17-3 | 65 | 136  | 137755  | 1.5 | 11.7468 | 0.6 | 2.6619 | 1.2 | 0.2269 | 1.0 | 0.86 | 1318 | 12 | 1318 | 9  | 1318 | 12 | 1318 | 12 | 100 |
| EC17-3 | 66 | 228  | 59926   | 1.6 | 13.5673 | 0.6 | 1.6751 | 1.1 | 0.1649 | 0.9 | 0.84 | 984  | 8  | 999  | 7  | 1033 | 12 | 1033 | 12 | 95  |
| EC17-3 | 67 | 122  | 78245   | 2.1 | 12.3318 | 0.5 | 2.2811 | 1.3 | 0.2041 | 1.1 | 0.91 | 1197 | 12 | 1206 | 9  | 1223 | 10 | 1223 | 10 | 98  |
| EC17-3 | 68 | 96   | 108240  | 1.8 | 13.5852 | 0.8 | 1.6858 | 1.4 | 0.1662 | 1.2 | 0.83 | 991  | 11 | 1003 | 9  | 1030 | 16 | 1030 | 16 | 96  |
| EC17-3 | 69 | 383  | 152759  | 1.6 | 13.3799 | 0.5 | 1.8177 | 1.1 | 0.1765 | 1.0 | 0.89 | 1048 | 9  | 1052 | 7  | 1061 | 10 | 1061 | 10 | 99  |
| EC17-3 | 70 | 156  | 42558   | 2.8 | 13.3938 | 0.8 | 1.8490 | 1.2 | 0.1797 | 0.9 | 0.76 | 1065 | 9  | 1063 | 8  | 1059 | 15 | 1059 | 15 | 101 |
| EC17-3 | 71 | 126  | 104054  | 1.6 | 12.5189 | 0.7 | 2.3072 | 1.2 | 0.2096 | 1.0 | 0.83 | 1227 | 11 | 1215 | 9  | 1193 | 13 | 1193 | 13 | 103 |
| EC17-3 | 72 | 59   | 68873   | 2.2 | 13.6011 | 0.9 | 1.7481 | 1.5 | 0.1725 | 1.3 | 0.82 | 1026 | 12 | 1026 | 10 | 1028 | 18 | 1028 | 18 | 100 |
| EC17-3 | 73 | 1051 | 5217212 | 3.6 | 13.6303 | 0.6 | 1.7975 | 1.1 | 0.1778 | 0.9 | 0.85 | 1055 | 9  | 1045 | 7  | 1023 | 12 | 1023 | 12 | 103 |
| EC17-3 | 74 | 96   | 93474   | 2.1 | 12.6884 | 0.7 | 2.0785 | 1.2 | 0.1914 | 1.0 | 0.80 | 1129 | 10 | 1142 | 8  | 1167 | 15 | 1167 | 15 | 97  |
| EC17-3 | 75 | 177  | 81391   | 2.8 | 10.9656 | 0.5 | 3.2992 | 1.1 | 0.2625 | 0.9 | 0.86 | 1503 | 12 | 1481 | 8  | 1450 | 10 | 1450 | 10 | 104 |
| EC17-3 | 76 | 235  | 932997  | 1.5 | 13.8400 | 0.6 | 1.6114 | 1.2 | 0.1618 | 1.0 | 0.86 | 967  | 9  | 975  | 7  | 992  | 12 | 992  | 12 | 97  |
| EC17-3 | 77 | 261  | 122633  | 2.3 | 12.2374 | 0.6 | 2.4020 | 1.2 | 0.2133 | 1.1 | 0.88 | 1246 | 12 | 1243 | 9  | 1238 | 11 | 1238 | 11 | 101 |
| EC17-3 | 78 | 678  | 103440  | 5.4 | 12.8577 | 0.6 | 1.9612 | 1.1 | 0.1830 | 0.9 | 0.85 | 1083 | 9  | 1102 | 7  | 1140 | 12 | 1140 | 12 | 95  |
| EC17-3 | 79 | 50   | 26555   | 2.1 | 11.6365 | 0.8 | 2.6482 | 1.2 | 0.2236 | 0.9 | 0.74 | 1301 | 11 | 1314 | 9  | 1336 | 16 | 1336 | 16 | 97  |
| EC17-3 | 80 | 142  | 184313  | 1.8 | 13.3015 | 0.7 | 1.8672 | 1.2 | 0.1802 | 1.0 | 0.81 | 1068 | 10 | 1070 | 8  | 1072 | 15 | 1072 | 15 | 100 |
| EC17-3 | 81 | 175  | 86224   | 2.4 | 13.5374 | 0.7 | 1.7130 | 1.1 | 0.1683 | 0.8 | 0.77 | 1002 | 8  | 1013 | 7  | 1037 | 14 | 1037 | 14 | 97  |

|        |     |      |         |     |         |     |         |     |        |     |      |      |    |      |    |      |    |      |    |     |
|--------|-----|------|---------|-----|---------|-----|---------|-----|--------|-----|------|------|----|------|----|------|----|------|----|-----|
| EC17-3 | 82  | 303  | 100140  | 4.5 | 12.5434 | 0.7 | 2.1242  | 1.2 | 0.1933 | 1.0 | 0.83 | 1139 | 10 | 1157 | 8  | 1189 | 13 | 1189 | 13 | 96  |
| EC17-3 | 83  | 172  | 84031   | 3.1 | 13.5472 | 0.8 | 1.7644  | 1.1 | 0.1734 | 0.8 | 0.73 | 1031 | 8  | 1032 | 7  | 1036 | 16 | 1036 | 16 | 100 |
| EC17-3 | 84  | 155  | 99876   | 1.7 | 12.8318 | 0.7 | 2.0119  | 1.2 | 0.1873 | 1.0 | 0.82 | 1107 | 10 | 1120 | 8  | 1144 | 13 | 1144 | 13 | 97  |
| EC17-3 | 85  | 137  | 82836   | 2.1 | 12.7161 | 0.7 | 2.1406  | 1.1 | 0.1975 | 0.9 | 0.78 | 1162 | 10 | 1162 | 8  | 1162 | 14 | 1162 | 14 | 100 |
| EC17-3 | 86  | 658  | 389937  | 1.8 | 13.3457 | 0.5 | 1.8070  | 1.3 | 0.1750 | 1.2 | 0.93 | 1039 | 11 | 1048 | 8  | 1066 | 10 | 1066 | 10 | 98  |
| EC17-3 | 87  | 270  | 1011121 | 2.9 | 12.5391 | 0.7 | 2.1806  | 1.1 | 0.1984 | 0.9 | 0.80 | 1167 | 10 | 1175 | 8  | 1190 | 13 | 1190 | 13 | 98  |
| EC17-3 | 88  | 373  | 116095  | 2.3 | 13.3173 | 0.5 | 1.8743  | 1.0 | 0.1811 | 0.8 | 0.83 | 1073 | 8  | 1072 | 6  | 1070 | 11 | 1070 | 11 | 100 |
| EC17-3 | 89  | 177  | 27446   | 2.5 | 12.6240 | 1.8 | 1.9101  | 2.0 | 0.1750 | 0.9 | 0.45 | 1039 | 9  | 1085 | 13 | 1177 | 36 | 1177 | 36 | 88  |
| EC17-3 | 90  | 825  | 62176   | 3.5 | 11.0649 | 0.5 | 2.8669  | 1.2 | 0.2302 | 1.0 | 0.88 | 1335 | 12 | 1373 | 9  | 1433 | 10 | 1433 | 10 | 93  |
| EC17-3 | 91  | 1086 | 392713  | 2.9 | 13.5748 | 0.6 | 1.7681  | 1.0 | 0.1742 | 0.8 | 0.79 | 1035 | 8  | 1034 | 7  | 1031 | 13 | 1031 | 13 | 100 |
| EC17-3 | 92  | 68   | 27343   | 1.3 | 13.3220 | 0.9 | 1.8743  | 1.2 | 0.1812 | 0.9 | 0.69 | 1073 | 8  | 1072 | 8  | 1069 | 18 | 1069 | 18 | 100 |
| EC17-3 | 93  | 1108 | 505202  | 3.0 | 13.5605 | 0.8 | 1.8099  | 1.3 | 0.1781 | 1.1 | 0.81 | 1056 | 11 | 1049 | 9  | 1034 | 16 | 1034 | 16 | 102 |
| EC17-3 | 94  | 720  | 145567  | 1.8 | 11.2752 | 0.7 | 2.6965  | 1.7 | 0.2206 | 1.6 | 0.92 | 1285 | 18 | 1328 | 13 | 1397 | 13 | 1397 | 13 | 92  |
| EC17-3 | 95  | 112  | 77796   | 2.8 | 12.1331 | 0.6 | 2.2895  | 1.0 | 0.2016 | 0.8 | 0.79 | 1184 | 9  | 1209 | 7  | 1255 | 12 | 1255 | 12 | 94  |
| EC17-3 | 96  | 166  | 187004  | 2.8 | 13.5303 | 0.7 | 1.7416  | 1.2 | 0.1710 | 1.0 | 0.80 | 1018 | 9  | 1024 | 8  | 1038 | 14 | 1038 | 14 | 98  |
| EC17-3 | 97  | 96   | 117206  | 2.0 | 11.4668 | 0.8 | 2.8170  | 1.3 | 0.2344 | 1.0 | 0.80 | 1357 | 13 | 1360 | 10 | 1364 | 15 | 1364 | 15 | 99  |
| EC17-3 | 98  | 194  | 97611   | 2.4 | 13.1744 | 0.9 | 1.8620  | 1.3 | 0.1780 | 1.0 | 0.75 | 1056 | 10 | 1068 | 9  | 1092 | 18 | 1092 | 18 | 97  |
| EC17-3 | 99  | 187  | 233702  | 1.7 | 5.3722  | 0.6 | 11.6391 | 1.2 | 0.4537 | 1.1 | 0.88 | 2412 | 22 | 2576 | 11 | 2708 | 10 | 2708 | 10 | 89  |
| EC17-3 | 100 | 288  | 750237  | 4.0 | 12.8757 | 0.7 | 2.0063  | 1.2 | 0.1874 | 0.9 | 0.77 | 1107 | 9  | 1118 | 8  | 1137 | 15 | 1137 | 15 | 97  |
| EC17-3 | 101 | 365  | 222742  | 1.8 | 9.6818  | 0.6 | 4.2618  | 1.2 | 0.2994 | 1.0 | 0.85 | 1688 | 15 | 1686 | 10 | 1683 | 12 | 1683 | 12 | 100 |
| EC17-3 | 102 | 324  | 92396   | 2.2 | 12.6002 | 0.7 | 2.1152  | 1.2 | 0.1934 | 1.0 | 0.84 | 1140 | 11 | 1154 | 8  | 1180 | 13 | 1180 | 13 | 97  |
| EC17-3 | 103 | 25   | 17226   | 1.4 | 12.2462 | 1.6 | 2.3846  | 2.1 | 0.2119 | 1.4 | 0.68 | 1239 | 16 | 1238 | 15 | 1236 | 30 | 1236 | 30 | 100 |
| EC17-3 | 104 | 440  | 101171  | 4.9 | 12.7871 | 0.7 | 1.9948  | 1.3 | 0.1851 | 1.0 | 0.81 | 1095 | 10 | 1114 | 8  | 1151 | 14 | 1151 | 14 | 95  |
| EC17-3 | 105 | 551  | 227333  | 3.5 | 13.1695 | 0.6 | 1.8496  | 1.1 | 0.1767 | 1.0 | 0.84 | 1049 | 9  | 1063 | 8  | 1092 | 12 | 1092 | 12 | 96  |
| EC17-3 | 106 | 37   | 11038   | 2.2 | 13.6851 | 1.4 | 1.6825  | 1.6 | 0.1671 | 0.9 | 0.57 | 996  | 9  | 1002 | 10 | 1015 | 27 | 1015 | 27 | 98  |
| EC17-3 | 107 | 60   | 39781   | 1.4 | 12.9741 | 2.0 | 1.8323  | 2.1 | 0.1725 | 0.9 | 0.41 | 1026 | 8  | 1057 | 14 | 1122 | 39 | 1122 | 39 | 91  |
| EC17-3 | 108 | 275  | 94680   | 3.3 | 13.0141 | 0.8 | 1.9469  | 1.3 | 0.1838 | 1.1 | 0.81 | 1088 | 11 | 1097 | 9  | 1116 | 15 | 1116 | 15 | 97  |
| EC17-3 | 109 | 56   | 22866   | 2.8 | 13.0773 | 1.1 | 1.8908  | 1.3 | 0.1794 | 0.8 | 0.57 | 1064 | 7  | 1078 | 9  | 1106 | 22 | 1106 | 22 | 96  |
| EC17-3 | 110 | 43   | 41962   | 1.6 | 13.1315 | 2.5 | 1.6626  | 2.7 | 0.1584 | 1.1 | 0.41 | 948  | 10 | 994  | 17 | 1098 | 49 | 1098 | 49 | 86  |
| EC17-3 | 111 | 113  | 47797   | 2.2 | 13.4320 | 0.7 | 1.7640  | 1.2 | 0.1719 | 1.0 | 0.84 | 1023 | 10 | 1032 | 8  | 1053 | 13 | 1053 | 13 | 97  |
| EC17-3 | 112 | 437  | 846077  | 3.1 | 13.3143 | 0.6 | 1.8727  | 1.1 | 0.1809 | 1.0 | 0.88 | 1072 | 10 | 1071 | 8  | 1071 | 11 | 1071 | 11 | 100 |
| EC17-3 | 113 | 34   | 24565   | 2.0 | 13.4924 | 1.0 | 1.7761  | 1.5 | 0.1739 | 1.1 | 0.73 | 1033 | 10 | 1037 | 10 | 1044 | 20 | 1044 | 20 | 99  |
| EC17-3 | 114 | 237  | 104248  | 3.4 | 12.6615 | 0.7 | 2.2072  | 1.1 | 0.2028 | 0.9 | 0.76 | 1190 | 9  | 1183 | 8  | 1171 | 15 | 1171 | 15 | 102 |
| EC17-3 | 115 | 836  | 52344   | 2.5 | 12.0956 | 1.2 | 2.1984  | 1.6 | 0.1929 | 1.1 | 0.67 | 1137 | 11 | 1181 | 11 | 1261 | 23 | 1261 | 23 | 90  |
| EC17-3 | 116 | 163  | 129728  | 3.0 | 12.6119 | 0.8 | 2.1752  | 1.2 | 0.1991 | 0.9 | 0.75 | 1170 | 10 | 1173 | 8  | 1179 | 16 | 1179 | 16 | 99  |
| EC17-3 | 117 | 104  | 92983   | 2.5 | 13.1190 | 0.7 | 1.9303  | 1.1 | 0.1837 | 0.9 | 0.77 | 1087 | 9  | 1092 | 8  | 1100 | 15 | 1100 | 15 | 99  |
| EC17-3 | 118 | 196  | 120997  | 1.5 | 11.3144 | 0.7 | 2.9094  | 1.0 | 0.2388 | 0.8 | 0.74 | 1381 | 9  | 1384 | 8  | 1390 | 13 | 1390 | 13 | 99  |
| EC17-3 | 119 | 256  | 121115  | 1.5 | 12.6119 | 0.8 | 2.2758  | 1.6 | 0.2083 | 1.3 | 0.85 | 1220 | 15 | 1205 | 11 | 1179 | 16 | 1179 | 16 | 103 |
| EC17-3 | 120 | 125  | 20808   | 1.8 | 12.4773 | 2.0 | 1.8625  | 2.3 | 0.1686 | 1.0 | 0.44 | 1005 | 9  | 1068 | 15 | 1200 | 40 | 1200 | 40 | 84  |
| EC17-3 | 121 | 240  | 106706  | 3.3 | 12.6652 | 0.6 | 2.2420  | 1.1 | 0.2060 | 0.9 | 0.82 | 1208 | 10 | 1194 | 8  | 1170 | 12 | 1170 | 12 | 103 |
| EC17-3 | 122 | 121  | 31849   | 1.3 | 13.4096 | 1.0 | 1.8565  | 1.3 | 0.1806 | 0.9 | 0.67 | 1070 | 9  | 1066 | 8  | 1056 | 19 | 1056 | 19 | 101 |
| EC17-3 | 123 | 359  | 88559   | 2.1 | 12.8227 | 0.6 | 2.0879  | 1.1 | 0.1943 | 0.9 | 0.83 | 1144 | 10 | 1145 | 8  | 1146 | 12 | 1146 | 12 | 100 |
| EC17-3 | 125 | 85   | 105677  | 0.6 | 5.4478  | 0.5 | 13.2948 | 1.0 | 0.5255 | 0.9 | 0.87 | 2723 | 20 | 2701 | 10 | 2685 | 8  | 2685 | 8  | 101 |
| EC17-3 | 126 | 42   | 15877   | 2.4 | 9.8327  | 1.0 | 4.0129  | 1.3 | 0.2863 | 0.9 | 0.70 | 1623 | 13 | 1637 | 11 | 1655 | 18 | 1655 | 18 | 98  |
| EC17-3 | 127 | 326  | 17951   | 4.0 | 12.5275 | 1.0 | 1.9241  | 1.4 | 0.1749 | 1.0 | 0.69 | 1039 | 9  | 1089 | 9  | 1192 | 20 | 1192 | 20 | 87  |
| EC17-3 | 128 | 312  | 108266  | 2.3 | 13.6023 | 0.6 | 1.7555  | 1.3 | 0.1733 | 1.2 | 0.91 | 1030 | 11 | 1029 | 9  | 1027 | 11 | 1027 | 11 | 100 |



|        |     |      |         |      |         |     |        |     |        |     |      |      |    |      |    |      |    |      |    |     |
|--------|-----|------|---------|------|---------|-----|--------|-----|--------|-----|------|------|----|------|----|------|----|------|----|-----|
| EC17-3 | 129 | 106  | 672954  | 1.1  | 12.8508 | 0.8 | 2.0719 | 1.3 | 0.1932 | 1.0 | 0.78 | 1139 | 11 | 1140 | 9  | 1141 | 17 | 1141 | 17 | 100 |
| EC17-3 | 130 | 79   | 29190   | 2.6  | 13.0917 | 0.9 | 1.9974 | 1.2 | 0.1897 | 0.9 | 0.71 | 1120 | 9  | 1115 | 8  | 1104 | 17 | 1104 | 17 | 101 |
| EC17-3 | 131 | 259  | 86548   | 2.4  | 12.7076 | 0.7 | 2.1456 | 1.2 | 0.1978 | 1.0 | 0.83 | 1164 | 11 | 1164 | 8  | 1164 | 13 | 1164 | 13 | 100 |
| EC17-3 | 132 | 409  | 169378  | 12.5 | 13.8020 | 0.7 | 1.7040 | 1.1 | 0.1706 | 0.9 | 0.81 | 1016 | 8  | 1010 | 7  | 998  | 13 | 998  | 13 | 102 |
| EC17-3 | 133 | 379  | 402660  | 2.5  | 12.7268 | 0.6 | 2.1172 | 1.4 | 0.1955 | 1.3 | 0.91 | 1151 | 14 | 1154 | 10 | 1161 | 12 | 1161 | 12 | 99  |
| EC17-3 | 134 | 353  | 161603  | 3.5  | 12.7226 | 0.7 | 2.1781 | 1.1 | 0.2011 | 0.9 | 0.80 | 1181 | 10 | 1174 | 8  | 1161 | 13 | 1161 | 13 | 102 |
| EC17-3 | 135 | 230  | 228283  | 4.6  | 12.8161 | 0.6 | 2.1225 | 1.1 | 0.1974 | 1.0 | 0.84 | 1161 | 10 | 1156 | 8  | 1147 | 13 | 1147 | 13 | 101 |
| EC17-3 | 136 | 85   | 589118  | 2.5  | 10.9552 | 0.7 | 3.1475 | 1.3 | 0.2502 | 1.0 | 0.82 | 1439 | 13 | 1444 | 10 | 1452 | 14 | 1452 | 14 | 99  |
| EC17-3 | 137 | 350  | 103992  | 3.3  | 13.4801 | 0.8 | 1.7696 | 1.4 | 0.1731 | 1.1 | 0.83 | 1029 | 11 | 1034 | 9  | 1046 | 15 | 1046 | 15 | 98  |
| EC17-3 | 138 | 35   | 26848   | 1.2  | 13.3498 | 1.0 | 1.8910 | 1.4 | 0.1832 | 1.0 | 0.71 | 1084 | 10 | 1078 | 10 | 1065 | 21 | 1065 | 21 | 102 |
| EC17-3 | 139 | 222  | 68562   | 3.7  | 13.4838 | 0.7 | 1.7508 | 1.2 | 0.1713 | 1.0 | 0.84 | 1019 | 9  | 1027 | 8  | 1045 | 13 | 1045 | 13 | 98  |
| EC17-3 | 140 | 295  | 104449  | 2.0  | 12.0249 | 0.5 | 2.5357 | 1.1 | 0.2212 | 0.9 | 0.87 | 1288 | 11 | 1282 | 8  | 1272 | 10 | 1272 | 10 | 101 |
| EC17-3 | 141 | 133  | 108435  | 1.3  | 10.6668 | 1.1 | 3.3404 | 1.4 | 0.2585 | 1.0 | 0.67 | 1482 | 13 | 1491 | 11 | 1502 | 20 | 1502 | 20 | 99  |
| EC17-3 | 142 | 569  | 1272694 | 1.9  | 12.7555 | 0.5 | 2.1525 | 1.0 | 0.1992 | 0.9 | 0.87 | 1171 | 10 | 1166 | 7  | 1156 | 10 | 1156 | 10 | 101 |
| EC17-3 | 143 | 176  | 41786   | 2.6  | 12.3270 | 2.4 | 2.0907 | 2.6 | 0.1870 | 1.1 | 0.41 | 1105 | 11 | 1146 | 18 | 1224 | 47 | 1224 | 47 | 90  |
| EC17-3 | 144 | 269  | 102042  | 3.6  | 12.8447 | 0.6 | 2.1084 | 1.1 | 0.1965 | 0.9 | 0.80 | 1156 | 9  | 1152 | 7  | 1142 | 13 | 1142 | 13 | 101 |
| EC17-3 | 145 | 66   | 38333   | 2.0  | 12.6107 | 0.9 | 2.1787 | 1.6 | 0.1994 | 1.4 | 0.83 | 1172 | 15 | 1174 | 11 | 1179 | 18 | 1179 | 18 | 99  |
| EC17-3 | 146 | 127  | 218917  | 2.8  | 13.4708 | 0.6 | 1.7458 | 1.1 | 0.1706 | 0.9 | 0.85 | 1016 | 9  | 1026 | 7  | 1047 | 12 | 1047 | 12 | 97  |
| EC17-3 | 147 | 351  | 293087  | 5.5  | 13.5887 | 0.6 | 1.7376 | 1.1 | 0.1713 | 0.9 | 0.82 | 1019 | 8  | 1023 | 7  | 1029 | 12 | 1029 | 12 | 99  |
| EC17-3 | 148 | 725  | 150613  | 7.0  | 13.5903 | 0.7 | 1.8012 | 1.3 | 0.1776 | 1.0 | 0.84 | 1054 | 10 | 1046 | 8  | 1029 | 14 | 1029 | 14 | 102 |
| EC17-3 | 149 | 247  | 426227  | 1.8  | 13.2758 | 0.6 | 1.9116 | 1.4 | 0.1841 | 1.3 | 0.92 | 1090 | 13 | 1085 | 9  | 1076 | 11 | 1076 | 11 | 101 |
| EC17-3 | 150 | 388  | 160490  | 4.0  | 12.8189 | 0.5 | 2.1379 | 1.4 | 0.1989 | 1.3 | 0.92 | 1169 | 14 | 1161 | 10 | 1146 | 10 | 1146 | 10 | 102 |
| EC17-3 | 151 | 64   | 27683   | 2.2  | 11.7338 | 0.9 | 2.6805 | 1.2 | 0.2282 | 0.8 | 0.67 | 1325 | 10 | 1323 | 9  | 1320 | 17 | 1320 | 17 | 100 |
| EC17-3 | 152 | 89   | 23855   | 2.6  | 13.8376 | 0.8 | 1.5963 | 1.4 | 0.1603 | 1.1 | 0.80 | 958  | 10 | 969  | 9  | 993  | 17 | 993  | 17 | 97  |
| EC17-3 | 153 | 85   | 85571   | 1.1  | 14.0115 | 1.0 | 1.5871 | 1.4 | 0.1613 | 0.9 | 0.67 | 964  | 8  | 965  | 9  | 967  | 21 | 967  | 21 | 100 |
| EC17-3 | 155 | 97   | 38090   | 2.5  | 13.3787 | 0.8 | 1.8259 | 1.3 | 0.1772 | 1.1 | 0.81 | 1052 | 10 | 1055 | 9  | 1061 | 16 | 1061 | 16 | 99  |
| EC17-3 | 157 | 248  | 8429071 | 5.0  | 13.6292 | 0.7 | 1.7810 | 1.1 | 0.1761 | 0.9 | 0.80 | 1046 | 9  | 1039 | 7  | 1023 | 14 | 1023 | 14 | 102 |
| EC17-3 | 158 | 757  | 345904  | 3.3  | 9.8636  | 0.7 | 4.0639 | 1.1 | 0.2909 | 0.9 | 0.79 | 1646 | 13 | 1647 | 9  | 1649 | 12 | 1649 | 12 | 100 |
| EC17-3 | 159 | 201  | 215895  | 2.6  | 13.4587 | 0.8 | 1.8383 | 1.3 | 0.1795 | 1.0 | 0.81 | 1064 | 10 | 1059 | 8  | 1049 | 15 | 1049 | 15 | 101 |
| EC17-3 | 160 | 150  | 123399  | 3.6  | 13.6334 | 0.6 | 1.7785 | 1.2 | 0.1759 | 1.0 | 0.84 | 1045 | 9  | 1038 | 8  | 1023 | 13 | 1023 | 13 | 102 |
| EC17-3 | 161 | 244  | 350277  | 3.4  | 12.7583 | 0.7 | 2.1333 | 1.4 | 0.1975 | 1.2 | 0.84 | 1162 | 12 | 1160 | 9  | 1156 | 15 | 1156 | 15 | 101 |
| EC17-3 | 162 | 61   | 609317  | 2.8  | 11.9324 | 0.8 | 2.5357 | 1.5 | 0.2195 | 1.2 | 0.83 | 1279 | 14 | 1282 | 11 | 1287 | 16 | 1287 | 16 | 99  |
| EC17-3 | 163 | 200  | 27944   | 5.1  | 12.7593 | 0.7 | 2.1254 | 1.0 | 0.1968 | 0.8 | 0.75 | 1158 | 8  | 1157 | 7  | 1155 | 14 | 1155 | 14 | 100 |
| EC17-3 | 164 | 1015 | 284855  | 2.5  | 12.7178 | 0.5 | 2.0322 | 1.1 | 0.1875 | 0.9 | 0.87 | 1108 | 10 | 1126 | 7  | 1162 | 11 | 1162 | 11 | 95  |
| EC17-3 | 165 | 172  | 101738  | 1.4  | 12.3778 | 1.4 | 2.3156 | 1.7 | 0.2080 | 0.9 | 0.57 | 1218 | 10 | 1217 | 12 | 1215 | 27 | 1215 | 27 | 100 |
| EC17-3 | 166 | 44   | 9320    | 3.8  | 13.4588 | 1.1 | 1.7848 | 1.5 | 0.1743 | 1.0 | 0.66 | 1036 | 10 | 1040 | 10 | 1049 | 23 | 1049 | 23 | 99  |
| EC17-3 | 167 | 57   | 33228   | 1.0  | 13.9218 | 1.0 | 1.6950 | 1.4 | 0.1712 | 1.0 | 0.68 | 1019 | 9  | 1007 | 9  | 980  | 21 | 980  | 21 | 104 |
| EC17-3 | 168 | 190  | 115910  | 4.1  | 13.2542 | 0.9 | 1.7713 | 1.3 | 0.1703 | 0.9 | 0.68 | 1014 | 8  | 1035 | 8  | 1080 | 19 | 1080 | 19 | 94  |
| EC17-3 | 169 | 98   | 124203  | 2.2  | 12.5945 | 0.8 | 2.1950 | 1.7 | 0.2006 | 1.5 | 0.89 | 1178 | 16 | 1179 | 12 | 1181 | 15 | 1181 | 15 | 100 |
| EC17-3 | 170 | 231  | 96650   | 1.7  | 10.7762 | 0.6 | 3.2447 | 1.2 | 0.2537 | 1.1 | 0.87 | 1458 | 14 | 1468 | 9  | 1483 | 11 | 1483 | 11 | 98  |
| EC17-3 | 171 | 805  | 99947   | 1.0  | 13.3969 | 0.6 | 1.8569 | 1.3 | 0.1805 | 1.1 | 0.89 | 1070 | 11 | 1066 | 8  | 1058 | 12 | 1058 | 12 | 101 |
| EC17-3 | 172 | 138  | 55504   | 1.9  | 12.8937 | 0.7 | 2.0056 | 1.2 | 0.1876 | 0.9 | 0.76 | 1109 | 9  | 1117 | 8  | 1135 | 15 | 1135 | 15 | 98  |
| EC17-3 | 173 | 469  | 2691014 | 2.9  | 12.8127 | 0.7 | 2.1317 | 1.3 | 0.1982 | 1.1 | 0.84 | 1166 | 12 | 1159 | 9  | 1147 | 14 | 1147 | 14 | 102 |
| EC17-3 | 174 | 149  | 128518  | 2.5  | 10.9232 | 0.7 | 3.2053 | 1.2 | 0.2540 | 0.9 | 0.77 | 1459 | 12 | 1458 | 9  | 1457 | 14 | 1457 | 14 | 100 |
| EC17-3 | 175 | 111  | 80726   | 1.7  | 10.7749 | 0.7 | 3.2268 | 1.2 | 0.2523 | 1.0 | 0.84 | 1450 | 13 | 1464 | 9  | 1483 | 12 | 1483 | 12 | 98  |
| EC17-3 | 176 | 504  | 307771  | 2.4  | 12.3943 | 0.6 | 2.2203 | 1.2 | 0.1997 | 1.1 | 0.87 | 1174 | 11 | 1187 | 9  | 1213 | 12 | 1213 | 12 | 97  |

|        |     |      |         |      |         |     |         |     |        |     |      |      |    |      |    |      |    |      |    |     |
|--------|-----|------|---------|------|---------|-----|---------|-----|--------|-----|------|------|----|------|----|------|----|------|----|-----|
| EC17-3 | 177 | 231  | 133476  | 4.5  | 13.3992 | 0.7 | 1.8323  | 1.2 | 0.1781 | 0.9 | 0.80 | 1057 | 9  | 1057 | 8  | 1058 | 14 | 1058 | 14 | 100 |
| EC17-3 | 178 | 135  | 545467  | 4.2  | 8.6056  | 0.7 | 5.7202  | 1.2 | 0.3572 | 1.0 | 0.83 | 1969 | 16 | 1934 | 10 | 1898 | 12 | 1898 | 12 | 104 |
| EC17-3 | 179 | 588  | 901249  | 2.0  | 17.6957 | 0.9 | 0.5717  | 1.2 | 0.0734 | 0.8 | 0.65 | 457  | 3  | 459  | 4  | 472  | 20 | 457  | 3  | 97  |
| EC17-3 | 180 | 78   | 93204   | 2.5  | 13.3618 | 1.0 | 1.5602  | 1.3 | 0.1513 | 0.8 | 0.64 | 908  | 7  | 955  | 8  | 1063 | 20 | 1063 | 20 | 85  |
| EC17-3 | 182 | 451  | 234837  | 10.3 | 12.5730 | 0.7 | 2.2760  | 1.3 | 0.2076 | 1.2 | 0.87 | 1216 | 13 | 1205 | 10 | 1185 | 13 | 1185 | 13 | 103 |
| EC17-3 | 183 | 252  | 123286  | 2.2  | 13.3386 | 0.8 | 1.8300  | 1.5 | 0.1771 | 1.3 | 0.85 | 1051 | 13 | 1056 | 10 | 1067 | 16 | 1067 | 16 | 99  |
| EC17-3 | 184 | 546  | 2132562 | 4.4  | 12.8857 | 0.6 | 2.0836  | 1.2 | 0.1948 | 1.0 | 0.84 | 1147 | 11 | 1143 | 8  | 1136 | 13 | 1136 | 13 | 101 |
| EC17-3 | 185 | 242  | 186146  | 2.9  | 11.2603 | 0.6 | 2.9006  | 1.3 | 0.2370 | 1.1 | 0.87 | 1371 | 14 | 1382 | 10 | 1399 | 12 | 1399 | 12 | 98  |
| EC17-3 | 186 | 19   | 32543   | 2.4  | 13.8506 | 1.5 | 1.4980  | 1.9 | 0.1505 | 1.2 | 0.64 | 904  | 10 | 930  | 12 | 991  | 30 | 991  | 30 | 91  |
| EC17-3 | 187 | 209  | 110722  | 2.3  | 13.3138 | 0.8 | 1.8764  | 1.3 | 0.1813 | 1.0 | 0.79 | 1074 | 10 | 1073 | 9  | 1071 | 16 | 1071 | 16 | 100 |
| EC17-3 | 188 | 65   | 34235   | 4.7  | 12.2931 | 0.8 | 2.2383  | 1.3 | 0.1996 | 1.0 | 0.78 | 1173 | 11 | 1193 | 9  | 1229 | 16 | 1229 | 16 | 95  |
| EC17-3 | 189 | 280  | 95491   | 2.1  | 13.4845 | 0.7 | 1.7643  | 1.1 | 0.1726 | 0.9 | 0.80 | 1027 | 8  | 1032 | 7  | 1045 | 14 | 1045 | 14 | 98  |
| EC17-3 | 190 | 36   | 27096   | 1.0  | 13.1169 | 1.2 | 1.8595  | 1.6 | 0.1770 | 1.0 | 0.64 | 1050 | 10 | 1067 | 10 | 1100 | 24 | 1100 | 24 | 95  |
| EC17-3 | 191 | 1236 | 366040  | 4.2  | 13.8810 | 0.6 | 1.6860  | 1.0 | 0.1698 | 0.8 | 0.80 | 1011 | 8  | 1003 | 7  | 986  | 13 | 986  | 13 | 103 |
| EC17-3 | 192 | 108  | 99869   | 2.0  | 13.4263 | 0.7 | 1.8282  | 1.1 | 0.1781 | 0.9 | 0.76 | 1057 | 8  | 1056 | 7  | 1054 | 15 | 1054 | 15 | 100 |
| EC17-3 | 193 | 44   | 276466  | 1.4  | 11.6129 | 0.9 | 2.7111  | 1.1 | 0.2284 | 0.7 | 0.65 | 1326 | 9  | 1331 | 9  | 1340 | 17 | 1340 | 17 | 99  |
| EC17-3 | 194 | 555  | 1168312 | 3.6  | 12.6590 | 0.5 | 2.1612  | 1.0 | 0.1985 | 0.9 | 0.87 | 1167 | 10 | 1169 | 7  | 1171 | 10 | 1171 | 10 | 100 |
| EC17-3 | 195 | 100  | 98750   | 1.4  | 13.5560 | 0.8 | 1.7546  | 1.4 | 0.1726 | 1.1 | 0.80 | 1026 | 11 | 1029 | 9  | 1034 | 17 | 1034 | 17 | 99  |
| EC17-3 | 196 | 97   | 74755   | 2.9  | 13.4988 | 0.8 | 1.8035  | 1.2 | 0.1766 | 0.9 | 0.77 | 1049 | 9  | 1047 | 8  | 1043 | 16 | 1043 | 16 | 101 |
| EC17-3 | 197 | 670  | 207961  | 2.1  | 11.7570 | 0.6 | 2.6833  | 1.1 | 0.2289 | 0.9 | 0.84 | 1329 | 11 | 1324 | 8  | 1316 | 11 | 1316 | 11 | 101 |
| EC17-3 | 198 | 48   | 15084   | 1.2  | 13.7190 | 1.2 | 1.7176  | 1.6 | 0.1710 | 1.1 | 0.67 | 1017 | 10 | 1015 | 10 | 1010 | 24 | 1010 | 24 | 101 |
| EC17-3 | 199 | 627  | 771964  | 3.0  | 12.8060 | 0.7 | 2.1558  | 1.5 | 0.2003 | 1.3 | 0.89 | 1177 | 14 | 1167 | 10 | 1148 | 13 | 1148 | 13 | 103 |
| EC17-3 | 200 | 705  | 372870  | 10.3 | 13.2436 | 0.6 | 1.9409  | 1.0 | 0.1865 | 0.8 | 0.79 | 1102 | 8  | 1095 | 7  | 1081 | 13 | 1081 | 13 | 102 |
| EC17-3 | 201 | 336  | 116620  | 2.5  | 12.4138 | 0.7 | 2.2333  | 1.3 | 0.2012 | 1.1 | 0.83 | 1182 | 12 | 1192 | 9  | 1210 | 14 | 1210 | 14 | 98  |
| EC17-3 | 202 | 285  | 108064  | 2.4  | 12.0964 | 0.7 | 2.4774  | 1.2 | 0.2174 | 0.9 | 0.80 | 1268 | 11 | 1265 | 8  | 1261 | 14 | 1261 | 14 | 101 |
| EC17-3 | 203 | 61   | 54011   | 2.9  | 12.6591 | 0.8 | 2.1155  | 1.3 | 0.1943 | 1.0 | 0.79 | 1145 | 11 | 1154 | 9  | 1171 | 16 | 1171 | 16 | 98  |
| EC17-3 | 204 | 221  | 115882  | 2.5  | 12.9496 | 0.7 | 1.9859  | 1.0 | 0.1866 | 0.7 | 0.71 | 1103 | 7  | 1111 | 7  | 1126 | 14 | 1126 | 14 | 98  |
| EC17-3 | 205 | 68   | 46749   | 2.6  | 12.3740 | 0.8 | 2.3417  | 1.3 | 0.2102 | 1.0 | 0.80 | 1230 | 11 | 1225 | 9  | 1216 | 15 | 1216 | 15 | 101 |
| EC17-3 | 206 | 126  | 95361   | 1.2  | 12.7010 | 0.8 | 2.1802  | 1.4 | 0.2009 | 1.2 | 0.81 | 1180 | 13 | 1175 | 10 | 1165 | 16 | 1165 | 16 | 101 |
| EC17-3 | 207 | 35   | 68900   | 1.4  | 13.6587 | 1.1 | 1.7233  | 1.5 | 0.1708 | 1.0 | 0.69 | 1016 | 10 | 1017 | 10 | 1019 | 22 | 1019 | 22 | 100 |
| EC17-3 | 208 | 328  | 72757   | 2.4  | 13.6093 | 0.6 | 1.7832  | 1.3 | 0.1761 | 1.1 | 0.86 | 1046 | 11 | 1039 | 8  | 1026 | 13 | 1026 | 13 | 102 |
| EC17-3 | 209 | 67   | 91580   | 3.1  | 13.5895 | 0.9 | 1.7451  | 1.4 | 0.1721 | 1.0 | 0.74 | 1024 | 10 | 1025 | 9  | 1029 | 19 | 1029 | 19 | 99  |
| EC17-3 | 210 | 543  | 618168  | 7.2  | 13.6177 | 0.8 | 1.6928  | 1.3 | 0.1673 | 1.0 | 0.80 | 997  | 9  | 1006 | 8  | 1025 | 15 | 1025 | 15 | 97  |
| EC17-3 | 211 | 1843 | 340719  | 17.3 | 18.4304 | 0.7 | 0.4315  | 1.2 | 0.0577 | 0.9 | 0.80 | 362  | 3  | 364  | 4  | 381  | 16 | 362  | 3  | NA  |
| EC17-3 | 212 | 41   | 13170   | 1.8  | 10.9198 | 1.0 | 3.1209  | 1.5 | 0.2473 | 1.1 | 0.75 | 1424 | 14 | 1438 | 12 | 1458 | 19 | 1458 | 19 | 98  |
| EC17-3 | 213 | 1597 | 37559   | 8.7  | 12.8909 | 1.1 | 1.8206  | 1.5 | 0.1703 | 1.0 | 0.69 | 1014 | 10 | 1053 | 10 | 1135 | 22 | 1135 | 22 | 89  |
| EC17-3 | 214 | 59   | 1458664 | 1.9  | 13.4969 | 0.9 | 1.7851  | 1.3 | 0.1748 | 0.9 | 0.74 | 1039 | 9  | 1040 | 8  | 1043 | 17 | 1043 | 17 | 100 |
| EC17-3 | 216 | 164  | 3832561 | 1.5  | 5.3014  | 0.7 | 12.8539 | 1.4 | 0.4944 | 1.2 | 0.88 | 2590 | 26 | 2669 | 13 | 2730 | 11 | 2730 | 11 | 95  |
| EC17-3 | 217 | 210  | 112602  | 1.5  | 10.9496 | 0.7 | 3.0769  | 1.1 | 0.2445 | 0.8 | 0.75 | 1410 | 11 | 1427 | 9  | 1453 | 14 | 1453 | 14 | 97  |
| EC17-3 | 218 | 99   | 125358  | 2.3  | 13.4410 | 1.0 | 1.7823  | 1.4 | 0.1738 | 1.0 | 0.72 | 1033 | 10 | 1039 | 9  | 1051 | 20 | 1051 | 20 | 98  |
| EC17-3 | 219 | 537  | 406200  | 10.4 | 13.5768 | 0.6 | 1.7373  | 1.4 | 0.1711 | 1.3 | 0.92 | 1018 | 12 | 1022 | 9  | 1031 | 11 | 1031 | 11 | 99  |
| EC17-3 | 220 | 799  | 64985   | 2.0  | 11.8571 | 0.6 | 2.1137  | 2.3 | 0.1818 | 2.2 | 0.97 | 1077 | 22 | 1153 | 16 | 1299 | 11 | 1299 | 11 | 83  |
| EC17-3 | 221 | 81   | 99348   | 0.8  | 12.6192 | 0.9 | 2.1564  | 1.3 | 0.1974 | 1.0 | 0.74 | 1162 | 10 | 1167 | 9  | 1177 | 17 | 1177 | 17 | 99  |
| EC17-3 | 222 | 287  | 250655  | 2.3  | 13.5219 | 0.6 | 1.8159  | 1.1 | 0.1782 | 0.9 | 0.84 | 1057 | 9  | 1051 | 7  | 1039 | 12 | 1039 | 12 | 102 |
| EC17-3 | 223 | 130  | 304413  | 3.7  | 13.4608 | 0.9 | 1.7553  | 1.2 | 0.1714 | 0.9 | 0.69 | 1020 | 8  | 1029 | 8  | 1048 | 18 | 1048 | 18 | 97  |
| EC17-3 | 224 | 47   | 701455  | 8.8  | 16.2351 | 1.1 | 0.8788  | 1.4 | 0.1035 | 0.8 | 0.61 | 635  | 5  | 640  | 7  | 659  | 24 | 635  | 5  | 96  |

|        |     |     |         |     |         |     |        |     |        |     |      |      |    |      |    |      |    |      |    |     |
|--------|-----|-----|---------|-----|---------|-----|--------|-----|--------|-----|------|------|----|------|----|------|----|------|----|-----|
| EC17-3 | 225 | 241 | 132853  | 1.2 | 13.4508 | 0.6 | 1.8975 | 1.1 | 0.1852 | 0.9 | 0.85 | 1095 | 9  | 1080 | 7  | 1050 | 12 | 1050 | 12 | 104 |
| EC17-3 | 226 | 276 | 103497  | 1.9 | 11.5886 | 0.6 | 2.7184 | 1.2 | 0.2286 | 1.0 | 0.84 | 1327 | 12 | 1334 | 9  | 1344 | 12 | 1344 | 12 | 99  |
| EC17-3 | 227 | 129 | 98573   | 4.6 | 11.1689 | 0.9 | 2.9560 | 1.4 | 0.2395 | 1.1 | 0.78 | 1384 | 13 | 1396 | 10 | 1415 | 16 | 1415 | 16 | 98  |
| EC17-3 | 228 | 182 | 80561   | 4.2 | 12.7164 | 1.1 | 2.1965 | 1.4 | 0.2027 | 0.9 | 0.63 | 1190 | 9  | 1180 | 10 | 1162 | 21 | 1162 | 21 | 102 |
| EC17-3 | 229 | 131 | 46076   | 0.6 | 13.3570 | 0.9 | 1.8598 | 1.4 | 0.1802 | 1.0 | 0.77 | 1068 | 10 | 1067 | 9  | 1064 | 18 | 1064 | 18 | 100 |
| EC17-3 | 230 | 284 | 789739  | 2.5 | 18.0184 | 0.9 | 0.4757 | 1.4 | 0.0622 | 1.1 | 0.77 | 389  | 4  | 395  | 5  | 431  | 20 | 389  | 4  | NA  |
| EC17-3 | 231 | 297 | 161183  | 2.5 | 12.6646 | 0.6 | 2.1837 | 1.2 | 0.2007 | 1.1 | 0.87 | 1179 | 12 | 1176 | 9  | 1170 | 12 | 1170 | 12 | 101 |
| EC17-3 | 232 | 160 | 170960  | 1.8 | 12.4292 | 0.7 | 2.3423 | 1.4 | 0.2112 | 1.1 | 0.84 | 1235 | 13 | 1225 | 10 | 1207 | 15 | 1207 | 15 | 102 |
| EC17-3 | 233 | 402 | 127508  | 2.7 | 11.7676 | 0.5 | 2.7124 | 1.6 | 0.2316 | 1.6 | 0.96 | 1343 | 19 | 1332 | 12 | 1314 | 9  | 1314 | 9  | 102 |
| EC17-3 | 234 | 36  | 13446   | 1.8 | 13.4233 | 1.1 | 1.8793 | 1.5 | 0.1830 | 1.1 | 0.71 | 1084 | 11 | 1074 | 10 | 1054 | 21 | 1054 | 21 | 103 |
| EC17-3 | 235 | 111 | 30892   | 2.3 | 13.6591 | 0.9 | 1.7509 | 1.5 | 0.1735 | 1.1 | 0.79 | 1032 | 11 | 1028 | 9  | 1019 | 18 | 1019 | 18 | 101 |
| EC17-3 | 236 | 174 | 7982266 | 2.7 | 11.0877 | 0.6 | 3.0553 | 1.1 | 0.2458 | 0.9 | 0.86 | 1417 | 12 | 1422 | 8  | 1429 | 11 | 1429 | 11 | 99  |
| EC17-3 | 237 | 123 | 1326477 | 1.0 | 8.3919  | 0.6 | 5.8455 | 1.0 | 0.3559 | 0.9 | 0.83 | 1963 | 14 | 1953 | 9  | 1943 | 10 | 1943 | 10 | 101 |
| EC17-3 | 238 | 83  | 51831   | 2.5 | 12.1550 | 0.7 | 2.3391 | 1.3 | 0.2063 | 1.1 | 0.85 | 1209 | 12 | 1224 | 9  | 1251 | 14 | 1251 | 14 | 97  |
| EC17-3 | 239 | 131 | 705835  | 7.2 | 13.3089 | 0.8 | 1.7791 | 1.1 | 0.1718 | 0.7 | 0.66 | 1022 | 7  | 1038 | 7  | 1071 | 16 | 1071 | 16 | 95  |
| EC17-3 | 240 | 91  | 416756  | 4.0 | 12.6515 | 0.8 | 2.1908 | 1.2 | 0.2011 | 0.9 | 0.74 | 1181 | 9  | 1178 | 8  | 1172 | 16 | 1172 | 16 | 101 |
| EC17-3 | 241 | 134 | 709648  | 2.4 | 13.4444 | 0.6 | 1.8575 | 1.4 | 0.1812 | 1.2 | 0.89 | 1074 | 12 | 1066 | 9  | 1051 | 13 | 1051 | 13 | 102 |
| EC17-3 | 242 | 78  | 21044   | 2.3 | 13.5557 | 0.7 | 1.7761 | 1.2 | 0.1747 | 1.0 | 0.81 | 1038 | 9  | 1037 | 8  | 1034 | 15 | 1034 | 15 | 100 |
| EC17-3 | 243 | 165 | 94198   | 1.4 | 13.2645 | 0.6 | 1.9085 | 1.3 | 0.1837 | 1.1 | 0.86 | 1087 | 11 | 1084 | 8  | 1078 | 13 | 1078 | 13 | 101 |
| EC17-3 | 245 | 282 | 141454  | 2.0 | 13.5044 | 0.7 | 1.7979 | 1.3 | 0.1762 | 1.1 | 0.82 | 1046 | 10 | 1045 | 8  | 1042 | 15 | 1042 | 15 | 100 |
| EC17-3 | 246 | 127 | 113889  | 8.7 | 12.8021 | 0.7 | 2.0812 | 1.1 | 0.1933 | 0.8 | 0.73 | 1139 | 8  | 1143 | 7  | 1149 | 14 | 1149 | 14 | 99  |
| EC17-3 | 247 | 268 | 92764   | 6.3 | 12.2656 | 0.8 | 2.3605 | 1.4 | 0.2101 | 1.1 | 0.79 | 1229 | 12 | 1231 | 10 | 1233 | 17 | 1233 | 17 | 100 |
| EC17-3 | 248 | 192 | 94610   | 1.9 | 10.8474 | 0.6 | 3.2579 | 1.0 | 0.2564 | 0.8 | 0.78 | 1471 | 10 | 1471 | 8  | 1470 | 12 | 1470 | 12 | 100 |
| EC17-3 | 249 | 582 | 308519  | 4.3 | 13.0927 | 0.7 | 1.9397 | 1.3 | 0.1843 | 1.0 | 0.82 | 1090 | 10 | 1095 | 8  | 1104 | 15 | 1104 | 15 | 99  |
| EC17-3 | 250 | 97  | 80001   | 2.7 | 13.4957 | 0.8 | 1.6941 | 1.1 | 0.1659 | 0.8 | 0.70 | 989  | 7  | 1006 | 7  | 1043 | 16 | 1043 | 16 | 95  |
| EC17-3 | 251 | 61  | 265802  | 2.2 | 13.5617 | 0.8 | 1.7743 | 1.4 | 0.1746 | 1.1 | 0.80 | 1037 | 11 | 1036 | 9  | 1033 | 17 | 1033 | 17 | 100 |
| EC17-3 | 253 | 208 | 247606  | 2.7 | 13.3767 | 0.7 | 1.7996 | 1.1 | 0.1747 | 0.9 | 0.80 | 1038 | 8  | 1045 | 7  | 1061 | 13 | 1061 | 13 | 98  |
| EC17-3 | 256 | 364 | 324132  | 3.0 | 13.3939 | 0.6 | 1.8768 | 1.2 | 0.1824 | 1.0 | 0.88 | 1080 | 10 | 1073 | 8  | 1059 | 11 | 1059 | 11 | 102 |
| EC17-3 | 257 | 192 | 277089  | 3.4 | 12.8743 | 0.7 | 2.1060 | 1.0 | 0.1967 | 0.7 | 0.71 | 1158 | 7  | 1151 | 7  | 1138 | 13 | 1138 | 13 | 102 |
| EC17-3 | 258 | 89  | 35818   | 1.5 | 13.3721 | 0.8 | 1.8208 | 1.1 | 0.1767 | 0.8 | 0.73 | 1049 | 8  | 1053 | 8  | 1062 | 16 | 1062 | 16 | 99  |
| EC17-3 | 259 | 67  | 25630   | 1.5 | 12.2164 | 0.9 | 2.0809 | 1.2 | 0.1844 | 0.9 | 0.68 | 1091 | 9  | 1143 | 9  | 1241 | 18 | 1241 | 18 | 88  |
| EC17-3 | 260 | 346 | 148852  | 3.7 | 12.7290 | 0.5 | 2.1686 | 1.1 | 0.2003 | 1.0 | 0.88 | 1177 | 10 | 1171 | 8  | 1160 | 10 | 1160 | 10 | 101 |
| EC17-3 | 261 | 167 | 265216  | 2.1 | 10.8559 | 0.7 | 3.3056 | 1.1 | 0.2604 | 0.9 | 0.80 | 1492 | 12 | 1482 | 9  | 1469 | 13 | 1469 | 13 | 102 |
| EC17-3 | 262 | 130 | 70984   | 2.8 | 13.4221 | 0.7 | 1.8263 | 1.1 | 0.1779 | 0.8 | 0.73 | 1055 | 8  | 1055 | 7  | 1054 | 15 | 1054 | 15 | 100 |
| EC17-3 | 263 | 91  | 71920   | 1.3 | 11.4255 | 0.8 | 2.8442 | 1.5 | 0.2358 | 1.3 | 0.85 | 1365 | 16 | 1367 | 11 | 1371 | 16 | 1371 | 16 | 100 |
| EC17-3 | 264 | 79  | 62290   | 1.5 | 17.2676 | 1.2 | 0.5573 | 1.5 | 0.0698 | 0.9 | 0.60 | 435  | 4  | 450  | 6  | 525  | 26 | 435  | 4  | 83  |
| EC17-3 | 265 | 635 | 340760  | 2.0 | 12.6312 | 0.5 | 2.2341 | 1.1 | 0.2048 | 1.0 | 0.88 | 1201 | 11 | 1192 | 8  | 1176 | 11 | 1176 | 11 | 102 |
| EC17-3 | 266 | 855 | 191024  | 1.2 | 12.7682 | 0.5 | 1.9727 | 1.2 | 0.1828 | 1.2 | 0.93 | 1082 | 11 | 1106 | 8  | 1154 | 9  | 1154 | 9  | 94  |
| EC17-3 | 267 | 346 | 94328   | 2.4 | 12.2771 | 0.6 | 2.3045 | 1.1 | 0.2053 | 1.0 | 0.85 | 1204 | 11 | 1214 | 8  | 1232 | 12 | 1232 | 12 | 98  |
| EC17-3 | 268 | 333 | 362693  | 2.4 | 12.7439 | 0.8 | 2.0061 | 1.3 | 0.1855 | 1.1 | 0.80 | 1097 | 11 | 1118 | 9  | 1158 | 16 | 1158 | 16 | 95  |
| EC17-3 | 269 | 247 | 229488  | 2.7 | 13.4336 | 0.9 | 1.8822 | 1.3 | 0.1835 | 1.0 | 0.72 | 1086 | 10 | 1075 | 9  | 1053 | 19 | 1053 | 19 | 103 |
| EC17-3 | 270 | 333 | 116277  | 2.2 | 12.0378 | 0.6 | 2.0232 | 1.5 | 0.1767 | 1.4 | 0.91 | 1049 | 13 | 1123 | 10 | 1270 | 12 | 1270 | 12 | 83  |
| EC17-3 | 271 | 113 | 52658   | 1.3 | 12.3999 | 0.7 | 2.2547 | 1.2 | 0.2029 | 1.0 | 0.83 | 1191 | 11 | 1198 | 8  | 1212 | 13 | 1212 | 13 | 98  |
| EC17-3 | 272 | 333 | 187001  | 5.5 | 12.4119 | 0.7 | 2.2001 | 1.3 | 0.1981 | 1.1 | 0.84 | 1165 | 12 | 1181 | 9  | 1210 | 14 | 1210 | 14 | 96  |
| EC17-3 | 273 | 72  | 61769   | 1.9 | 10.9980 | 0.6 | 3.1173 | 1.1 | 0.2488 | 0.9 | 0.82 | 1432 | 11 | 1437 | 8  | 1444 | 12 | 1444 | 12 | 99  |
| EC17-3 | 274 | 663 | 1584106 | 2.7 | 10.5865 | 0.6 | 3.5136 | 1.0 | 0.2699 | 0.8 | 0.82 | 1540 | 11 | 1530 | 8  | 1516 | 11 | 1516 | 11 | 102 |

|        |     |      |         |      |         |     |        |     |        |     |      |      |    |      |    |      |    |      |    |     |
|--------|-----|------|---------|------|---------|-----|--------|-----|--------|-----|------|------|----|------|----|------|----|------|----|-----|
| EC17-3 | 275 | 46   | 43797   | 2.8  | 13.5454 | 1.0 | 1.7879 | 1.5 | 0.1757 | 1.1 | 0.74 | 1044 | 10 | 1041 | 10 | 1036 | 20 | 1036 | 20 | 101 |
| EC17-3 | 276 | 161  | 207676  | 2.4  | 13.4702 | 0.8 | 1.7967 | 1.1 | 0.1756 | 0.9 | 0.75 | 1043 | 8  | 1044 | 7  | 1047 | 15 | 1047 | 15 | 100 |
| EC17-3 | 277 | 52   | 104008  | 3.6  | 13.1675 | 1.0 | 1.7775 | 1.4 | 0.1698 | 1.0 | 0.73 | 1011 | 10 | 1037 | 9  | 1093 | 20 | 1093 | 20 | 93  |
| EC17-3 | 278 | 305  | 323207  | 3.7  | 13.4869 | 0.7 | 1.7848 | 1.2 | 0.1747 | 1.0 | 0.82 | 1038 | 9  | 1040 | 8  | 1045 | 13 | 1045 | 13 | 99  |
| EC17-3 | 279 | 200  | 156707  | 1.7  | 12.8050 | 0.6 | 2.1101 | 1.0 | 0.1960 | 0.9 | 0.82 | 1154 | 9  | 1152 | 7  | 1148 | 12 | 1148 | 12 | 100 |
| EC17-3 | 280 | 231  | 265900  | 2.2  | 11.0949 | 0.7 | 3.0952 | 1.1 | 0.2492 | 0.8 | 0.77 | 1434 | 11 | 1432 | 8  | 1427 | 13 | 1427 | 13 | 100 |
| EC17-3 | 281 | 103  | 194938  | 3.4  | 14.4892 | 0.9 | 1.4463 | 1.3 | 0.1521 | 0.9 | 0.70 | 912  | 8  | 908  | 8  | 898  | 19 | 898  | 19 | 102 |
| EC17-3 | 282 | 135  | 49828   | 1.6  | 13.6474 | 0.7 | 1.7705 | 1.0 | 0.1753 | 0.8 | 0.73 | 1041 | 7  | 1035 | 7  | 1021 | 14 | 1021 | 14 | 102 |
| EC17-3 | 283 | 645  | 109206  | 1.8  | 13.1428 | 0.7 | 1.9033 | 1.1 | 0.1815 | 0.9 | 0.78 | 1075 | 9  | 1082 | 7  | 1097 | 14 | 1097 | 14 | 98  |
| EC17-3 | 284 | 370  | 161437  | 3.3  | 11.6895 | 0.9 | 2.3249 | 1.6 | 0.1972 | 1.3 | 0.83 | 1160 | 14 | 1220 | 11 | 1327 | 17 | 1327 | 17 | 87  |
| EC17-3 | 285 | 402  | 684160  | 8.5  | 8.8407  | 0.6 | 5.3001 | 1.6 | 0.3400 | 1.4 | 0.93 | 1887 | 24 | 1869 | 13 | 1849 | 10 | 1849 | 10 | 102 |
| EC17-3 | 286 | 274  | 125777  | 1.9  | 10.9494 | 0.6 | 3.3223 | 1.1 | 0.2639 | 1.0 | 0.85 | 1510 | 13 | 1486 | 9  | 1453 | 11 | 1453 | 11 | 104 |
| EC17-3 | 287 | 406  | 691903  | 2.8  | 13.3909 | 0.7 | 1.8151 | 1.3 | 0.1764 | 1.1 | 0.87 | 1047 | 11 | 1051 | 9  | 1059 | 13 | 1059 | 13 | 99  |
| EC17-3 | 288 | 111  | 339460  | 1.3  | 13.6648 | 0.8 | 1.7347 | 1.1 | 0.1720 | 0.8 | 0.71 | 1023 | 7  | 1022 | 7  | 1018 | 16 | 1018 | 16 | 100 |
| EC17-3 | 289 | 120  | 101005  | 2.8  | 13.7557 | 0.7 | 1.7077 | 1.3 | 0.1704 | 1.0 | 0.82 | 1015 | 10 | 1011 | 8  | 1005 | 15 | 1005 | 15 | 101 |
| EC17-3 | 290 | 333  | 116518  | 3.4  | 13.6142 | 0.6 | 1.7362 | 1.0 | 0.1715 | 0.9 | 0.83 | 1020 | 8  | 1022 | 7  | 1026 | 12 | 1026 | 12 | 99  |
| EC17-3 | 291 | 665  | 258940  | 2.3  | 12.3368 | 0.7 | 2.3578 | 1.0 | 0.2111 | 0.8 | 0.75 | 1234 | 9  | 1230 | 7  | 1222 | 13 | 1222 | 13 | 101 |
| EC17-3 | 292 | 182  | 1847999 | 3.8  | 13.5538 | 0.7 | 1.7413 | 1.1 | 0.1712 | 0.9 | 0.80 | 1019 | 9  | 1024 | 7  | 1035 | 14 | 1035 | 14 | 98  |
| EC17-3 | 293 | 212  | 152659  | 3.8  | 12.1082 | 0.7 | 2.4500 | 1.3 | 0.2152 | 1.1 | 0.82 | 1257 | 12 | 1257 | 9  | 1259 | 14 | 1259 | 14 | 100 |
| EC17-3 | 294 | 64   | 375409  | 1.0  | 13.3341 | 0.9 | 1.8609 | 1.4 | 0.1800 | 1.0 | 0.74 | 1067 | 10 | 1067 | 9  | 1068 | 19 | 1068 | 19 | 100 |
| EC17-3 | 295 | 166  | 62068   | 2.4  | 12.6458 | 0.8 | 2.1331 | 1.1 | 0.1957 | 0.7 | 0.68 | 1152 | 8  | 1160 | 8  | 1173 | 16 | 1173 | 16 | 98  |
| EC17-3 | 296 | 364  | 140389  | 2.8  | 13.5881 | 0.6 | 1.7402 | 1.2 | 0.1716 | 1.0 | 0.88 | 1021 | 10 | 1024 | 8  | 1029 | 11 | 1029 | 11 | 99  |
| EC17-3 | 297 | 65   | 23384   | 1.4  | 13.3895 | 0.8 | 1.8704 | 1.2 | 0.1817 | 0.9 | 0.75 | 1076 | 9  | 1071 | 8  | 1059 | 16 | 1059 | 16 | 102 |
| EC17-3 | 298 | 1067 | 340918  | 23.9 | 13.4158 | 0.8 | 1.8512 | 1.4 | 0.1802 | 1.2 | 0.84 | 1068 | 11 | 1064 | 9  | 1055 | 15 | 1055 | 15 | 101 |
| EC17-3 | 299 | 181  | 91753   | 2.7  | 13.5073 | 0.8 | 1.7955 | 1.2 | 0.1760 | 0.9 | 0.77 | 1045 | 9  | 1044 | 8  | 1041 | 15 | 1041 | 15 | 100 |
| EC17-3 | 300 | 176  | 93381   | 4.4  | 12.7205 | 0.7 | 2.1484 | 1.2 | 0.1983 | 0.9 | 0.77 | 1166 | 10 | 1165 | 8  | 1162 | 15 | 1162 | 15 | 100 |
| EC17-3 | 301 | 334  | 111871  | 2.7  | 13.3791 | 0.8 | 1.8653 | 1.2 | 0.1811 | 0.9 | 0.76 | 1073 | 9  | 1069 | 8  | 1061 | 15 | 1061 | 15 | 101 |
| EC17-3 | 302 | 111  | 131305  | 2.2  | 13.3924 | 0.7 | 1.8190 | 1.1 | 0.1768 | 0.8 | 0.77 | 1049 | 8  | 1052 | 7  | 1059 | 14 | 1059 | 14 | 99  |
| EC17-3 | 303 | 87   | 37044   | 2.9  | 13.9549 | 0.9 | 1.4975 | 1.4 | 0.1516 | 1.1 | 0.78 | 910  | 9  | 929  | 9  | 975  | 18 | 975  | 18 | 93  |
| EC17-3 | 304 | 230  | 93909   | 2.5  | 13.1110 | 0.8 | 1.9238 | 1.3 | 0.1830 | 0.9 | 0.75 | 1083 | 9  | 1089 | 8  | 1101 | 17 | 1101 | 17 | 98  |
| EC17-3 | 305 | 589  | 180722  | 5.8  | 13.5653 | 0.7 | 1.7670 | 1.3 | 0.1739 | 1.1 | 0.85 | 1034 | 10 | 1033 | 8  | 1033 | 14 | 1033 | 14 | 100 |
| EC17-3 | 306 | 190  | 21206   | 3.3  | 12.2443 | 2.3 | 1.9787 | 2.7 | 0.1758 | 1.4 | 0.51 | 1044 | 13 | 1108 | 18 | 1237 | 45 | 1237 | 45 | 84  |
| EC17-3 | 307 | 54   | 715461  | 2.5  | 13.3346 | 1.1 | 1.7612 | 1.5 | 0.1704 | 0.9 | 0.64 | 1014 | 9  | 1031 | 10 | 1067 | 23 | 1067 | 23 | 95  |
| EC17-3 | 309 | 417  | 116191  | 5.7  | 13.6034 | 0.6 | 1.7427 | 1.2 | 0.1720 | 1.0 | 0.87 | 1023 | 10 | 1024 | 8  | 1027 | 12 | 1027 | 12 | 100 |
| EC17-3 | 310 | 827  | 503021  | 4.1  | 13.4027 | 0.6 | 1.8629 | 0.9 | 0.1812 | 0.7 | 0.76 | 1073 | 7  | 1068 | 6  | 1057 | 12 | 1057 | 12 | 102 |
| EC17-3 | 311 | 213  | 118410  | 3.2  | 10.8537 | 0.6 | 3.2541 | 1.1 | 0.2563 | 0.9 | 0.85 | 1471 | 12 | 1470 | 8  | 1469 | 11 | 1469 | 11 | 100 |
| EC17-3 | 312 | 413  | 250745  | 5.9  | 13.3193 | 0.7 | 1.9515 | 1.2 | 0.1886 | 0.9 | 0.80 | 1114 | 10 | 1099 | 8  | 1070 | 14 | 1070 | 14 | 104 |
| EC17-3 | 313 | 187  | 170773  | 1.0  | 9.8973  | 0.6 | 4.0327 | 1.2 | 0.2896 | 1.0 | 0.86 | 1640 | 15 | 1641 | 10 | 1642 | 11 | 1642 | 11 | 100 |
| EC17-3 | 314 | 61   | 3144    | 2.7  | 12.2847 | 4.0 | 2.2711 | 4.2 | 0.2024 | 1.4 | 0.32 | 1188 | 15 | 1203 | 30 | 1230 | 79 | 1230 | 79 | 97  |
| EC17-3 | 315 | 101  | 479633  | 0.8  | 13.2474 | 0.8 | 1.9010 | 1.4 | 0.1827 | 1.2 | 0.85 | 1082 | 12 | 1081 | 10 | 1081 | 15 | 1081 | 15 | 100 |

|            |       |       |         |      |         |     | Isotope ratios |     |        |     |       | Apparent ages (Ma) |      |        |      |        |      |          |      |      |
|------------|-------|-------|---------|------|---------|-----|----------------|-----|--------|-----|-------|--------------------|------|--------|------|--------|------|----------|------|------|
| Corbin     | Grain | U     | 206Pb   | U/Th | 206Pb*  | ±   | 207Pb*         | ±   | 206Pb* | ±   | error | 206Pb*             | ±    | 207Pb* | ±    | 206Pb* | ±    | Best age | ±    | Conc |
| Sample No. | No.   | (ppm) | 204Pb   |      | 207Pb*  | (%) | 235U*          | (%) | 238U   | (%) | corr. | 238U*              | (Ma) | 235U   | (Ma) | 207Pb* | (Ma) | (Ma)     | (Ma) | (%)  |
| SL19-1     | 1     | 166   | 108262  | 1.2  | 9.8978  | 0.6 | 4.0166         | 1.2 | 0.2885 | 1.0 | 0.85  | 1634               | 15   | 1638   | 10   | 1642   | 12   | 1642     | 12   | 99   |
| SL19-1     | 2     | 788   | 1801182 | 3.3  | 12.5814 | 0.7 | 2.1940         | 1.6 | 0.2003 | 1.4 | 0.88  | 1177               | 15   | 1179   | 11   | 1183   | 14   | 1183     | 14   | 99   |

|        |    |      |        |      |         |     |         |     |        |     |      |      |    |      |    |      |    |      |    |     |
|--------|----|------|--------|------|---------|-----|---------|-----|--------|-----|------|------|----|------|----|------|----|------|----|-----|
| SL19-1 | 3  | 271  | 113255 | 1.4  | 9.6524  | 0.8 | 4.2727  | 1.5 | 0.2992 | 1.3 | 0.84 | 1688 | 19 | 1688 | 13 | 1689 | 15 | 1689 | 15 | 100 |
| SL19-1 | 4  | 53   | 190695 | 3.0  | 12.5217 | 1.0 | 2.1410  | 1.7 | 0.1945 | 1.3 | 0.79 | 1146 | 14 | 1162 | 12 | 1193 | 20 | 1193 | 20 | 96  |
| SL19-1 | 5  | 724  | 94626  | 4.5  | 12.4844 | 0.7 | 2.1799  | 1.5 | 0.1975 | 1.3 | 0.89 | 1162 | 14 | 1175 | 10 | 1199 | 13 | 1199 | 13 | 97  |
| SL19-1 | 6  | 146  | 109881 | 2.6  | 5.2595  | 0.8 | 14.1945 | 1.6 | 0.5417 | 1.4 | 0.87 | 2791 | 31 | 2763 | 15 | 2743 | 13 | 2743 | 13 | 102 |
| SL19-1 | 7  | 50   | 47774  | 1.9  | 11.3914 | 1.0 | 2.7384  | 1.6 | 0.2263 | 1.2 | 0.78 | 1315 | 14 | 1339 | 12 | 1377 | 19 | 1377 | 19 | 96  |
| SL19-1 | 8  | 387  | 329837 | 2.9  | 14.1322 | 0.7 | 1.4671  | 1.2 | 0.1504 | 1.0 | 0.80 | 903  | 8  | 917  | 7  | 950  | 14 | 950  | 14 | 95  |
| SL19-1 | 9  | 63   | 39178  | 0.8  | 13.2542 | 1.3 | 1.7325  | 1.9 | 0.1666 | 1.4 | 0.74 | 993  | 13 | 1021 | 12 | 1080 | 26 | 1080 | 26 | 92  |
| SL19-1 | 10 | 70   | 117579 | 1.0  | 5.5619  | 0.8 | 12.3328 | 1.1 | 0.4977 | 0.8 | 0.74 | 2604 | 18 | 2630 | 11 | 2650 | 13 | 2650 | 13 | 98  |
| SL19-1 | 11 | 362  | 162067 | 1.4  | 9.6694  | 0.8 | 4.1198  | 1.5 | 0.2890 | 1.2 | 0.82 | 1637 | 17 | 1658 | 12 | 1686 | 15 | 1686 | 15 | 97  |
| SL19-1 | 12 | 797  | 250854 | 3.7  | 13.5055 | 1.1 | 1.7997  | 2.0 | 0.1764 | 1.7 | 0.84 | 1047 | 16 | 1045 | 13 | 1042 | 22 | 1042 | 22 | 101 |
| SL19-1 | 13 | 85   | 209913 | 2.5  | 13.1439 | 1.1 | 1.9204  | 1.7 | 0.1831 | 1.3 | 0.78 | 1084 | 13 | 1088 | 11 | 1096 | 21 | 1096 | 21 | 99  |
| SL19-1 | 14 | 208  | 29439  | 1.5  | 13.0930 | 0.9 | 2.0065  | 1.4 | 0.1906 | 1.0 | 0.76 | 1125 | 11 | 1118 | 9  | 1104 | 18 | 1104 | 18 | 102 |
| SL19-1 | 15 | 927  | 379451 | 2.2  | 12.8371 | 0.9 | 2.1004  | 1.5 | 0.1956 | 1.2 | 0.80 | 1152 | 13 | 1149 | 10 | 1143 | 18 | 1143 | 18 | 101 |
| SL19-1 | 16 | 733  | 630067 | 19.5 | 5.4172  | 1.0 | 12.7657 | 1.7 | 0.5018 | 1.4 | 0.83 | 2621 | 31 | 2663 | 16 | 2694 | 16 | 2694 | 16 | 97  |
| SL19-1 | 17 | 13   | 5619   | 2.7  | 13.2586 | 2.1 | 1.9535  | 2.4 | 0.1879 | 1.2 | 0.51 | 1110 | 12 | 1100 | 16 | 1079 | 41 | 1079 | 41 | 103 |
| SL19-1 | 18 | 1138 | 986419 | 2.5  | 13.6698 | 0.8 | 1.6660  | 1.6 | 0.1652 | 1.4 | 0.88 | 986  | 13 | 996  | 10 | 1017 | 15 | 1017 | 15 | 97  |
| SL19-1 | 19 | 164  | 96639  | 3.1  | 12.6633 | 0.9 | 2.1725  | 1.5 | 0.1996 | 1.1 | 0.77 | 1173 | 12 | 1172 | 10 | 1171 | 19 | 1171 | 19 | 100 |
| SL19-1 | 20 | 1196 | 217819 | 2.9  | 8.9209  | 0.9 | 4.3588  | 1.6 | 0.2821 | 1.3 | 0.83 | 1602 | 19 | 1705 | 13 | 1833 | 16 | 1833 | 16 | 87  |
| SL19-1 | 21 | 145  | 54568  | 2.8  | 12.5400 | 1.1 | 2.1642  | 1.7 | 0.1969 | 1.3 | 0.76 | 1159 | 14 | 1170 | 12 | 1190 | 22 | 1190 | 22 | 97  |
| SL19-1 | 22 | 244  | 61253  | 2.7  | 15.8072 | 0.8 | 0.8756  | 1.4 | 0.1004 | 1.1 | 0.84 | 617  | 7  | 639  | 7  | 716  | 16 | 617  | 7  | 86  |
| SL19-1 | 23 | 121  | 150935 | 1.4  | 13.4036 | 0.9 | 1.7468  | 1.3 | 0.1699 | 0.9 | 0.71 | 1011 | 9  | 1026 | 9  | 1057 | 19 | 1057 | 19 | 96  |
| SL19-1 | 24 | 178  | 200035 | 5.2  | 13.0062 | 0.8 | 2.0101  | 1.4 | 0.1897 | 1.2 | 0.84 | 1120 | 12 | 1119 | 10 | 1117 | 15 | 1117 | 15 | 100 |
| SL19-1 | 26 | 160  | 26636  | 6.9  | 13.1437 | 1.0 | 1.9034  | 1.5 | 0.1815 | 1.1 | 0.73 | 1075 | 11 | 1082 | 10 | 1096 | 21 | 1096 | 21 | 98  |
| SL19-1 | 27 | 112  | 386619 | 1.2  | 10.2656 | 0.8 | 3.4621  | 1.6 | 0.2579 | 1.3 | 0.85 | 1479 | 18 | 1519 | 12 | 1574 | 16 | 1574 | 16 | 94  |
| SL19-1 | 28 | 236  | 49376  | 1.7  | 12.4456 | 0.8 | 2.2227  | 1.4 | 0.2007 | 1.1 | 0.83 | 1179 | 12 | 1188 | 10 | 1205 | 15 | 1205 | 15 | 98  |
| SL19-1 | 29 | 247  | 33160  | 2.9  | 13.6402 | 0.7 | 1.7519  | 1.5 | 0.1734 | 1.3 | 0.87 | 1031 | 12 | 1028 | 10 | 1022 | 15 | 1022 | 15 | 101 |
| SL19-1 | 30 | 115  | 78254  | 2.3  | 11.1069 | 0.9 | 2.9392  | 1.4 | 0.2369 | 1.1 | 0.77 | 1370 | 13 | 1392 | 11 | 1425 | 17 | 1425 | 17 | 96  |
| SL19-1 | 31 | 304  | 181719 | 3.1  | 9.4202  | 0.9 | 4.2685  | 1.6 | 0.2918 | 1.4 | 0.84 | 1650 | 20 | 1687 | 14 | 1734 | 16 | 1734 | 16 | 95  |
| SL19-1 | 32 | 104  | 19627  | 1.6  | 9.5396  | 0.8 | 4.2851  | 1.4 | 0.2966 | 1.1 | 0.79 | 1674 | 16 | 1690 | 11 | 1710 | 15 | 1710 | 15 | 98  |
| SL19-1 | 33 | 248  | 87838  | 1.0  | 9.1238  | 0.8 | 4.8371  | 1.5 | 0.3202 | 1.2 | 0.85 | 1791 | 19 | 1791 | 12 | 1792 | 14 | 1792 | 14 | 100 |
| SL19-1 | 34 | 188  | 70802  | 3.0  | 13.3975 | 0.7 | 1.7403  | 1.3 | 0.1692 | 1.1 | 0.84 | 1008 | 10 | 1024 | 9  | 1058 | 15 | 1058 | 15 | 95  |
| SL19-1 | 35 | 94   | 49370  | 1.9  | 11.9188 | 1.0 | 2.5624  | 1.6 | 0.2216 | 1.3 | 0.80 | 1290 | 15 | 1290 | 12 | 1289 | 19 | 1289 | 19 | 100 |
| SL19-1 | 36 | 48   | 10666  | 1.7  | 13.5874 | 1.4 | 1.8396  | 1.9 | 0.1814 | 1.4 | 0.72 | 1074 | 14 | 1060 | 13 | 1030 | 27 | 1030 | 27 | 104 |
| SL19-1 | 37 | 446  | 211638 | 2.2  | 13.6569 | 0.7 | 1.6116  | 1.3 | 0.1597 | 1.1 | 0.84 | 955  | 10 | 975  | 8  | 1019 | 14 | 1019 | 14 | 94  |
| SL19-1 | 38 | 287  | 114310 | 0.8  | 13.3047 | 0.8 | 1.8202  | 1.4 | 0.1757 | 1.1 | 0.81 | 1044 | 11 | 1053 | 9  | 1072 | 17 | 1072 | 17 | 97  |
| SL19-1 | 39 | 110  | 494216 | 0.9  | 9.8069  | 0.9 | 4.0092  | 1.4 | 0.2853 | 1.1 | 0.77 | 1618 | 15 | 1636 | 11 | 1659 | 16 | 1659 | 16 | 97  |
| SL19-1 | 40 | 793  | 510146 | 7.9  | 5.7473  | 0.8 | 11.3597 | 1.4 | 0.4737 | 1.1 | 0.82 | 2500 | 24 | 2553 | 13 | 2596 | 13 | 2596 | 13 | 96  |
| SL19-1 | 41 | 404  | 101389 | 2.3  | 12.1859 | 1.0 | 2.2871  | 1.7 | 0.2022 | 1.4 | 0.81 | 1187 | 15 | 1208 | 12 | 1246 | 20 | 1246 | 20 | 95  |
| SL19-1 | 42 | 365  | 114138 | 1.9  | 13.5623 | 0.8 | 1.7302  | 2.0 | 0.1703 | 1.8 | 0.92 | 1014 | 17 | 1020 | 13 | 1033 | 16 | 1033 | 16 | 98  |
| SL19-1 | 43 | 154  | 224886 | 2.9  | 13.2541 | 0.8 | 1.8226  | 1.6 | 0.1753 | 1.4 | 0.85 | 1041 | 13 | 1054 | 10 | 1080 | 17 | 1080 | 17 | 96  |
| SL19-1 | 44 | 454  | 517672 | 5.9  | 13.6013 | 0.9 | 1.6845  | 1.4 | 0.1662 | 1.0 | 0.76 | 991  | 10 | 1003 | 9  | 1027 | 18 | 1027 | 18 | 96  |
| SL19-1 | 45 | 86   | 18308  | 3.0  | 12.8166 | 1.1 | 2.0732  | 1.5 | 0.1928 | 1.1 | 0.72 | 1137 | 11 | 1140 | 10 | 1147 | 21 | 1147 | 21 | 99  |
| SL19-1 | 46 | 430  | 172776 | 1.5  | 9.9369  | 0.8 | 3.9995  | 1.4 | 0.2884 | 1.2 | 0.84 | 1633 | 17 | 1634 | 12 | 1635 | 14 | 1635 | 14 | 100 |
| SL19-1 | 47 | 127  | 51912  | 4.0  | 14.0356 | 1.2 | 1.5139  | 1.6 | 0.1542 | 1.1 | 0.67 | 924  | 9  | 936  | 10 | 964  | 24 | 964  | 24 | 96  |
| SL19-1 | 48 | 191  | 83344  | 2.4  | 10.9887 | 0.7 | 2.8953  | 1.2 | 0.2308 | 1.0 | 0.84 | 1339 | 12 | 1381 | 9  | 1446 | 12 | 1446 | 12 | 93  |
| SL19-1 | 49 | 1138 | 775002 | 5.4  | 14.0612 | 0.8 | 1.5500  | 1.5 | 0.1581 | 1.2 | 0.83 | 946  | 11 | 950  | 9  | 960  | 17 | 960  | 17 | 99  |

|        |    |      |          |      |         |     |         |     |        |     |      |      |    |      |    |      |    |      |    |     |
|--------|----|------|----------|------|---------|-----|---------|-----|--------|-----|------|------|----|------|----|------|----|------|----|-----|
| SL19-1 | 50 | 73   | 40923    | 3.4  | 12.8806 | 1.1 | 2.0367  | 1.7 | 0.1904 | 1.3 | 0.77 | 1123 | 13 | 1128 | 11 | 1137 | 21 | 1137 | 21 | 99  |
| SL19-1 | 51 | 1113 | 97872    | 0.0  | 13.4573 | 0.6 | 1.4361  | 1.2 | 0.1402 | 1.1 | 0.88 | 846  | 8  | 904  | 7  | 1049 | 12 | 1049 | 12 | 81  |
| SL19-1 | 52 | 400  | 257218   | 11.6 | 13.3328 | 1.0 | 1.9124  | 1.5 | 0.1850 | 1.2 | 0.78 | 1094 | 12 | 1085 | 10 | 1068 | 19 | 1068 | 19 | 102 |
| SL19-1 | 53 | 139  | 115729   | 2.9  | 13.9062 | 0.8 | 1.5676  | 1.6 | 0.1582 | 1.4 | 0.88 | 947  | 12 | 957  | 10 | 983  | 16 | 983  | 16 | 96  |
| SL19-1 | 54 | 31   | 109850   | 2.6  | 11.3040 | 1.2 | 2.6842  | 1.8 | 0.2202 | 1.3 | 0.74 | 1283 | 15 | 1324 | 13 | 1392 | 23 | 1392 | 23 | 92  |
| SL19-1 | 55 | 485  | 229665   | 1.9  | 12.3539 | 1.0 | 2.3118  | 1.9 | 0.2072 | 1.6 | 0.86 | 1214 | 18 | 1216 | 14 | 1219 | 19 | 1219 | 19 | 100 |
| SL19-1 | 56 | 399  | 178630   | 2.5  | 13.5299 | 0.8 | 1.8102  | 1.5 | 0.1777 | 1.2 | 0.82 | 1054 | 12 | 1049 | 10 | 1038 | 17 | 1038 | 17 | 102 |
| SL19-1 | 57 | 152  | 43545    | 1.9  | 12.2046 | 0.8 | 2.4119  | 1.5 | 0.2136 | 1.3 | 0.85 | 1248 | 15 | 1246 | 11 | 1243 | 16 | 1243 | 16 | 100 |
| SL19-1 | 58 | 129  | 41898    | 3.2  | 12.7207 | 0.9 | 2.1098  | 1.6 | 0.1947 | 1.2 | 0.79 | 1147 | 13 | 1152 | 11 | 1161 | 19 | 1161 | 19 | 99  |
| SL19-1 | 59 | 154  | 52531    | 2.3  | 13.0059 | 0.9 | 2.0386  | 1.5 | 0.1924 | 1.2 | 0.79 | 1134 | 12 | 1128 | 10 | 1117 | 18 | 1117 | 18 | 102 |
| SL19-1 | 60 | 71   | 45199    | 1.9  | 13.2861 | 1.2 | 1.8427  | 1.8 | 0.1776 | 1.3 | 0.73 | 1054 | 13 | 1061 | 12 | 1075 | 25 | 1075 | 25 | 98  |
| SL19-1 | 61 | 456  | 109614   | 5.0  | 13.0298 | 0.9 | 1.9623  | 2.1 | 0.1855 | 1.9 | 0.91 | 1097 | 19 | 1103 | 14 | 1114 | 17 | 1114 | 17 | 98  |
| SL19-1 | 62 | 15   | 5648     | 3.6  | 13.3023 | 1.7 | 1.8096  | 2.2 | 0.1747 | 1.4 | 0.63 | 1038 | 13 | 1049 | 14 | 1072 | 34 | 1072 | 34 | 97  |
| SL19-1 | 63 | 410  | 89651    | 1.3  | 18.0479 | 1.1 | 0.5603  | 1.9 | 0.0734 | 1.6 | 0.81 | 456  | 7  | 452  | 7  | 428  | 25 | 456  | 7  | 107 |
| SL19-1 | 65 | 165  | 410921   | 1.8  | 16.6166 | 1.0 | 0.8239  | 1.5 | 0.0993 | 1.1 | 0.73 | 611  | 6  | 610  | 7  | 609  | 22 | 611  | 6  | 100 |
| SL19-1 | 66 | 404  | 97342    | 1.3  | 18.2847 | 1.2 | 0.4968  | 1.7 | 0.0659 | 1.3 | 0.74 | 411  | 5  | 410  | 6  | 399  | 26 | 411  | 5  | 103 |
| SL19-1 | 67 | 337  | 23761656 | 4.2  | 13.0727 | 1.1 | 1.9150  | 1.7 | 0.1816 | 1.3 | 0.77 | 1076 | 13 | 1086 | 11 | 1107 | 22 | 1107 | 22 | 97  |
| SL19-1 | 68 | 335  | 123202   | 1.6  | 18.0905 | 0.9 | 0.5475  | 1.8 | 0.0719 | 1.6 | 0.87 | 447  | 7  | 443  | 6  | 422  | 19 | 447  | 7  | 106 |
| SL19-1 | 69 | 296  | 843485   | 1.3  | 8.3200  | 1.0 | 5.8326  | 1.5 | 0.3521 | 1.2 | 0.78 | 1945 | 20 | 1951 | 13 | 1958 | 17 | 1958 | 17 | 99  |
| SL19-1 | 70 | 162  | 16493    | 0.9  | 17.8214 | 1.4 | 0.5270  | 1.9 | 0.0681 | 1.4 | 0.71 | 425  | 6  | 430  | 7  | 456  | 30 | 425  | 6  | 93  |
| SL19-1 | 71 | 277  | 95781    | 2.1  | 13.3958 | 0.8 | 1.8271  | 1.2 | 0.1776 | 0.9 | 0.74 | 1054 | 9  | 1055 | 8  | 1058 | 17 | 1058 | 17 | 100 |
| SL19-1 | 72 | 137  | 51679    | 0.7  | 11.4587 | 1.0 | 2.6196  | 1.7 | 0.2178 | 1.3 | 0.80 | 1270 | 16 | 1306 | 12 | 1366 | 20 | 1366 | 20 | 93  |
| SL19-1 | 73 | 424  | 149927   | 4.4  | 13.4039 | 0.8 | 1.7934  | 1.2 | 0.1744 | 1.0 | 0.79 | 1036 | 9  | 1043 | 8  | 1057 | 15 | 1057 | 15 | 98  |
| SL19-1 | 74 | 263  | 156073   | 1.9  | 10.6819 | 0.9 | 3.2134  | 1.2 | 0.2491 | 0.9 | 0.69 | 1434 | 11 | 1460 | 10 | 1500 | 17 | 1500 | 17 | 96  |
| SL19-1 | 75 | 149  | 181650   | 1.2  | 9.7564  | 0.9 | 4.1852  | 1.5 | 0.2963 | 1.2 | 0.79 | 1673 | 17 | 1671 | 12 | 1669 | 17 | 1669 | 17 | 100 |
| SL19-1 | 76 | 270  | 60593    | 4.3  | 12.5916 | 0.7 | 2.0781  | 1.2 | 0.1899 | 0.9 | 0.80 | 1121 | 10 | 1142 | 8  | 1182 | 14 | 1182 | 14 | 95  |
| SL19-1 | 77 | 346  | 98276    | 3.7  | 13.8113 | 0.9 | 1.7392  | 1.3 | 0.1743 | 0.9 | 0.74 | 1036 | 9  | 1023 | 8  | 996  | 18 | 996  | 18 | 104 |
| SL19-1 | 78 | 476  | 130739   | 2.5  | 11.3395 | 0.9 | 2.8289  | 1.7 | 0.2328 | 1.5 | 0.86 | 1349 | 18 | 1363 | 13 | 1386 | 17 | 1386 | 17 | 97  |
| SL19-1 | 79 | 527  | 118184   | 6.4  | 12.9940 | 0.8 | 2.0253  | 1.5 | 0.1910 | 1.3 | 0.86 | 1127 | 14 | 1124 | 10 | 1119 | 16 | 1119 | 16 | 101 |
| SL19-1 | 80 | 227  | 103212   | 2.2  | 5.5055  | 0.8 | 12.8968 | 1.2 | 0.5152 | 0.9 | 0.77 | 2679 | 20 | 2672 | 11 | 2667 | 13 | 2667 | 13 | 100 |
| SL19-1 | 81 | 149  | 176974   | 1.3  | 13.7443 | 0.9 | 1.6677  | 1.4 | 0.1663 | 1.0 | 0.77 | 992  | 10 | 996  | 9  | 1006 | 17 | 1006 | 17 | 99  |
| SL19-1 | 82 | 564  | 78732    | 3.1  | 13.5535 | 0.8 | 1.7468  | 1.3 | 0.1718 | 1.1 | 0.80 | 1022 | 10 | 1026 | 9  | 1035 | 17 | 1035 | 17 | 99  |
| SL19-1 | 83 | 89   | 16886    | 2.3  | 14.2295 | 1.0 | 1.3772  | 1.5 | 0.1422 | 1.1 | 0.73 | 857  | 9  | 879  | 9  | 936  | 21 | 857  | 9  | 92  |
| SL19-1 | 84 | 391  | 99624    | 2.8  | 9.1150  | 0.7 | 4.6692  | 1.4 | 0.3088 | 1.2 | 0.86 | 1735 | 18 | 1762 | 12 | 1794 | 13 | 1794 | 13 | 97  |
| SL19-1 | 85 | 157  | 24960    | 2.7  | 9.3638  | 0.8 | 4.5000  | 1.4 | 0.3057 | 1.1 | 0.83 | 1720 | 17 | 1731 | 11 | 1745 | 14 | 1745 | 14 | 99  |
| SL19-1 | 86 | 175  | 69273    | 2.9  | 13.0254 | 0.8 | 2.0286  | 1.4 | 0.1917 | 1.1 | 0.82 | 1131 | 12 | 1125 | 9  | 1114 | 15 | 1114 | 15 | 101 |
| SL19-1 | 87 | 250  | 35300    | 3.5  | 12.7305 | 1.0 | 2.0768  | 1.9 | 0.1918 | 1.6 | 0.84 | 1131 | 16 | 1141 | 13 | 1160 | 20 | 1160 | 20 | 98  |
| SL19-1 | 88 | 663  | 121266   | 3.0  | 12.6947 | 1.0 | 2.0775  | 2.0 | 0.1914 | 1.7 | 0.86 | 1129 | 17 | 1141 | 13 | 1166 | 20 | 1166 | 20 | 97  |
| SL19-1 | 89 | 232  | 1228527  | 2.7  | 10.6934 | 1.0 | 3.2494  | 1.8 | 0.2521 | 1.5 | 0.82 | 1449 | 19 | 1469 | 14 | 1498 | 19 | 1498 | 19 | 97  |
| SL19-1 | 91 | 50   | 17867    | 1.8  | 13.6253 | 1.3 | 1.6857  | 1.7 | 0.1667 | 1.1 | 0.65 | 994  | 10 | 1003 | 11 | 1024 | 26 | 1024 | 26 | 97  |
| SL19-1 | 92 | 380  | 2452547  | 1.4  | 9.2223  | 0.9 | 4.8192  | 1.4 | 0.3225 | 1.1 | 0.79 | 1802 | 18 | 1788 | 12 | 1772 | 16 | 1772 | 16 | 102 |
| SL19-1 | 93 | 255  | 424079   | 1.2  | 5.8586  | 0.7 | 11.5234 | 1.2 | 0.4898 | 1.0 | 0.83 | 2570 | 21 | 2566 | 11 | 2564 | 11 | 2564 | 11 | 100 |
| SL19-1 | 94 | 625  | 6078365  | 4.8  | 8.2455  | 1.0 | 5.9608  | 1.7 | 0.3566 | 1.4 | 0.81 | 1966 | 23 | 1970 | 15 | 1974 | 18 | 1974 | 18 | 100 |
| SL19-1 | 95 | 139  | 47615    | 2.2  | 12.3479 | 0.9 | 2.4192  | 1.5 | 0.2167 | 1.2 | 0.82 | 1265 | 14 | 1248 | 11 | 1220 | 17 | 1220 | 17 | 104 |
| SL19-1 | 96 | 56   | 24195    | 1.7  | 10.8109 | 1.0 | 3.3193  | 1.6 | 0.2604 | 1.2 | 0.76 | 1492 | 16 | 1486 | 12 | 1477 | 19 | 1477 | 19 | 101 |
| SL19-1 | 98 | 365  | 123974   | 4.0  | 13.2279 | 1.0 | 1.9876  | 1.9 | 0.1908 | 1.6 | 0.85 | 1126 | 17 | 1111 | 13 | 1084 | 20 | 1084 | 20 | 104 |

|        |     |      |         |      |         |     |         |     |        |     |      |      |    |      |    |      |    |      |    |     |
|--------|-----|------|---------|------|---------|-----|---------|-----|--------|-----|------|------|----|------|----|------|----|------|----|-----|
| SL19-1 | 99  | 69   | 16009   | 1.4  | 13.5109 | 1.4 | 1.8561  | 1.8 | 0.1820 | 1.1 | 0.63 | 1078 | 11 | 1066 | 12 | 1041 | 28 | 1041 | 28 | 104 |
| SL19-1 | 100 | 232  | 51320   | 3.2  | 12.4568 | 1.0 | 2.3007  | 1.4 | 0.2080 | 1.0 | 0.72 | 1218 | 11 | 1213 | 10 | 1203 | 19 | 1203 | 19 | 101 |
| SL19-1 | 101 | 733  | 156177  | 35.3 | 13.6121 | 0.8 | 1.7807  | 1.8 | 0.1759 | 1.6 | 0.89 | 1044 | 15 | 1038 | 12 | 1026 | 17 | 1026 | 17 | 102 |
| SL19-1 | 102 | 229  | 95117   | 3.9  | 12.7903 | 0.8 | 2.2000  | 1.2 | 0.2042 | 1.0 | 0.79 | 1198 | 11 | 1181 | 9  | 1151 | 15 | 1151 | 15 | 104 |
| SL19-1 | 103 | 391  | 679694  | 4.0  | 13.7875 | 0.6 | 1.7579  | 1.0 | 0.1759 | 0.9 | 0.84 | 1044 | 8  | 1030 | 7  | 1000 | 11 | 1000 | 11 | 104 |
| SL19-1 | 104 | 390  | 1139558 | 5.1  | 13.7123 | 0.9 | 1.7409  | 1.5 | 0.1732 | 1.2 | 0.78 | 1030 | 11 | 1024 | 10 | 1011 | 19 | 1011 | 19 | 102 |
| SL19-1 | 105 | 138  | 53370   | 2.1  | 13.5368 | 1.0 | 1.8711  | 1.7 | 0.1838 | 1.4 | 0.81 | 1088 | 14 | 1071 | 11 | 1037 | 20 | 1037 | 20 | 105 |
| SL19-1 | 106 | 244  | 245965  | 1.0  | 5.5085  | 0.8 | 12.6526 | 1.6 | 0.5057 | 1.4 | 0.86 | 2638 | 29 | 2654 | 15 | 2666 | 13 | 2666 | 13 | 99  |
| SL19-1 | 107 | 1352 | 51408   | 3.0  | 18.4579 | 0.9 | 0.4538  | 1.5 | 0.0608 | 1.2 | 0.82 | 380  | 5  | 380  | 5  | 377  | 19 | 380  | 5  | NA  |
| SL19-1 | 108 | 145  | 105017  | 3.3  | 14.0861 | 1.1 | 1.6183  | 1.6 | 0.1654 | 1.1 | 0.72 | 987  | 10 | 977  | 10 | 956  | 22 | 956  | 22 | 103 |
| SL19-1 | 109 | 123  | 130751  | 1.0  | 8.5166  | 0.9 | 5.6391  | 1.2 | 0.3485 | 0.9 | 0.72 | 1927 | 15 | 1922 | 11 | 1916 | 16 | 1916 | 16 | 101 |
| SL19-1 | 110 | 261  | 105249  | 1.9  | 13.6118 | 0.8 | 1.8092  | 1.3 | 0.1787 | 1.1 | 0.82 | 1060 | 11 | 1049 | 9  | 1026 | 15 | 1026 | 15 | 103 |
| SL19-1 | 111 | 507  | 485338  | 1.9  | 11.5864 | 0.8 | 2.6874  | 1.9 | 0.2259 | 1.7 | 0.90 | 1313 | 20 | 1325 | 14 | 1344 | 16 | 1344 | 16 | 98  |
| SL19-1 | 112 | 165  | 557038  | 0.6  | 5.3962  | 0.9 | 13.2635 | 1.8 | 0.5193 | 1.5 | 0.85 | 2696 | 33 | 2699 | 17 | 2700 | 15 | 2700 | 15 | 100 |
| SL19-1 | 113 | 636  | 162017  | 36.1 | 13.3942 | 0.7 | 1.8766  | 1.5 | 0.1824 | 1.3 | 0.87 | 1080 | 13 | 1073 | 10 | 1058 | 14 | 1058 | 14 | 102 |
| SL19-1 | 114 | 263  | 1334982 | 3.8  | 12.7504 | 0.8 | 2.1319  | 1.8 | 0.1972 | 1.6 | 0.88 | 1160 | 17 | 1159 | 12 | 1157 | 17 | 1157 | 17 | 100 |
| SL19-1 | 115 | 133  | 41421   | 3.0  | 12.9238 | 0.9 | 2.1281  | 1.9 | 0.1996 | 1.7 | 0.87 | 1173 | 18 | 1158 | 13 | 1130 | 19 | 1130 | 19 | 104 |
| SL19-1 | 116 | 82   | 54498   | 2.8  | 12.6520 | 1.4 | 2.1646  | 2.3 | 0.1987 | 1.9 | 0.80 | 1168 | 20 | 1170 | 16 | 1172 | 27 | 1172 | 27 | 100 |
| SL19-1 | 117 | 529  | 315876  | 3.8  | 11.0613 | 0.8 | 2.8774  | 1.4 | 0.2309 | 1.1 | 0.80 | 1339 | 13 | 1376 | 10 | 1433 | 16 | 1433 | 16 | 93  |
| SL19-1 | 118 | 280  | 373928  | 3.2  | 6.1705  | 1.0 | 9.9354  | 2.1 | 0.4448 | 1.8 | 0.87 | 2372 | 36 | 2429 | 19 | 2477 | 17 | 2477 | 17 | 96  |
| SL19-1 | 119 | 159  | 91007   | 5.6  | 11.3172 | 1.1 | 2.9540  | 2.0 | 0.2426 | 1.6 | 0.81 | 1400 | 20 | 1396 | 15 | 1389 | 22 | 1389 | 22 | 101 |
| SL19-1 | 120 | 59   | 84131   | 0.9  | 5.3397  | 0.7 | 13.0972 | 1.6 | 0.5074 | 1.5 | 0.91 | 2646 | 32 | 2687 | 15 | 2718 | 11 | 2718 | 11 | 97  |
| SL19-1 | 121 | 1326 | 113361  | 6.2  | 13.2836 | 0.8 | 1.8154  | 1.4 | 0.1750 | 1.1 | 0.81 | 1039 | 11 | 1051 | 9  | 1075 | 16 | 1075 | 16 | 97  |
| SL19-1 | 122 | 203  | 522420  | 2.2  | 5.0708  | 0.7 | 14.6470 | 1.5 | 0.5389 | 1.3 | 0.88 | 2779 | 29 | 2793 | 14 | 2802 | 11 | 2802 | 11 | 99  |
| SL19-1 | 123 | 337  | 159207  | 2.4  | 9.9548  | 0.7 | 3.9451  | 1.5 | 0.2850 | 1.4 | 0.87 | 1616 | 19 | 1623 | 13 | 1632 | 14 | 1632 | 14 | 99  |
| SL19-1 | 124 | 416  | 242183  | 2.6  | 12.7545 | 0.6 | 2.1680  | 1.1 | 0.2006 | 0.9 | 0.86 | 1179 | 10 | 1171 | 7  | 1156 | 11 | 1156 | 11 | 102 |
| SL19-1 | 125 | 132  | 268473  | 2.9  | 13.6655 | 1.0 | 1.7595  | 1.6 | 0.1745 | 1.2 | 0.74 | 1037 | 11 | 1031 | 10 | 1018 | 21 | 1018 | 21 | 102 |
| SL19-1 | 126 | 25   | 112851  | 1.5  | 13.3420 | 1.7 | 1.7872  | 2.2 | 0.1730 | 1.4 | 0.63 | 1029 | 13 | 1041 | 14 | 1066 | 35 | 1066 | 35 | 96  |
| SL19-1 | 127 | 262  | 280470  | 2.2  | 10.8052 | 0.8 | 3.2544  | 1.5 | 0.2552 | 1.3 | 0.84 | 1465 | 17 | 1470 | 12 | 1478 | 16 | 1478 | 16 | 99  |
| SL19-1 | 128 | 738  | 351843  | 5.0  | 9.1214  | 0.9 | 4.8098  | 1.6 | 0.3183 | 1.3 | 0.84 | 1782 | 21 | 1787 | 13 | 1793 | 16 | 1793 | 16 | 99  |
| SL19-1 | 129 | 581  | 110082  | 2.5  | 12.6444 | 0.8 | 2.1615  | 1.5 | 0.1983 | 1.3 | 0.87 | 1166 | 14 | 1169 | 11 | 1173 | 15 | 1173 | 15 | 99  |
| SL19-1 | 130 | 262  | 98237   | 2.6  | 11.6990 | 0.8 | 2.6171  | 1.6 | 0.2222 | 1.4 | 0.87 | 1293 | 17 | 1305 | 12 | 1326 | 15 | 1326 | 15 | 98  |
| SL19-1 | 131 | 1140 | 153564  | 5.1  | 13.4068 | 0.8 | 1.7640  | 1.5 | 0.1716 | 1.2 | 0.83 | 1021 | 11 | 1032 | 9  | 1057 | 17 | 1057 | 17 | 97  |
| SL19-1 | 132 | 50   | 8499    | 2.2  | 13.4200 | 1.4 | 1.7537  | 1.9 | 0.1708 | 1.4 | 0.71 | 1016 | 13 | 1029 | 13 | 1055 | 28 | 1055 | 28 | 96  |
| SL19-1 | 133 | 375  | 97358   | 3.5  | 12.6859 | 1.0 | 2.1318  | 1.9 | 0.1962 | 1.6 | 0.84 | 1155 | 17 | 1159 | 13 | 1167 | 20 | 1167 | 20 | 99  |
| SL19-1 | 134 | 351  | 40998   | 1.3  | 13.4485 | 0.9 | 1.7854  | 1.6 | 0.1742 | 1.3 | 0.83 | 1035 | 13 | 1040 | 10 | 1050 | 18 | 1050 | 18 | 99  |
| SL19-1 | 135 | 458  | 262309  | 4.6  | 12.1961 | 1.1 | 2.3857  | 1.9 | 0.2111 | 1.5 | 0.81 | 1235 | 17 | 1238 | 13 | 1244 | 21 | 1244 | 21 | 99  |
| SL19-1 | 136 | 168  | 53988   | 2.8  | 11.1647 | 1.0 | 3.0125  | 1.7 | 0.2440 | 1.4 | 0.83 | 1408 | 18 | 1411 | 13 | 1415 | 18 | 1415 | 18 | 99  |
| SL19-1 | 137 | 321  | 1334300 | 2.4  | 13.4993 | 1.0 | 1.8107  | 1.5 | 0.1774 | 1.1 | 0.75 | 1053 | 11 | 1049 | 10 | 1043 | 20 | 1043 | 20 | 101 |
| SL19-1 | 138 | 413  | 113986  | 3.8  | 12.3689 | 0.8 | 2.3190  | 1.6 | 0.2081 | 1.4 | 0.87 | 1219 | 16 | 1218 | 11 | 1217 | 16 | 1217 | 16 | 100 |
| SL19-1 | 139 | 277  | 117646  | 2.2  | 13.2545 | 0.9 | 1.9303  | 1.4 | 0.1856 | 1.1 | 0.77 | 1098 | 11 | 1092 | 9  | 1080 | 18 | 1080 | 18 | 102 |
| SL19-1 | 140 | 606  | 29489   | 3.4  | 18.0781 | 1.1 | 0.5078  | 1.8 | 0.0666 | 1.4 | 0.79 | 416  | 6  | 417  | 6  | 424  | 24 | 416  | 6  | 98  |
| SL19-1 | 141 | 52   | 30785   | 2.9  | 12.6936 | 0.9 | 2.0417  | 1.5 | 0.1880 | 1.1 | 0.78 | 1111 | 12 | 1130 | 10 | 1166 | 18 | 1166 | 18 | 95  |
| SL19-1 | 142 | 381  | 1304903 | 1.7  | 9.8723  | 0.6 | 4.0692  | 1.4 | 0.2915 | 1.3 | 0.90 | 1649 | 19 | 1648 | 12 | 1647 | 12 | 1647 | 12 | 100 |
| SL19-1 | 143 | 224  | 178690  | 0.9  | 9.7410  | 0.9 | 4.0514  | 1.4 | 0.2863 | 1.1 | 0.79 | 1623 | 16 | 1645 | 11 | 1672 | 16 | 1672 | 16 | 97  |
| SL19-1 | 144 | 139  | 33564   | 1.6  | 10.7396 | 1.0 | 3.2064  | 1.5 | 0.2499 | 1.1 | 0.75 | 1438 | 14 | 1459 | 11 | 1489 | 19 | 1489 | 19 | 97  |

|        |     |      |         |      |         |     |         |     |        |     |      |      |    |      |    |      |    |      |    |     |
|--------|-----|------|---------|------|---------|-----|---------|-----|--------|-----|------|------|----|------|----|------|----|------|----|-----|
| SL19-1 | 145 | 62   | 13426   | 5.4  | 13.5818 | 1.1 | 1.7712  | 1.5 | 0.1746 | 1.1 | 0.71 | 1037 | 10 | 1035 | 10 | 1030 | 22 | 1030 | 22 | 101 |
| SL19-1 | 146 | 672  | 101007  | 4.2  | 13.1837 | 0.7 | 1.9785  | 1.5 | 0.1893 | 1.4 | 0.90 | 1117 | 14 | 1108 | 10 | 1090 | 13 | 1090 | 13 | 102 |
| SL19-1 | 148 | 378  | 100792  | 3.7  | 13.5447 | 0.8 | 1.8109  | 1.7 | 0.1780 | 1.5 | 0.89 | 1056 | 15 | 1049 | 11 | 1036 | 15 | 1036 | 15 | 102 |
| SL19-1 | 149 | 245  | 28041   | 2.9  | 12.8045 | 0.9 | 2.0478  | 1.8 | 0.1903 | 1.6 | 0.87 | 1123 | 17 | 1132 | 13 | 1148 | 18 | 1148 | 18 | 98  |
| SL19-1 | 150 | 89   | 850519  | 2.3  | 13.3399 | 0.7 | 1.7397  | 1.7 | 0.1684 | 1.5 | 0.90 | 1003 | 14 | 1023 | 11 | 1067 | 15 | 1067 | 15 | 94  |
| SL19-1 | 151 | 165  | 248168  | 1.8  | 8.5162  | 0.7 | 5.4638  | 1.2 | 0.3376 | 1.1 | 0.85 | 1875 | 17 | 1895 | 11 | 1917 | 12 | 1917 | 12 | 98  |
| SL19-1 | 152 | 99   | 64245   | 2.5  | 13.4093 | 0.9 | 1.8020  | 1.6 | 0.1753 | 1.4 | 0.84 | 1041 | 13 | 1046 | 11 | 1056 | 18 | 1056 | 18 | 99  |
| SL19-1 | 153 | 216  | 116042  | 0.8  | 10.5904 | 0.7 | 3.3093  | 1.4 | 0.2543 | 1.2 | 0.85 | 1461 | 16 | 1483 | 11 | 1516 | 14 | 1516 | 14 | 96  |
| SL19-1 | 154 | 227  | 39135   | 1.9  | 13.2807 | 0.7 | 1.8113  | 1.4 | 0.1745 | 1.2 | 0.87 | 1037 | 11 | 1050 | 9  | 1076 | 13 | 1076 | 13 | 96  |
| SL19-1 | 155 | 204  | 211781  | 1.5  | 8.9182  | 0.8 | 4.9565  | 1.6 | 0.3207 | 1.4 | 0.88 | 1793 | 22 | 1812 | 13 | 1833 | 14 | 1833 | 14 | 98  |
| SL19-1 | 156 | 370  | 107827  | 2.8  | 13.5718 | 0.7 | 1.7575  | 1.5 | 0.1731 | 1.3 | 0.86 | 1029 | 12 | 1030 | 10 | 1032 | 15 | 1032 | 15 | 100 |
| SL19-1 | 157 | 64   | 32318   | 1.8  | 4.8973  | 0.8 | 15.1757 | 1.5 | 0.5393 | 1.2 | 0.82 | 2780 | 27 | 2826 | 14 | 2859 | 14 | 2859 | 14 | 97  |
| SL19-1 | 158 | 1020 | 10812   | 0.0  | 14.2314 | 3.4 | 0.4878  | 3.6 | 0.0504 | 1.2 | 0.34 | 317  | 4  | 403  | 12 | 935  | 69 | 317  | 4  | NA  |
| SL19-1 | 159 | 68   | 9424    | 3.2  | 13.4971 | 1.2 | 1.7090  | 1.9 | 0.1674 | 1.5 | 0.77 | 998  | 14 | 1012 | 12 | 1043 | 25 | 1043 | 25 | 96  |
| SL19-1 | 160 | 110  | 431856  | 1.1  | 13.4022 | 0.9 | 1.7835  | 1.7 | 0.1734 | 1.4 | 0.84 | 1031 | 14 | 1039 | 11 | 1057 | 19 | 1057 | 19 | 98  |
| SL19-1 | 161 | 74   | 108341  | 0.9  | 12.7400 | 1.2 | 2.0924  | 2.1 | 0.1934 | 1.8 | 0.82 | 1140 | 18 | 1146 | 15 | 1159 | 25 | 1159 | 25 | 98  |
| SL19-1 | 162 | 207  | 98533   | 1.3  | 13.5471 | 0.7 | 1.7566  | 1.4 | 0.1727 | 1.3 | 0.88 | 1027 | 12 | 1030 | 9  | 1036 | 14 | 1036 | 14 | 99  |
| SL19-1 | 163 | 413  | 241398  | 2.6  | 11.5572 | 0.7 | 2.6810  | 1.4 | 0.2248 | 1.2 | 0.84 | 1307 | 14 | 1323 | 10 | 1349 | 14 | 1349 | 14 | 97  |
| SL19-1 | 164 | 388  | 25143   | 2.7  | 11.7474 | 1.2 | 2.3520  | 1.8 | 0.2005 | 1.3 | 0.71 | 1178 | 13 | 1228 | 12 | 1318 | 24 | 1318 | 24 | 89  |
| SL19-1 | 165 | 298  | 103995  | 1.7  | 5.1406  | 0.9 | 13.8691 | 1.5 | 0.5173 | 1.2 | 0.79 | 2688 | 25 | 2741 | 14 | 2780 | 15 | 2780 | 15 | 97  |
| SL19-1 | 166 | 217  | 12591   | 2.2  | 17.6366 | 1.5 | 0.5759  | 1.8 | 0.0737 | 1.0 | 0.55 | 458  | 4  | 462  | 7  | 479  | 34 | 458  | 4  | 96  |
| SL19-1 | 167 | 38   | 11952   | 0.6  | 13.0632 | 1.3 | 1.9470  | 1.8 | 0.1845 | 1.4 | 0.73 | 1092 | 14 | 1097 | 12 | 1109 | 25 | 1109 | 25 | 98  |
| SL19-1 | 168 | 62   | 13386   | 1.7  | 13.8929 | 1.0 | 1.5901  | 1.6 | 0.1603 | 1.2 | 0.76 | 958  | 11 | 966  | 10 | 984  | 21 | 984  | 21 | 97  |
| SL19-1 | 169 | 314  | 47359   | 2.3  | 11.1998 | 0.8 | 2.9033  | 1.3 | 0.2359 | 1.1 | 0.83 | 1366 | 14 | 1383 | 10 | 1409 | 14 | 1409 | 14 | 97  |
| SL19-1 | 170 | 16   | 2444    | 0.8  | 14.6629 | 2.1 | 1.4158  | 2.6 | 0.1506 | 1.4 | 0.56 | 905  | 12 | 896  | 15 | 874  | 44 | 905  | 12 | 104 |
| SL19-1 | 171 | 275  | 193759  | 1.7  | 8.5379  | 0.7 | 5.2317  | 1.3 | 0.3241 | 1.1 | 0.84 | 1810 | 17 | 1858 | 11 | 1912 | 12 | 1912 | 12 | 95  |
| SL19-1 | 172 | 518  | 66033   | 2.7  | 11.1335 | 0.8 | 1.2808  | 1.7 | 0.1035 | 1.5 | 0.88 | 635  | 9  | 837  | 10 | 1421 | 16 | 1421 | 16 | 45  |
| SL19-1 | 173 | 723  | 237480  | 0.6  | 13.4655 | 0.8 | 1.7881  | 1.6 | 0.1747 | 1.4 | 0.86 | 1038 | 13 | 1041 | 10 | 1048 | 17 | 1048 | 17 | 99  |
| SL19-1 | 174 | 60   | 209721  | 1.7  | 12.0979 | 1.2 | 2.4069  | 1.5 | 0.2113 | 0.9 | 0.60 | 1236 | 10 | 1245 | 11 | 1260 | 23 | 1260 | 23 | 98  |
| SL19-1 | 175 | 324  | 148368  | 4.1  | 13.1970 | 0.9 | 1.8851  | 1.6 | 0.1805 | 1.3 | 0.82 | 1070 | 13 | 1076 | 11 | 1088 | 19 | 1088 | 19 | 98  |
| SL19-1 | 176 | 90   | 36848   | 18.3 | 9.7443  | 0.9 | 4.3039  | 1.8 | 0.3043 | 1.6 | 0.87 | 1713 | 24 | 1694 | 15 | 1671 | 16 | 1671 | 16 | 102 |
| SL19-1 | 177 | 840  | 1464124 | 7.2  | 10.9773 | 0.9 | 2.9790  | 1.5 | 0.2373 | 1.2 | 0.80 | 1373 | 15 | 1402 | 11 | 1448 | 17 | 1448 | 17 | 95  |
| SL19-1 | 178 | 28   | 43817   | 1.3  | 5.0213  | 1.1 | 15.6324 | 2.4 | 0.5696 | 2.1 | 0.89 | 2906 | 49 | 2855 | 22 | 2819 | 17 | 2819 | 17 | 103 |
| SL19-1 | 179 | 88   | 49819   | 1.6  | 12.4706 | 0.8 | 2.1252  | 1.4 | 0.1923 | 1.2 | 0.81 | 1134 | 12 | 1157 | 10 | 1201 | 17 | 1201 | 17 | 94  |
| SL19-1 | 180 | 202  | 118157  | 3.2  | 8.9617  | 1.0 | 4.9748  | 1.9 | 0.3235 | 1.6 | 0.86 | 1807 | 25 | 1815 | 16 | 1825 | 17 | 1825 | 17 | 99  |
| SL19-1 | 181 | 602  | 155413  | 10.3 | 12.9404 | 1.0 | 1.9935  | 1.9 | 0.1872 | 1.6 | 0.84 | 1106 | 16 | 1113 | 13 | 1127 | 20 | 1127 | 20 | 98  |
| SL19-1 | 182 | 133  | 11337   | 1.6  | 18.2164 | 1.6 | 0.4929  | 2.6 | 0.0651 | 2.0 | 0.78 | 407  | 8  | 407  | 9  | 407  | 36 | 407  | 8  | 100 |
| SL19-1 | 183 | 130  | 95202   | 2.9  | 12.9615 | 0.8 | 1.9812  | 1.8 | 0.1863 | 1.6 | 0.90 | 1101 | 16 | 1109 | 12 | 1124 | 16 | 1124 | 16 | 98  |
| SL19-1 | 184 | 123  | 165177  | 0.9  | 10.2984 | 1.2 | 3.3847  | 2.0 | 0.2529 | 1.7 | 0.81 | 1454 | 22 | 1501 | 16 | 1568 | 23 | 1568 | 23 | 93  |
| SL19-1 | 185 | 72   | 55281   | 1.7  | 9.8414  | 1.3 | 3.9716  | 2.1 | 0.2836 | 1.6 | 0.77 | 1609 | 23 | 1628 | 17 | 1653 | 24 | 1653 | 24 | 97  |
| SL19-1 | 186 | 2299 | 59638   | 9.8  | 12.5822 | 0.7 | 1.1455  | 1.8 | 0.1046 | 1.6 | 0.91 | 641  | 10 | 775  | 10 | 1183 | 15 | 1183 | 15 | 54  |
| SL19-1 | 187 | 51   | 10184   | 1.1  | 12.5343 | 1.3 | 2.2332  | 1.9 | 0.2031 | 1.4 | 0.74 | 1192 | 15 | 1192 | 13 | 1191 | 25 | 1191 | 25 | 100 |
| SL19-1 | 188 | 354  | 133445  | 4.8  | 13.5825 | 0.6 | 1.7851  | 1.6 | 0.1759 | 1.5 | 0.93 | 1045 | 14 | 1040 | 10 | 1030 | 12 | 1030 | 12 | 101 |
| SL19-1 | 189 | 396  | 147692  | 2.9  | 9.0257  | 0.7 | 4.8754  | 1.3 | 0.3193 | 1.1 | 0.82 | 1786 | 17 | 1798 | 11 | 1812 | 14 | 1812 | 14 | 99  |
| SL19-1 | 190 | 83   | 24986   | 1.4  | 12.5550 | 1.0 | 2.1545  | 1.6 | 0.1963 | 1.2 | 0.74 | 1155 | 12 | 1166 | 11 | 1187 | 21 | 1187 | 21 | 97  |
| SL19-1 | 191 | 85   | 512375  | 3.2  | 10.6393 | 0.8 | 3.2547  | 1.5 | 0.2513 | 1.2 | 0.83 | 1445 | 16 | 1470 | 12 | 1507 | 16 | 1507 | 16 | 96  |



|        |     |      |         |      |         |     |         |     |        |     |      |      |    |      |    |      |    |      |    |     |
|--------|-----|------|---------|------|---------|-----|---------|-----|--------|-----|------|------|----|------|----|------|----|------|----|-----|
| SL19-1 | 192 | 64   | 49031   | 3.0  | 10.6279 | 1.1 | 3.2818  | 1.6 | 0.2531 | 1.2 | 0.74 | 1454 | 16 | 1477 | 13 | 1509 | 21 | 1509 | 21 | 96  |
| SL19-1 | 193 | 42   | 16687   | 1.0  | 13.1673 | 1.2 | 1.8156  | 1.7 | 0.1735 | 1.2 | 0.70 | 1031 | 11 | 1051 | 11 | 1093 | 25 | 1093 | 25 | 94  |
| SL19-1 | 194 | 240  | 194764  | 1.4  | 13.3321 | 1.0 | 1.7929  | 1.6 | 0.1734 | 1.3 | 0.80 | 1031 | 12 | 1043 | 11 | 1068 | 20 | 1068 | 20 | 97  |
| SL19-1 | 195 | 249  | 96047   | 2.4  | 9.3067  | 0.9 | 4.6439  | 1.6 | 0.3136 | 1.4 | 0.83 | 1758 | 21 | 1757 | 14 | 1756 | 17 | 1756 | 17 | 100 |
| SL19-1 | 196 | 185  | 59417   | 1.3  | 9.0476  | 1.0 | 4.7719  | 1.6 | 0.3133 | 1.3 | 0.80 | 1757 | 20 | 1780 | 14 | 1807 | 18 | 1807 | 18 | 97  |
| SL19-1 | 197 | 210  | 998361  | 3.2  | 9.7789  | 0.9 | 4.0380  | 1.5 | 0.2865 | 1.2 | 0.81 | 1624 | 18 | 1642 | 12 | 1665 | 17 | 1665 | 17 | 98  |
| SL19-1 | 198 | 119  | 22495   | 2.0  | 18.3281 | 1.4 | 0.5068  | 2.0 | 0.0674 | 1.5 | 0.72 | 420  | 6  | 416  | 7  | 393  | 32 | 420  | 6  | 107 |
| SL19-1 | 199 | 165  | 121399  | 1.3  | 5.1874  | 0.9 | 13.6753 | 1.5 | 0.5147 | 1.2 | 0.82 | 2677 | 27 | 2727 | 14 | 2765 | 14 | 2765 | 14 | 97  |
| SL19-1 | 200 | 194  | 16921   | 2.4  | 12.6755 | 2.2 | 1.8925  | 2.5 | 0.1741 | 1.3 | 0.50 | 1034 | 12 | 1078 | 17 | 1169 | 43 | 1169 | 43 | 89  |
| SL19-1 | 201 | 329  | 80027   | 4.0  | 12.5675 | 0.7 | 2.1443  | 1.5 | 0.1955 | 1.3 | 0.87 | 1151 | 14 | 1163 | 11 | 1186 | 15 | 1186 | 15 | 97  |
| SL19-1 | 202 | 201  | 323387  | 3.8  | 13.5837 | 0.9 | 1.7830  | 1.3 | 0.1757 | 0.9 | 0.70 | 1044 | 9  | 1039 | 8  | 1030 | 18 | 1030 | 18 | 101 |
| SL19-1 | 203 | 422  | 204357  | 3.0  | 12.2603 | 0.7 | 2.3185  | 1.4 | 0.2062 | 1.2 | 0.87 | 1209 | 13 | 1218 | 10 | 1234 | 13 | 1234 | 13 | 98  |
| SL19-1 | 204 | 585  | 64813   | 2.8  | 8.6277  | 1.1 | 5.3210  | 2.2 | 0.3331 | 1.9 | 0.87 | 1853 | 31 | 1872 | 19 | 1893 | 19 | 1893 | 19 | 98  |
| SL19-1 | 205 | 173  | 338134  | 1.6  | 9.8012  | 0.9 | 3.9074  | 1.7 | 0.2779 | 1.4 | 0.84 | 1581 | 19 | 1615 | 13 | 1661 | 17 | 1661 | 17 | 95  |
| SL19-1 | 206 | 30   | 6250    | 1.9  | 12.7773 | 1.6 | 2.1421  | 2.1 | 0.1986 | 1.4 | 0.67 | 1168 | 15 | 1162 | 15 | 1153 | 31 | 1153 | 31 | 101 |
| SL19-1 | 207 | 126  | 74770   | 1.5  | 5.2125  | 0.6 | 14.1795 | 1.0 | 0.5363 | 0.8 | 0.78 | 2768 | 17 | 2762 | 9  | 2757 | 10 | 2757 | 10 | 100 |
| SL19-1 | 208 | 145  | 35550   | 2.0  | 10.9644 | 1.1 | 2.8629  | 1.5 | 0.2278 | 1.0 | 0.70 | 1323 | 12 | 1372 | 11 | 1450 | 21 | 1450 | 21 | 91  |
| SL19-1 | 209 | 153  | 61366   | 1.3  | 17.3607 | 1.3 | 0.6098  | 1.9 | 0.0768 | 1.4 | 0.74 | 477  | 6  | 483  | 7  | 514  | 28 | 477  | 6  | 93  |
| SL19-1 | 210 | 66   | 8163    | 1.2  | 13.5183 | 1.4 | 1.7152  | 1.9 | 0.1682 | 1.3 | 0.69 | 1002 | 12 | 1014 | 12 | 1040 | 28 | 1040 | 28 | 96  |
| SL19-1 | 211 | 262  | 300494  | 3.2  | 12.8794 | 1.0 | 2.0722  | 1.8 | 0.1937 | 1.5 | 0.83 | 1141 | 16 | 1140 | 12 | 1137 | 20 | 1137 | 20 | 100 |
| SL19-1 | 212 | 1014 | 296428  | 14.9 | 9.8039  | 0.9 | 3.9560  | 1.5 | 0.2814 | 1.2 | 0.81 | 1598 | 17 | 1625 | 12 | 1660 | 16 | 1660 | 16 | 96  |
| SL19-1 | 213 | 250  | 88363   | 1.4  | 11.5064 | 0.9 | 2.7435  | 1.5 | 0.2291 | 1.2 | 0.80 | 1330 | 14 | 1340 | 11 | 1358 | 17 | 1358 | 17 | 98  |
| SL19-1 | 214 | 262  | 53632   | 1.3  | 13.2250 | 0.8 | 1.8849  | 1.7 | 0.1809 | 1.4 | 0.87 | 1072 | 14 | 1076 | 11 | 1084 | 16 | 1084 | 16 | 99  |
| SL19-1 | 215 | 181  | 57206   | 2.5  | 13.5974 | 0.9 | 1.7418  | 1.4 | 0.1718 | 1.1 | 0.77 | 1022 | 10 | 1024 | 9  | 1028 | 18 | 1028 | 18 | 99  |
| SL19-1 | 216 | 138  | 24349   | 3.8  | 12.6019 | 1.0 | 2.0942  | 1.6 | 0.1915 | 1.3 | 0.80 | 1129 | 13 | 1147 | 11 | 1180 | 19 | 1180 | 19 | 96  |
| SL19-1 | 217 | 99   | 20887   | 2.9  | 12.7227 | 0.9 | 2.1502  | 1.6 | 0.1985 | 1.3 | 0.83 | 1167 | 14 | 1165 | 11 | 1161 | 18 | 1161 | 18 | 101 |
| SL19-1 | 218 | 380  | 49132   | 9.7  | 12.6530 | 0.7 | 2.1897  | 1.3 | 0.2010 | 1.1 | 0.83 | 1181 | 11 | 1178 | 9  | 1172 | 14 | 1172 | 14 | 101 |
| SL19-1 | 219 | 64   | 20962   | 1.0  | 13.2366 | 1.1 | 1.7813  | 1.5 | 0.1711 | 1.1 | 0.72 | 1018 | 10 | 1039 | 10 | 1082 | 21 | 1082 | 21 | 94  |
| SL19-1 | 221 | 214  | 74815   | 4.0  | 12.4513 | 0.9 | 2.3140  | 1.5 | 0.2091 | 1.2 | 0.80 | 1224 | 13 | 1217 | 11 | 1204 | 18 | 1204 | 18 | 102 |
| SL19-1 | 222 | 701  | 138445  | 2.4  | 13.3607 | 0.6 | 1.9009  | 1.4 | 0.1843 | 1.3 | 0.92 | 1090 | 13 | 1081 | 9  | 1064 | 11 | 1064 | 11 | 103 |
| SL19-1 | 223 | 314  | 591475  | 1.8  | 10.8262 | 0.7 | 3.2192  | 1.2 | 0.2529 | 1.0 | 0.80 | 1453 | 13 | 1462 | 9  | 1474 | 14 | 1474 | 14 | 99  |
| SL19-1 | 224 | 127  | 34141   | 3.0  | 13.7784 | 1.0 | 1.6337  | 1.4 | 0.1633 | 1.0 | 0.68 | 975  | 9  | 983  | 9  | 1001 | 21 | 1001 | 21 | 97  |
| SL19-1 | 225 | 64   | 21228   | 1.7  | 18.1641 | 2.0 | 0.5355  | 2.2 | 0.0706 | 1.0 | 0.46 | 440  | 4  | 435  | 8  | 413  | 44 | 440  | 4  | 106 |
| SL19-1 | 226 | 157  | 80098   | 1.0  | 9.9171  | 0.7 | 4.0731  | 1.5 | 0.2931 | 1.4 | 0.89 | 1657 | 20 | 1649 | 12 | 1639 | 13 | 1639 | 13 | 101 |
| SL19-1 | 227 | 406  | 220007  | 7.4  | 12.6765 | 0.8 | 2.0793  | 1.2 | 0.1912 | 0.9 | 0.74 | 1128 | 9  | 1142 | 8  | 1168 | 16 | 1168 | 16 | 97  |
| SL19-1 | 228 | 187  | 191184  | 3.4  | 13.8506 | 0.8 | 1.6430  | 1.7 | 0.1651 | 1.5 | 0.88 | 985  | 13 | 987  | 11 | 991  | 16 | 991  | 16 | 99  |
| SL19-1 | 229 | 238  | 66801   | 2.9  | 11.5131 | 0.8 | 2.7506  | 1.3 | 0.2298 | 1.0 | 0.78 | 1333 | 12 | 1342 | 9  | 1356 | 15 | 1356 | 15 | 98  |
| SL19-1 | 230 | 132  | 217617  | 1.3  | 13.3274 | 0.8 | 1.8597  | 1.5 | 0.1798 | 1.3 | 0.84 | 1066 | 13 | 1067 | 10 | 1069 | 17 | 1069 | 17 | 100 |
| SL19-1 | 232 | 594  | 503503  | 4.7  | 13.6380 | 0.8 | 1.8021  | 1.7 | 0.1783 | 1.5 | 0.89 | 1058 | 15 | 1046 | 11 | 1022 | 15 | 1022 | 15 | 104 |
| SL19-1 | 233 | 123  | 175001  | 2.1  | 12.9901 | 1.1 | 1.9841  | 1.5 | 0.1870 | 1.0 | 0.70 | 1105 | 11 | 1110 | 10 | 1120 | 21 | 1120 | 21 | 99  |
| SL19-1 | 234 | 94   | 64867   | 2.0  | 12.9122 | 1.1 | 2.0633  | 1.7 | 0.1933 | 1.3 | 0.79 | 1139 | 14 | 1137 | 12 | 1132 | 21 | 1132 | 21 | 101 |
| SL19-1 | 235 | 331  | 254993  | 4.0  | 13.3716 | 0.8 | 1.8437  | 1.6 | 0.1789 | 1.4 | 0.85 | 1061 | 13 | 1061 | 11 | 1062 | 17 | 1062 | 17 | 100 |
| SL19-1 | 236 | 323  | 1023522 | 1.5  | 12.9261 | 0.8 | 2.0707  | 1.6 | 0.1942 | 1.4 | 0.88 | 1144 | 15 | 1139 | 11 | 1130 | 15 | 1130 | 15 | 101 |
| SL19-1 | 237 | 49   | 61399   | 3.3  | 13.1667 | 1.3 | 1.8606  | 1.8 | 0.1777 | 1.3 | 0.69 | 1055 | 12 | 1067 | 12 | 1093 | 26 | 1093 | 26 | 97  |
| SL19-1 | 238 | 102  | 13351   | 1.9  | 13.2418 | 1.0 | 1.8618  | 1.7 | 0.1789 | 1.4 | 0.83 | 1061 | 14 | 1068 | 11 | 1081 | 19 | 1081 | 19 | 98  |
| SL19-1 | 239 | 877  | 4258527 | 3.2  | 12.9537 | 0.7 | 2.0582  | 1.4 | 0.1934 | 1.3 | 0.88 | 1140 | 13 | 1135 | 10 | 1125 | 14 | 1125 | 14 | 101 |

|        |     |      |         |      |         |     |         |     |        |     |      |      |    |      |    |      |    |      |    |     |
|--------|-----|------|---------|------|---------|-----|---------|-----|--------|-----|------|------|----|------|----|------|----|------|----|-----|
| SL19-1 | 240 | 344  | 90223   | 3.1  | 10.9777 | 0.8 | 3.2119  | 1.5 | 0.2558 | 1.3 | 0.84 | 1468 | 17 | 1460 | 12 | 1448 | 16 | 1448 | 16 | 101 |
| SL19-1 | 241 | 426  | 106143  | 6.6  | 13.1886 | 1.1 | 1.6834  | 3.0 | 0.1611 | 2.7 | 0.92 | 963  | 24 | 1002 | 19 | 1090 | 23 | 1090 | 23 | 88  |
| SL19-1 | 242 | 273  | 760203  | 2.9  | 13.5081 | 0.9 | 1.7474  | 1.7 | 0.1713 | 1.4 | 0.86 | 1019 | 13 | 1026 | 11 | 1041 | 17 | 1041 | 17 | 98  |
| SL19-1 | 243 | 74   | 8659    | 2.3  | 12.9811 | 1.0 | 2.0802  | 1.4 | 0.1959 | 1.0 | 0.73 | 1153 | 11 | 1142 | 10 | 1121 | 20 | 1121 | 20 | 103 |
| SL19-1 | 244 | 161  | 147149  | 1.2  | 5.4443  | 0.8 | 13.3647 | 1.7 | 0.5279 | 1.5 | 0.87 | 2733 | 33 | 2706 | 16 | 2686 | 14 | 2686 | 14 | 102 |
| SL19-1 | 245 | 62   | 111094  | 0.7  | 13.4250 | 1.1 | 1.7374  | 1.9 | 0.1692 | 1.5 | 0.80 | 1008 | 14 | 1023 | 12 | 1054 | 23 | 1054 | 23 | 96  |
| SL19-1 | 246 | 548  | 51976   | 2.1  | 17.7474 | 0.9 | 0.5963  | 2.0 | 0.0768 | 1.8 | 0.90 | 477  | 8  | 475  | 8  | 465  | 19 | 477  | 8  | 103 |
| SL19-1 | 247 | 131  | 46189   | 2.0  | 13.3911 | 1.0 | 1.8226  | 1.7 | 0.1771 | 1.4 | 0.83 | 1051 | 14 | 1054 | 11 | 1059 | 19 | 1059 | 19 | 99  |
| SL19-1 | 248 | 306  | 107707  | 2.5  | 12.6000 | 0.9 | 2.2860  | 1.9 | 0.2090 | 1.7 | 0.89 | 1223 | 19 | 1208 | 13 | 1180 | 18 | 1180 | 18 | 104 |
| SL19-1 | 249 | 294  | 191620  | 1.9  | 13.5620 | 0.8 | 1.7751  | 1.3 | 0.1747 | 1.0 | 0.80 | 1038 | 10 | 1036 | 8  | 1033 | 16 | 1033 | 16 | 100 |
| SL19-1 | 251 | 418  | 422915  | 4.0  | 8.5212  | 0.7 | 5.6518  | 1.3 | 0.3494 | 1.2 | 0.87 | 1932 | 20 | 1924 | 12 | 1916 | 12 | 1916 | 12 | 101 |
| SL19-1 | 252 | 52   | 27227   | 0.4  | 9.8615  | 1.0 | 4.0145  | 1.5 | 0.2873 | 1.2 | 0.78 | 1628 | 17 | 1637 | 13 | 1649 | 18 | 1649 | 18 | 99  |
| SL19-1 | 253 | 281  | 107973  | 2.0  | 11.1035 | 0.6 | 3.1897  | 1.2 | 0.2570 | 1.0 | 0.87 | 1474 | 14 | 1455 | 9  | 1426 | 11 | 1426 | 11 | 103 |
| SL19-1 | 254 | 871  | 211459  | 7.5  | 12.5088 | 0.9 | 2.1748  | 1.7 | 0.1974 | 1.5 | 0.85 | 1161 | 16 | 1173 | 12 | 1195 | 18 | 1195 | 18 | 97  |
| SL19-1 | 255 | 99   | 89912   | 3.7  | 13.0413 | 0.9 | 1.9540  | 1.4 | 0.1849 | 1.1 | 0.79 | 1094 | 11 | 1100 | 10 | 1112 | 17 | 1112 | 17 | 98  |
| SL19-1 | 256 | 26   | 6302    | 2.4  | 13.4036 | 1.9 | 1.7987  | 2.3 | 0.1749 | 1.3 | 0.57 | 1039 | 13 | 1045 | 15 | 1057 | 38 | 1057 | 38 | 98  |
| SL19-1 | 257 | 360  | 77878   | 5.0  | 13.6257 | 0.8 | 1.8116  | 1.3 | 0.1791 | 1.0 | 0.78 | 1062 | 10 | 1050 | 8  | 1024 | 16 | 1024 | 16 | 104 |
| SL19-1 | 258 | 210  | 71608   | 1.6  | 10.1097 | 0.7 | 3.7041  | 2.2 | 0.2717 | 2.1 | 0.95 | 1549 | 29 | 1572 | 18 | 1603 | 13 | 1603 | 13 | 97  |
| SL19-1 | 259 | 172  | 64002   | 3.6  | 9.2694  | 0.7 | 4.7422  | 1.1 | 0.3189 | 0.8 | 0.72 | 1785 | 12 | 1775 | 9  | 1763 | 13 | 1763 | 13 | 101 |
| SL19-1 | 260 | 106  | 62644   | 2.5  | 9.9014  | 0.7 | 3.9204  | 1.3 | 0.2817 | 1.0 | 0.81 | 1600 | 15 | 1618 | 10 | 1642 | 14 | 1642 | 14 | 97  |
| SL19-1 | 261 | 78   | 20688   | 2.6  | 13.4969 | 1.0 | 1.8689  | 1.7 | 0.1830 | 1.3 | 0.80 | 1083 | 13 | 1070 | 11 | 1043 | 20 | 1043 | 20 | 104 |
| SL19-1 | 262 | 401  | 45320   | 3.9  | 13.5356 | 0.7 | 1.8273  | 1.3 | 0.1795 | 1.2 | 0.87 | 1064 | 11 | 1055 | 9  | 1037 | 14 | 1037 | 14 | 103 |
| SL19-1 | 263 | 63   | 17435   | 2.2  | 13.2132 | 1.2 | 1.9057  | 1.5 | 0.1827 | 1.0 | 0.66 | 1082 | 10 | 1083 | 10 | 1086 | 23 | 1086 | 23 | 100 |
| SL19-1 | 264 | 133  | 95841   | 1.8  | 17.4103 | 1.2 | 0.5980  | 1.8 | 0.0755 | 1.4 | 0.76 | 469  | 6  | 476  | 7  | 507  | 25 | 469  | 6  | 93  |
| SL19-1 | 265 | 571  | 602335  | 2.1  | 17.9807 | 0.9 | 0.5150  | 1.7 | 0.0672 | 1.4 | 0.82 | 419  | 6  | 422  | 6  | 436  | 21 | 419  | 6  | 96  |
| SL19-1 | 266 | 133  | 29021   | 3.1  | 14.3581 | 1.1 | 1.5205  | 1.7 | 0.1584 | 1.3 | 0.76 | 948  | 11 | 939  | 10 | 917  | 23 | 917  | 23 | 103 |
| SL19-1 | 267 | 138  | 35031   | 4.4  | 12.6743 | 0.9 | 2.1658  | 1.5 | 0.1992 | 1.3 | 0.83 | 1171 | 14 | 1170 | 11 | 1169 | 17 | 1169 | 17 | 100 |
| SL19-1 | 268 | 139  | 72290   | 2.1  | 12.1304 | 1.1 | 2.4723  | 1.6 | 0.2176 | 1.2 | 0.75 | 1269 | 14 | 1264 | 12 | 1255 | 21 | 1255 | 21 | 101 |
| SL19-1 | 269 | 216  | 119999  | 2.1  | 13.3744 | 1.0 | 1.9114  | 1.5 | 0.1855 | 1.2 | 0.76 | 1097 | 12 | 1085 | 10 | 1061 | 20 | 1061 | 20 | 103 |
| SL19-1 | 271 | 546  | 286570  | 3.0  | 12.7978 | 0.8 | 2.1605  | 2.2 | 0.2006 | 2.0 | 0.93 | 1179 | 22 | 1168 | 15 | 1150 | 15 | 1150 | 15 | 103 |
| SL19-1 | 272 | 184  | 70957   | 1.9  | 13.3842 | 1.0 | 1.8895  | 1.6 | 0.1835 | 1.3 | 0.78 | 1086 | 13 | 1077 | 11 | 1060 | 21 | 1060 | 21 | 102 |
| SL19-1 | 273 | 187  | 79547   | 3.2  | 13.3090 | 1.0 | 1.8604  | 1.7 | 0.1797 | 1.4 | 0.81 | 1065 | 13 | 1067 | 11 | 1071 | 20 | 1071 | 20 | 99  |
| SL19-1 | 274 | 269  | 68779   | 3.7  | 11.7863 | 1.0 | 2.4728  | 2.1 | 0.2115 | 1.8 | 0.86 | 1237 | 20 | 1264 | 15 | 1311 | 20 | 1311 | 20 | 94  |
| SL19-1 | 275 | 98   | 30921   | 9.6  | 13.8860 | 0.9 | 1.6400  | 1.5 | 0.1652 | 1.2 | 0.80 | 986  | 11 | 986  | 9  | 985  | 18 | 985  | 18 | 100 |
| SL19-1 | 276 | 106  | 41231   | 1.9  | 13.7137 | 1.0 | 1.7023  | 1.7 | 0.1694 | 1.4 | 0.80 | 1009 | 13 | 1009 | 11 | 1011 | 21 | 1011 | 21 | 100 |
| SL19-1 | 277 | 354  | 112541  | 2.8  | 9.3612  | 0.7 | 4.5850  | 1.7 | 0.3114 | 1.5 | 0.92 | 1748 | 24 | 1747 | 14 | 1745 | 12 | 1745 | 12 | 100 |
| SL19-1 | 278 | 362  | 34912   | 2.5  | 14.1590 | 1.2 | 1.5119  | 1.8 | 0.1553 | 1.4 | 0.76 | 931  | 12 | 935  | 11 | 946  | 24 | 946  | 24 | 98  |
| SL19-1 | 279 | 1470 | 1168408 | 5.0  | 13.5652 | 0.7 | 1.7699  | 1.5 | 0.1742 | 1.3 | 0.89 | 1035 | 13 | 1034 | 10 | 1033 | 14 | 1033 | 14 | 100 |
| SL19-1 | 280 | 547  | 159115  | 16.2 | 12.8402 | 0.7 | 2.0933  | 1.6 | 0.1950 | 1.4 | 0.90 | 1149 | 15 | 1147 | 11 | 1143 | 14 | 1143 | 14 | 100 |
| SL19-1 | 281 | 493  | 28918   | 1.5  | 17.9991 | 0.9 | 0.5572  | 1.4 | 0.0728 | 1.1 | 0.78 | 453  | 5  | 450  | 5  | 434  | 20 | 453  | 5  | 104 |
| SL19-1 | 282 | 221  | 166773  | 1.5  | 10.8483 | 0.9 | 3.1682  | 1.6 | 0.2494 | 1.4 | 0.84 | 1435 | 18 | 1449 | 13 | 1470 | 17 | 1470 | 17 | 98  |
| SL19-1 | 283 | 144  | 119279  | 1.6  | 11.5038 | 0.9 | 2.6960  | 1.5 | 0.2250 | 1.3 | 0.81 | 1308 | 15 | 1327 | 11 | 1358 | 17 | 1358 | 17 | 96  |
| SL19-1 | 284 | 239  | 66684   | 2.9  | 14.4796 | 0.9 | 1.4942  | 1.5 | 0.1570 | 1.3 | 0.83 | 940  | 11 | 928  | 9  | 900  | 18 | 900  | 18 | 104 |
| SL19-1 | 285 | 239  | 88829   | 1.4  | 9.9549  | 0.7 | 4.0161  | 1.1 | 0.2901 | 0.8 | 0.77 | 1642 | 12 | 1637 | 9  | 1632 | 12 | 1632 | 12 | 101 |
| SL19-1 | 286 | 213  | 55269   | 2.9  | 11.4605 | 0.9 | 2.8874  | 1.4 | 0.2401 | 1.0 | 0.72 | 1387 | 12 | 1379 | 10 | 1365 | 18 | 1365 | 18 | 102 |
| SL19-1 | 287 | 354  | 900674  | 5.7  | 13.5869 | 0.9 | 1.7429  | 1.7 | 0.1718 | 1.5 | 0.85 | 1022 | 14 | 1025 | 11 | 1030 | 18 | 1030 | 18 | 99  |

|        |     |      |           |      |         |     |         |     |        |     |      |      |    |      |    |      |    |      |    |     |
|--------|-----|------|-----------|------|---------|-----|---------|-----|--------|-----|------|------|----|------|----|------|----|------|----|-----|
| SL19-1 | 288 | 172  | 43709     | 2.9  | 13.6543 | 0.9 | 1.7408  | 1.6 | 0.1725 | 1.2 | 0.80 | 1026 | 12 | 1024 | 10 | 1020 | 19 | 1020 | 19 | 101 |
| SL19-1 | 289 | 329  | 497699    | 14.2 | 12.8679 | 0.8 | 2.1264  | 1.5 | 0.1985 | 1.2 | 0.82 | 1167 | 13 | 1157 | 10 | 1139 | 17 | 1139 | 17 | 103 |
| SL19-1 | 290 | 124  | 23972     | 1.3  | 13.3555 | 0.9 | 1.9421  | 1.5 | 0.1882 | 1.2 | 0.79 | 1112 | 12 | 1096 | 10 | 1064 | 19 | 1064 | 19 | 104 |
| SL19-1 | 292 | 217  | 636546    | 3.6  | 13.3747 | 0.9 | 1.8072  | 1.5 | 0.1754 | 1.3 | 0.81 | 1042 | 12 | 1048 | 10 | 1061 | 18 | 1061 | 18 | 98  |
| SL19-1 | 293 | 55   | 41142     | 1.2  | 9.8955  | 0.8 | 3.9468  | 1.9 | 0.2834 | 1.7 | 0.91 | 1608 | 25 | 1623 | 15 | 1643 | 15 | 1643 | 15 | 98  |
| SL19-1 | 294 | 119  | 481849    | 3.3  | 5.3599  | 1.5 | 12.7524 | 2.7 | 0.4959 | 2.3 | 0.83 | 2596 | 48 | 2662 | 26 | 2711 | 25 | 2711 | 25 | 96  |
| SL19-1 | 295 | 137  | 89159     | 3.0  | 13.3215 | 1.1 | 1.7840  | 1.7 | 0.1724 | 1.3 | 0.76 | 1026 | 12 | 1040 | 11 | 1069 | 22 | 1069 | 22 | 96  |
| SL19-1 | 296 | 38   | 29295     | 1.9  | 8.5735  | 0.8 | 5.4213  | 1.9 | 0.3372 | 1.8 | 0.91 | 1873 | 29 | 1888 | 17 | 1905 | 14 | 1905 | 14 | 98  |
| SL19-1 | 297 | 800  | 145665957 | 4.7  | 12.6830 | 1.0 | 2.1087  | 1.8 | 0.1941 | 1.5 | 0.85 | 1143 | 16 | 1152 | 13 | 1167 | 19 | 1167 | 19 | 98  |
| SL19-1 | 298 | 146  | 72894     | 3.1  | 12.9015 | 1.2 | 1.9862  | 2.3 | 0.1859 | 2.0 | 0.86 | 1099 | 20 | 1111 | 15 | 1133 | 24 | 1133 | 24 | 97  |
| SL19-1 | 299 | 112  | 29770     | 2.9  | 12.8850 | 0.8 | 2.0191  | 1.5 | 0.1888 | 1.2 | 0.82 | 1115 | 12 | 1122 | 10 | 1136 | 17 | 1136 | 17 | 98  |
| SL19-1 | 300 | 1326 | 53422     | 5.4  | 12.1509 | 1.0 | 2.2568  | 1.5 | 0.1990 | 1.2 | 0.77 | 1170 | 13 | 1199 | 11 | 1252 | 19 | 1252 | 19 | 93  |
| SL19-1 | 301 | 106  | 74353     | 2.6  | 10.5273 | 1.0 | 3.5350  | 1.8 | 0.2700 | 1.5 | 0.83 | 1541 | 21 | 1535 | 15 | 1527 | 20 | 1527 | 20 | 101 |
| SL19-1 | 302 | 138  | 21326     | 1.7  | 12.6514 | 0.8 | 2.1486  | 1.3 | 0.1972 | 1.0 | 0.79 | 1160 | 11 | 1165 | 9  | 1172 | 16 | 1172 | 16 | 99  |
| SL19-1 | 303 | 276  | 176618    | 1.8  | 11.9356 | 1.1 | 2.4962  | 2.0 | 0.2162 | 1.7 | 0.84 | 1262 | 19 | 1271 | 14 | 1287 | 21 | 1287 | 21 | 98  |
| SL19-1 | 304 | 36   | 25930     | 1.6  | 13.1041 | 1.3 | 1.9409  | 1.9 | 0.1845 | 1.4 | 0.72 | 1092 | 14 | 1095 | 13 | 1102 | 26 | 1102 | 26 | 99  |
| SL19-1 | 305 | 40   | 7943634   | 0.9  | 9.9668  | 1.2 | 4.0103  | 2.5 | 0.2900 | 2.2 | 0.87 | 1642 | 31 | 1636 | 20 | 1629 | 23 | 1629 | 23 | 101 |
| SL19-1 | 306 | 87   | 3490      | 1.3  | 4.2015  | 2.6 | 18.6173 | 3.0 | 0.5676 | 1.4 | 0.47 | 2898 | 33 | 3022 | 29 | 3106 | 42 | 3106 | 42 | 93  |
| SL19-1 | 307 | 153  | 85632     | 0.9  | 5.2507  | 0.8 | 13.6115 | 1.7 | 0.5186 | 1.5 | 0.88 | 2693 | 34 | 2723 | 17 | 2745 | 14 | 2745 | 14 | 98  |
| SL19-1 | 308 | 126  | 16078     | 1.4  | 17.7984 | 1.7 | 0.5621  | 2.0 | 0.0726 | 1.1 | 0.56 | 452  | 5  | 453  | 7  | 459  | 37 | 452  | 5  | 98  |
| SL19-1 | 309 | 26   | 12442     | 1.5  | 14.2394 | 1.6 | 1.5351  | 2.2 | 0.1586 | 1.6 | 0.70 | 949  | 14 | 945  | 14 | 934  | 33 | 934  | 33 | 102 |
| SL19-1 | 311 | 200  | 12360     | 2.5  | 18.2300 | 1.1 | 0.4922  | 2.0 | 0.0651 | 1.7 | 0.85 | 407  | 7  | 406  | 7  | 405  | 24 | 407  | 7  | 100 |
| SL19-1 | 312 | 408  | 208519    | 2.5  | 13.6239 | 0.7 | 1.7263  | 1.5 | 0.1706 | 1.3 | 0.88 | 1016 | 13 | 1018 | 10 | 1024 | 14 | 1024 | 14 | 99  |
| SL19-1 | 313 | 159  | 71581     | 3.2  | 13.2019 | 0.9 | 1.8500  | 1.6 | 0.1772 | 1.4 | 0.84 | 1052 | 13 | 1063 | 11 | 1088 | 18 | 1088 | 18 | 97  |
| SL19-1 | 314 | 535  | 3207980   | 3.7  | 12.6318 | 1.2 | 2.1349  | 1.9 | 0.1957 | 1.5 | 0.77 | 1152 | 16 | 1160 | 13 | 1175 | 25 | 1175 | 25 | 98  |
| SL19-1 | 315 | 192  | 37239     | 2.7  | 13.7230 | 0.9 | 1.7343  | 1.7 | 0.1727 | 1.5 | 0.86 | 1027 | 14 | 1021 | 11 | 1009 | 17 | 1009 | 17 | 102 |

|        |    |     |         |     |         |     |         |     |        |     |      |      |    |      |    |      |    |      |    |     |
|--------|----|-----|---------|-----|---------|-----|---------|-----|--------|-----|------|------|----|------|----|------|----|------|----|-----|
| SL17-5 | 1  | 283 | 91268   | 1.7 | 16.4923 | 0.7 | 0.8534  | 1.5 | 0.1021 | 1.3 | 0.86 | 627  | 8  | 627  | 7  | 625  | 16 | 627  | 8  | 100 |
| SL17-5 | 2  | 148 | 24539   | 2.8 | 17.9490 | 1.1 | 0.5476  | 1.4 | 0.0713 | 1.0 | 0.68 | 444  | 4  | 443  | 5  | 440  | 23 | 444  | 4  | 101 |
| SL17-5 | 3  | 142 | 97453   | 3.8 | 5.0492  | 0.7 | 14.3464 | 1.2 | 0.5256 | 1.1 | 0.85 | 2723 | 24 | 2773 | 12 | 2809 | 11 | 2809 | 11 | 97  |
| SL17-5 | 4  | 189 | 400013  | 3.8 | 5.0179  | 0.8 | 13.0637 | 1.4 | 0.4756 | 1.1 | 0.80 | 2508 | 23 | 2684 | 13 | 2820 | 13 | 2820 | 13 | 89  |
| SL17-5 | 5  | 40  | 17812   | 0.8 | 13.7175 | 1.1 | 1.7252  | 1.5 | 0.1717 | 1.1 | 0.72 | 1022 | 10 | 1018 | 10 | 1010 | 21 | 1010 | 21 | 101 |
| SL17-5 | 6  | 224 | 110037  | 2.8 | 12.5946 | 0.5 | 2.1572  | 1.1 | 0.1971 | 1.0 | 0.89 | 1160 | 11 | 1167 | 8  | 1181 | 10 | 1181 | 10 | 98  |
| SL17-5 | 7  | 26  | 19123   | 0.9 | 14.0190 | 1.3 | 1.4965  | 1.7 | 0.1522 | 1.1 | 0.64 | 913  | 10 | 929  | 11 | 966  | 27 | 966  | 27 | 95  |
| SL17-5 | 8  | 484 | 501655  | 3.3 | 13.5232 | 0.7 | 1.7691  | 1.3 | 0.1736 | 1.0 | 0.82 | 1032 | 10 | 1034 | 8  | 1039 | 15 | 1039 | 15 | 99  |
| SL17-5 | 9  | 163 | 123520  | 3.7 | 9.8192  | 0.8 | 4.0812  | 1.5 | 0.2908 | 1.3 | 0.84 | 1645 | 19 | 1651 | 13 | 1657 | 16 | 1657 | 16 | 99  |
| SL17-5 | 10 | 81  | 16474   | 4.4 | 13.8534 | 0.7 | 1.6715  | 1.1 | 0.1680 | 0.9 | 0.77 | 1001 | 8  | 998  | 7  | 990  | 14 | 990  | 14 | 101 |
| SL17-5 | 11 | 201 | 98737   | 1.8 | 12.5121 | 0.7 | 2.2146  | 1.3 | 0.2011 | 1.1 | 0.86 | 1181 | 12 | 1186 | 9  | 1194 | 13 | 1194 | 13 | 99  |
| SL17-5 | 12 | 227 | 189652  | 3.7 | 14.0648 | 0.6 | 1.4879  | 1.1 | 0.1518 | 0.9 | 0.82 | 911  | 8  | 925  | 7  | 959  | 13 | 959  | 13 | 95  |
| SL17-5 | 14 | 160 | 227360  | 6.5 | 13.3841 | 0.6 | 1.8700  | 1.0 | 0.1816 | 0.9 | 0.83 | 1076 | 8  | 1071 | 7  | 1060 | 12 | 1060 | 12 | 101 |
| SL17-5 | 15 | 93  | 73849   | 2.8 | 12.7688 | 0.9 | 2.0872  | 1.3 | 0.1934 | 0.9 | 0.72 | 1140 | 10 | 1145 | 9  | 1154 | 18 | 1154 | 18 | 99  |
| SL17-5 | 16 | 32  | 7414    | 1.3 | 13.6688 | 1.0 | 1.7557  | 1.3 | 0.1741 | 0.9 | 0.68 | 1035 | 9  | 1029 | 9  | 1017 | 20 | 1017 | 20 | 102 |
| SL17-5 | 17 | 130 | 174805  | 6.1 | 13.5631 | 0.9 | 1.7920  | 1.2 | 0.1764 | 0.8 | 0.67 | 1047 | 7  | 1043 | 8  | 1033 | 17 | 1033 | 17 | 101 |
| SL17-5 | 18 | 169 | 3932522 | 1.6 | 9.8782  | 0.6 | 3.9595  | 1.3 | 0.2838 | 1.1 | 0.89 | 1610 | 16 | 1626 | 10 | 1646 | 11 | 1646 | 11 | 98  |
| SL17-5 | 19 | 82  | 82068   | 1.4 | 9.8463  | 0.7 | 3.9355  | 1.3 | 0.2812 | 1.1 | 0.83 | 1597 | 15 | 1621 | 11 | 1652 | 13 | 1652 | 13 | 97  |
| SL17-5 | 20 | 108 | 145464  | 2.1 | 12.7780 | 0.8 | 2.1196  | 1.4 | 0.1965 | 1.2 | 0.82 | 1157 | 13 | 1155 | 10 | 1153 | 16 | 1153 | 16 | 100 |

|        |    |      |         |      |         |     |         |     |        |     |      |      |    |      |    |      |    |      |    |     |
|--------|----|------|---------|------|---------|-----|---------|-----|--------|-----|------|------|----|------|----|------|----|------|----|-----|
| SL17-5 | 21 | 62   | 48700   | 1.1  | 9.8072  | 0.8 | 3.9776  | 1.3 | 0.2830 | 1.0 | 0.78 | 1607 | 15 | 1630 | 11 | 1659 | 15 | 1659 | 15 | 97  |
| SL17-5 | 22 | 41   | 26826   | 2.5  | 12.2586 | 1.1 | 2.3670  | 1.6 | 0.2105 | 1.1 | 0.71 | 1232 | 13 | 1233 | 11 | 1235 | 22 | 1235 | 22 | 100 |
| SL17-5 | 23 | 65   | 82086   | 1.9  | 10.9924 | 0.7 | 3.1126  | 1.4 | 0.2483 | 1.2 | 0.86 | 1429 | 15 | 1436 | 11 | 1445 | 13 | 1445 | 13 | 99  |
| SL17-5 | 25 | 112  | 70195   | 1.3  | 14.0680 | 0.9 | 1.6319  | 1.5 | 0.1666 | 1.2 | 0.79 | 993  | 11 | 983  | 10 | 959  | 19 | 959  | 19 | 104 |
| SL17-5 | 26 | 48   | 52833   | 2.0  | 13.3683 | 0.8 | 1.8650  | 1.3 | 0.1809 | 1.0 | 0.79 | 1072 | 10 | 1069 | 8  | 1062 | 16 | 1062 | 16 | 101 |
| SL17-5 | 27 | 53   | 95793   | 1.5  | 12.8331 | 1.3 | 1.7206  | 2.3 | 0.1602 | 1.9 | 0.83 | 958  | 17 | 1016 | 15 | 1144 | 26 | 1144 | 26 | 84  |
| SL17-5 | 28 | 105  | 295230  | 4.9  | 11.9072 | 0.7 | 2.7050  | 1.3 | 0.2337 | 1.1 | 0.86 | 1354 | 14 | 1330 | 10 | 1291 | 13 | 1291 | 13 | 105 |
| SL17-5 | 29 | 154  | 140228  | 2.4  | 12.9375 | 0.7 | 2.0923  | 1.2 | 0.1964 | 1.0 | 0.81 | 1156 | 10 | 1146 | 8  | 1128 | 14 | 1128 | 14 | 102 |
| SL17-5 | 30 | 105  | 112180  | 1.3  | 9.7900  | 0.8 | 4.0515  | 1.1 | 0.2878 | 0.9 | 0.75 | 1631 | 13 | 1645 | 9  | 1663 | 14 | 1663 | 14 | 98  |
| SL17-5 | 31 | 190  | 99583   | 1.6  | 13.4066 | 0.7 | 1.9051  | 1.2 | 0.1853 | 1.0 | 0.82 | 1096 | 10 | 1083 | 8  | 1057 | 14 | 1057 | 14 | 104 |
| SL17-5 | 32 | 876  | 461218  | 6.2  | 8.8888  | 0.6 | 4.8616  | 1.1 | 0.3136 | 0.9 | 0.85 | 1758 | 15 | 1796 | 9  | 1839 | 11 | 1839 | 11 | 96  |
| SL17-5 | 33 | 181  | 244766  | 3.3  | 9.3848  | 0.7 | 4.4694  | 1.1 | 0.3043 | 0.9 | 0.79 | 1713 | 13 | 1725 | 9  | 1740 | 13 | 1740 | 13 | 98  |
| SL17-5 | 34 | 43   | 73827   | 0.9  | 12.4193 | 0.8 | 2.2307  | 1.4 | 0.2010 | 1.1 | 0.82 | 1181 | 12 | 1191 | 10 | 1209 | 16 | 1209 | 16 | 98  |
| SL17-5 | 35 | 88   | 523666  | 1.5  | 2.7488  | 0.7 | 39.7087 | 1.3 | 0.7920 | 1.0 | 0.83 | 3760 | 30 | 3763 | 12 | 3765 | 11 | 3765 | 11 | 100 |
| SL17-5 | 36 | 215  | 388644  | 4.9  | 12.7747 | 0.8 | 2.0565  | 1.5 | 0.1906 | 1.3 | 0.86 | 1125 | 13 | 1134 | 10 | 1153 | 15 | 1153 | 15 | 98  |
| SL17-5 | 37 | 81   | 65525   | 1.4  | 5.6258  | 0.6 | 11.7700 | 1.2 | 0.4805 | 1.1 | 0.86 | 2529 | 22 | 2586 | 12 | 2631 | 11 | 2631 | 11 | 96  |
| SL17-5 | 38 | 162  | 221302  | 2.7  | 12.5498 | 0.6 | 2.2157  | 1.2 | 0.2018 | 1.1 | 0.88 | 1185 | 12 | 1186 | 9  | 1188 | 12 | 1188 | 12 | 100 |
| SL17-5 | 39 | 91   | 154122  | 1.7  | 5.7297  | 0.7 | 11.5093 | 1.1 | 0.4785 | 0.9 | 0.82 | 2521 | 19 | 2565 | 11 | 2601 | 11 | 2601 | 11 | 97  |
| SL17-5 | 40 | 151  | 137487  | 1.8  | 9.4492  | 0.7 | 4.3934  | 0.9 | 0.3012 | 0.6 | 0.67 | 1697 | 9  | 1711 | 7  | 1728 | 12 | 1728 | 12 | 98  |
| SL17-5 | 41 | 70   | 136110  | 1.7  | 5.3732  | 0.6 | 13.7593 | 1.2 | 0.5364 | 1.0 | 0.86 | 2769 | 23 | 2733 | 11 | 2707 | 10 | 2707 | 10 | 102 |
| SL17-5 | 42 | 89   | 162749  | 2.6  | 12.9435 | 0.9 | 2.0482  | 1.5 | 0.1924 | 1.1 | 0.77 | 1134 | 12 | 1132 | 10 | 1127 | 19 | 1127 | 19 | 101 |
| SL17-5 | 43 | 140  | 120477  | 1.3  | 9.7710  | 0.7 | 4.2190  | 1.3 | 0.2991 | 1.0 | 0.81 | 1687 | 15 | 1678 | 10 | 1666 | 14 | 1666 | 14 | 101 |
| SL17-5 | 44 | 219  | 933838  | 1.3  | 13.3138 | 0.8 | 1.8442  | 1.3 | 0.1782 | 1.1 | 0.80 | 1057 | 10 | 1061 | 9  | 1071 | 16 | 1071 | 16 | 99  |
| SL17-5 | 45 | 204  | 1116094 | 3.9  | 9.2291  | 0.9 | 4.8079  | 1.6 | 0.3220 | 1.3 | 0.83 | 1799 | 21 | 1786 | 13 | 1771 | 16 | 1771 | 16 | 102 |
| SL17-5 | 46 | 236  | 104973  | 1.7  | 13.4282 | 0.7 | 1.8488  | 1.3 | 0.1801 | 1.2 | 0.86 | 1068 | 11 | 1063 | 9  | 1053 | 14 | 1053 | 14 | 101 |
| SL17-5 | 47 | 39   | 638125  | 1.3  | 13.1401 | 1.1 | 1.8574  | 1.5 | 0.1771 | 1.0 | 0.68 | 1051 | 10 | 1066 | 10 | 1097 | 21 | 1097 | 21 | 96  |
| SL17-5 | 48 | 239  | 2260303 | 3.2  | 9.1750  | 0.7 | 4.6417  | 1.3 | 0.3090 | 1.1 | 0.82 | 1736 | 16 | 1757 | 11 | 1782 | 14 | 1782 | 14 | 97  |
| SL17-5 | 50 | 124  | 96934   | 3.1  | 11.7461 | 0.7 | 2.5788  | 1.2 | 0.2198 | 1.0 | 0.83 | 1281 | 12 | 1295 | 9  | 1318 | 13 | 1318 | 13 | 97  |
| SL17-5 | 52 | 122  | 111829  | 3.7  | 13.7032 | 1.0 | 1.7477  | 1.3 | 0.1738 | 0.9 | 0.67 | 1033 | 8  | 1026 | 8  | 1012 | 19 | 1012 | 19 | 102 |
| SL17-5 | 53 | 40   | 21255   | 3.5  | 14.2770 | 1.0 | 1.5227  | 1.4 | 0.1577 | 0.9 | 0.68 | 944  | 8  | 940  | 8  | 929  | 20 | 929  | 20 | 102 |
| SL17-5 | 54 | 205  | 59090   | 5.3  | 13.7250 | 0.7 | 1.7307  | 1.1 | 0.1724 | 0.8 | 0.75 | 1025 | 8  | 1020 | 7  | 1009 | 15 | 1009 | 15 | 102 |
| SL17-5 | 55 | 54   | 50943   | 2.5  | 13.4970 | 1.0 | 1.8216  | 1.5 | 0.1784 | 1.1 | 0.74 | 1058 | 11 | 1053 | 10 | 1043 | 21 | 1043 | 21 | 101 |
| SL17-5 | 56 | 113  | 305529  | 4.0  | 13.6469 | 0.6 | 1.7490  | 1.1 | 0.1732 | 0.9 | 0.82 | 1030 | 8  | 1027 | 7  | 1021 | 12 | 1021 | 12 | 101 |
| SL17-5 | 57 | 535  | 506849  | 2.7  | 12.8527 | 0.7 | 2.0751  | 1.2 | 0.1935 | 1.0 | 0.83 | 1140 | 10 | 1141 | 8  | 1141 | 13 | 1141 | 13 | 100 |
| SL17-5 | 58 | 177  | 251091  | 2.0  | 11.9175 | 0.8 | 2.5477  | 1.3 | 0.2203 | 1.0 | 0.77 | 1283 | 12 | 1286 | 10 | 1290 | 16 | 1290 | 16 | 100 |
| SL17-5 | 59 | 590  | 411121  | 4.1  | 13.2060 | 0.8 | 1.8414  | 1.4 | 0.1764 | 1.2 | 0.83 | 1047 | 12 | 1060 | 9  | 1087 | 16 | 1087 | 16 | 96  |
| SL17-5 | 60 | 284  | 398354  | 1.8  | 9.7027  | 0.7 | 4.2658  | 1.3 | 0.3003 | 1.0 | 0.83 | 1693 | 16 | 1687 | 10 | 1679 | 13 | 1679 | 13 | 101 |
| SL17-5 | 61 | 393  | 659450  | 5.0  | 9.2042  | 0.5 | 4.7696  | 1.4 | 0.3185 | 1.3 | 0.93 | 1783 | 20 | 1780 | 12 | 1776 | 9  | 1776 | 9  | 100 |
| SL17-5 | 62 | 1275 | 68903   | 21.4 | 5.4686  | 0.7 | 11.2727 | 1.8 | 0.4473 | 1.7 | 0.93 | 2383 | 33 | 2546 | 17 | 2678 | 11 | 2678 | 11 | 89  |
| SL17-5 | 63 | 81   | 124245  | 5.6  | 13.6323 | 0.8 | 1.7558  | 1.2 | 0.1737 | 1.0 | 0.78 | 1032 | 9  | 1029 | 8  | 1023 | 16 | 1023 | 16 | 101 |
| SL17-5 | 65 | 63   | 181165  | 1.9  | 13.3652 | 0.9 | 1.8420  | 1.2 | 0.1786 | 0.8 | 0.67 | 1059 | 8  | 1061 | 8  | 1063 | 18 | 1063 | 18 | 100 |
| SL17-5 | 66 | 484  | 286734  | 3.1  | 14.1646 | 0.6 | 1.5356  | 1.0 | 0.1578 | 0.9 | 0.84 | 945  | 8  | 945  | 6  | 945  | 12 | 945  | 12 | 100 |
| SL17-5 | 67 | 52   | 21369   | 1.9  | 11.4605 | 0.8 | 2.7800  | 1.4 | 0.2312 | 1.1 | 0.81 | 1341 | 14 | 1350 | 10 | 1365 | 16 | 1365 | 16 | 98  |
| SL17-5 | 68 | 19   | 12562   | 1.9  | 13.7974 | 1.2 | 1.6889  | 1.5 | 0.1691 | 0.9 | 0.60 | 1007 | 9  | 1004 | 10 | 998  | 25 | 998  | 25 | 101 |
| SL17-5 | 69 | 72   | 96841   | 1.1  | 10.7526 | 0.7 | 3.3228  | 1.3 | 0.2592 | 1.0 | 0.82 | 1486 | 14 | 1486 | 10 | 1487 | 14 | 1487 | 14 | 100 |
| SL17-5 | 70 | 96   | 531134  | 1.1  | 10.0373 | 0.8 | 3.9069  | 1.2 | 0.2845 | 0.9 | 0.74 | 1614 | 13 | 1615 | 10 | 1616 | 15 | 1616 | 15 | 100 |

|        |     |     |          |      |         |     |         |     |        |     |      |      |    |      |    |      |    |      |    |     |
|--------|-----|-----|----------|------|---------|-----|---------|-----|--------|-----|------|------|----|------|----|------|----|------|----|-----|
| SL17-5 | 72  | 130 | 192230   | 2.2  | 10.5847 | 0.8 | 3.5812  | 1.5 | 0.2750 | 1.2 | 0.84 | 1566 | 17 | 1545 | 12 | 1517 | 15 | 1517 | 15 | 103 |
| SL17-5 | 73  | 664 | 171848   | 1.6  | 9.5723  | 0.7 | 4.0365  | 1.2 | 0.2804 | 1.0 | 0.81 | 1593 | 13 | 1642 | 10 | 1704 | 13 | 1704 | 13 | 93  |
| SL17-5 | 74  | 160 | 81630616 | 2.8  | 13.4551 | 0.7 | 1.8600  | 1.3 | 0.1816 | 1.1 | 0.84 | 1076 | 11 | 1067 | 9  | 1049 | 14 | 1049 | 14 | 103 |
| SL17-5 | 75  | 100 | 162731   | 2.8  | 10.1073 | 0.7 | 3.8744  | 1.1 | 0.2841 | 0.8 | 0.77 | 1612 | 12 | 1608 | 9  | 1603 | 13 | 1603 | 13 | 101 |
| SL17-5 | 77  | 41  | 33602    | 2.3  | 13.5147 | 1.2 | 1.8606  | 1.5 | 0.1825 | 1.0 | 0.64 | 1080 | 10 | 1067 | 10 | 1040 | 24 | 1040 | 24 | 104 |
| SL17-5 | 78  | 40  | 35398    | 1.9  | 13.7900 | 1.0 | 1.7387  | 1.3 | 0.1740 | 0.9 | 0.69 | 1034 | 9  | 1023 | 9  | 1000 | 20 | 1000 | 20 | 103 |
| SL17-5 | 79  | 94  | 19949    | 1.3  | 13.6262 | 0.8 | 1.7890  | 1.2 | 0.1769 | 0.9 | 0.72 | 1050 | 8  | 1041 | 8  | 1024 | 17 | 1024 | 17 | 103 |
| SL17-5 | 80  | 71  | 38806    | 2.7  | 12.1498 | 0.8 | 2.3818  | 1.3 | 0.2100 | 1.0 | 0.79 | 1229 | 11 | 1237 | 9  | 1252 | 15 | 1252 | 15 | 98  |
| SL17-5 | 81  | 103 | 39650    | 2.7  | 13.5580 | 0.6 | 1.8391  | 1.1 | 0.1809 | 0.8 | 0.79 | 1072 | 8  | 1060 | 7  | 1034 | 13 | 1034 | 13 | 104 |
| SL17-5 | 82  | 85  | 476572   | 2.5  | 13.4999 | 0.8 | 1.7903  | 1.1 | 0.1754 | 0.8 | 0.72 | 1042 | 8  | 1042 | 7  | 1043 | 16 | 1043 | 16 | 100 |
| SL17-5 | 83  | 232 | 431989   | 12.5 | 13.1239 | 0.8 | 1.9279  | 1.1 | 0.1836 | 0.8 | 0.70 | 1087 | 8  | 1091 | 7  | 1099 | 16 | 1099 | 16 | 99  |
| SL17-5 | 84  | 190 | 1185362  | 3.9  | 13.5715 | 0.7 | 1.7457  | 1.2 | 0.1719 | 1.0 | 0.82 | 1023 | 9  | 1026 | 8  | 1032 | 14 | 1032 | 14 | 99  |
| SL17-5 | 85  | 862 | 214047   | 3.9  | 12.9827 | 0.6 | 2.0768  | 1.0 | 0.1956 | 0.8 | 0.82 | 1152 | 9  | 1141 | 7  | 1121 | 12 | 1121 | 12 | 103 |
| SL17-5 | 86  | 214 | 799185   | 3.3  | 13.4201 | 0.5 | 1.8472  | 1.1 | 0.1799 | 0.9 | 0.89 | 1066 | 9  | 1062 | 7  | 1055 | 10 | 1055 | 10 | 101 |
| SL17-5 | 87  | 219 | 99200    | 3.0  | 11.8290 | 0.7 | 2.6930  | 1.3 | 0.2311 | 1.1 | 0.85 | 1340 | 14 | 1327 | 10 | 1304 | 13 | 1304 | 13 | 103 |
| SL17-5 | 88  | 118 | 87221    | 1.5  | 12.0100 | 0.7 | 2.5163  | 1.1 | 0.2193 | 0.9 | 0.76 | 1278 | 10 | 1277 | 8  | 1275 | 14 | 1275 | 14 | 100 |
| SL17-5 | 89  | 48  | 107841   | 3.8  | 10.8451 | 1.0 | 3.3598  | 1.3 | 0.2644 | 1.0 | 0.71 | 1512 | 13 | 1495 | 11 | 1471 | 18 | 1471 | 18 | 103 |
| SL17-5 | 90  | 281 | 137000   | 4.0  | 12.9805 | 0.5 | 2.0333  | 1.4 | 0.1915 | 1.3 | 0.93 | 1130 | 13 | 1127 | 10 | 1121 | 10 | 1121 | 10 | 101 |
| SL17-5 | 91  | 106 | 115441   | 2.1  | 12.6518 | 0.7 | 2.1416  | 1.3 | 0.1966 | 1.0 | 0.84 | 1157 | 11 | 1162 | 9  | 1172 | 14 | 1172 | 14 | 99  |
| SL17-5 | 93  | 57  | 460983   | 1.6  | 13.8911 | 0.8 | 1.7178  | 1.4 | 0.1731 | 1.1 | 0.80 | 1029 | 10 | 1015 | 9  | 985  | 17 | 985  | 17 | 105 |
| SL17-5 | 95  | 130 | 92247    | 5.4  | 9.8667  | 0.9 | 3.9911  | 1.6 | 0.2857 | 1.3 | 0.82 | 1620 | 18 | 1632 | 13 | 1648 | 17 | 1648 | 17 | 98  |
| SL17-5 | 96  | 68  | 90129    | 2.6  | 12.4576 | 0.8 | 2.1932  | 1.4 | 0.1982 | 1.2 | 0.83 | 1166 | 13 | 1179 | 10 | 1203 | 16 | 1203 | 16 | 97  |
| SL17-5 | 97  | 110 | 636995   | 3.0  | 8.5654  | 0.6 | 5.4556  | 1.1 | 0.3391 | 0.9 | 0.83 | 1882 | 14 | 1894 | 9  | 1906 | 11 | 1906 | 11 | 99  |
| SL17-5 | 98  | 92  | 65273    | 1.2  | 13.6956 | 0.8 | 1.7152  | 1.2 | 0.1704 | 0.8 | 0.70 | 1015 | 8  | 1014 | 8  | 1013 | 17 | 1013 | 17 | 100 |
| SL17-5 | 99  | 52  | 66076    | 5.0  | 9.4050  | 0.8 | 4.6215  | 1.4 | 0.3154 | 1.1 | 0.82 | 1767 | 17 | 1753 | 11 | 1737 | 14 | 1737 | 14 | 102 |
| SL17-5 | 100 | 257 | 193328   | 2.3  | 18.5604 | 0.8 | 0.4447  | 1.2 | 0.0599 | 0.9 | 0.76 | 375  | 3  | 374  | 4  | 365  | 18 | 375  | 3  | NA  |
| SL17-5 | 101 | 177 | 115532   | 2.1  | 5.3706  | 0.6 | 12.8824 | 1.3 | 0.5020 | 1.1 | 0.87 | 2622 | 24 | 2671 | 12 | 2708 | 11 | 2708 | 11 | 97  |
| SL17-5 | 102 | 42  | 39658    | 1.6  | 13.5097 | 1.1 | 1.7231  | 1.6 | 0.1689 | 1.2 | 0.74 | 1006 | 11 | 1017 | 10 | 1041 | 22 | 1041 | 22 | 97  |
| SL17-5 | 103 | 215 | 76220    | 3.6  | 10.9560 | 0.8 | 3.1545  | 1.4 | 0.2508 | 1.1 | 0.79 | 1442 | 14 | 1446 | 10 | 1451 | 16 | 1451 | 16 | 99  |
| SL17-5 | 104 | 135 | 106607   | 4.8  | 13.5737 | 0.8 | 1.7248  | 1.3 | 0.1699 | 1.0 | 0.80 | 1011 | 10 | 1018 | 8  | 1032 | 15 | 1032 | 15 | 98  |
| SL17-5 | 105 | 317 | 334265   | 2.4  | 5.3347  | 0.6 | 13.7533 | 1.3 | 0.5324 | 1.1 | 0.87 | 2751 | 25 | 2733 | 12 | 2719 | 10 | 2719 | 10 | 101 |
| SL17-5 | 106 | 102 | 25004    | 2.6  | 13.8816 | 0.9 | 1.6728  | 1.3 | 0.1685 | 1.0 | 0.73 | 1004 | 9  | 998  | 8  | 986  | 18 | 986  | 18 | 102 |
| SL17-5 | 107 | 53  | 156282   | 2.8  | 12.1850 | 0.8 | 2.3699  | 1.3 | 0.2095 | 1.0 | 0.75 | 1226 | 11 | 1234 | 9  | 1246 | 16 | 1246 | 16 | 98  |
| SL17-5 | 108 | 38  | 992044   | 2.1  | 10.6949 | 1.8 | 3.2875  | 2.6 | 0.2551 | 1.9 | 0.74 | 1465 | 25 | 1478 | 20 | 1497 | 33 | 1497 | 33 | 98  |
| SL17-5 | 109 | 87  | 659453   | 2.3  | 6.5907  | 0.5 | 8.4723  | 1.3 | 0.4052 | 1.2 | 0.93 | 2193 | 23 | 2283 | 12 | 2365 | 8  | 2365 | 8  | 93  |
| SL17-5 | 110 | 326 | 351685   | 1.9  | 8.6298  | 0.6 | 5.3674  | 1.1 | 0.3361 | 1.0 | 0.86 | 1868 | 16 | 1880 | 10 | 1893 | 10 | 1893 | 10 | 99  |
| SL17-5 | 111 | 184 | 80952    | 1.8  | 13.3019 | 0.7 | 1.8322  | 1.1 | 0.1768 | 0.8 | 0.77 | 1050 | 8  | 1057 | 7  | 1072 | 14 | 1072 | 14 | 98  |
| SL17-5 | 112 | 35  | 25371    | 3.9  | 13.6980 | 1.0 | 1.7025  | 1.4 | 0.1692 | 1.0 | 0.72 | 1008 | 10 | 1009 | 9  | 1013 | 20 | 1013 | 20 | 99  |
| SL17-5 | 113 | 176 | 152531   | 2.8  | 13.0147 | 0.8 | 1.9973  | 1.6 | 0.1886 | 1.3 | 0.86 | 1114 | 14 | 1115 | 11 | 1116 | 16 | 1116 | 16 | 100 |
| SL17-5 | 114 | 111 | 68689    | 2.1  | 11.8774 | 0.9 | 2.4298  | 1.5 | 0.2094 | 1.2 | 0.80 | 1226 | 13 | 1251 | 11 | 1296 | 17 | 1296 | 17 | 95  |
| SL17-5 | 115 | 114 | 144319   | 2.4  | 10.9907 | 0.8 | 3.0394  | 1.2 | 0.2424 | 0.9 | 0.76 | 1399 | 11 | 1418 | 9  | 1445 | 15 | 1445 | 15 | 97  |
| SL17-5 | 116 | 39  | 98292    | 2.1  | 13.2529 | 1.0 | 1.8757  | 1.5 | 0.1804 | 1.1 | 0.74 | 1069 | 11 | 1073 | 10 | 1080 | 20 | 1080 | 20 | 99  |
| SL17-5 | 117 | 227 | 125779   | 4.9  | 13.5287 | 0.6 | 1.7420  | 0.9 | 0.1710 | 0.6 | 0.70 | 1018 | 6  | 1024 | 6  | 1038 | 13 | 1038 | 13 | 98  |
| SL17-5 | 118 | 205 | 199344   | 1.8  | 9.9450  | 0.6 | 4.0196  | 1.3 | 0.2901 | 1.1 | 0.89 | 1642 | 16 | 1638 | 10 | 1634 | 11 | 1634 | 11 | 101 |
| SL17-5 | 119 | 207 | 57721    | 3.3  | 12.8523 | 0.8 | 2.0734  | 1.2 | 0.1934 | 0.9 | 0.76 | 1140 | 10 | 1140 | 8  | 1141 | 16 | 1141 | 16 | 100 |
| SL17-5 | 120 | 95  | 239310   | 1.8  | 10.2417 | 0.7 | 3.6298  | 1.4 | 0.2697 | 1.2 | 0.85 | 1539 | 16 | 1556 | 11 | 1579 | 13 | 1579 | 13 | 98  |

|        |     |      |         |      |         |     |         |     |        |     |      |      |    |      |    |      |    |      |    |     |
|--------|-----|------|---------|------|---------|-----|---------|-----|--------|-----|------|------|----|------|----|------|----|------|----|-----|
| SL17-5 | 121 | 164  | 103188  | 1.8  | 13.4914 | 0.7 | 1.7582  | 1.2 | 0.1721 | 1.0 | 0.83 | 1024 | 9  | 1030 | 8  | 1044 | 14 | 1044 | 14 | 98  |
| SL17-5 | 122 | 96   | 75589   | 1.7  | 13.0600 | 0.8 | 1.9647  | 1.3 | 0.1862 | 1.1 | 0.81 | 1101 | 11 | 1104 | 9  | 1109 | 16 | 1109 | 16 | 99  |
| SL17-5 | 123 | 249  | 129803  | 2.9  | 13.1890 | 0.6 | 1.8903  | 1.2 | 0.1809 | 1.0 | 0.88 | 1072 | 10 | 1078 | 8  | 1089 | 11 | 1089 | 11 | 98  |
| SL17-5 | 124 | 123  | 6241906 | 0.8  | 7.5259  | 0.7 | 6.7880  | 1.3 | 0.3707 | 1.0 | 0.80 | 2033 | 18 | 2084 | 11 | 2136 | 13 | 2136 | 13 | 95  |
| SL17-5 | 125 | 79   | 753016  | 3.8  | 13.6853 | 0.8 | 1.6995  | 1.3 | 0.1688 | 1.0 | 0.76 | 1005 | 9  | 1008 | 8  | 1015 | 17 | 1015 | 17 | 99  |
| SL17-5 | 126 | 508  | 278999  | 7.1  | 13.7998 | 0.6 | 1.7022  | 1.2 | 0.1704 | 1.0 | 0.87 | 1015 | 9  | 1009 | 7  | 998  | 11 | 998  | 11 | 102 |
| SL17-5 | 127 | 69   | 29985   | 1.8  | 13.6069 | 0.9 | 1.7818  | 1.3 | 0.1759 | 0.9 | 0.71 | 1045 | 9  | 1039 | 9  | 1027 | 19 | 1027 | 19 | 102 |
| SL17-5 | 128 | 115  | 54905   | 1.9  | 9.6164  | 1.0 | 3.8081  | 1.6 | 0.2657 | 1.3 | 0.80 | 1519 | 17 | 1594 | 13 | 1696 | 18 | 1696 | 18 | 90  |
| SL17-5 | 129 | 102  | 21853   | 1.7  | 9.5263  | 0.9 | 4.1583  | 1.5 | 0.2874 | 1.2 | 0.81 | 1629 | 18 | 1666 | 13 | 1713 | 17 | 1713 | 17 | 95  |
| SL17-5 | 130 | 204  | 80704   | 0.8  | 16.4294 | 0.7 | 0.8301  | 1.4 | 0.0990 | 1.3 | 0.87 | 608  | 7  | 614  | 7  | 634  | 15 | 608  | 7  | 96  |
| SL17-5 | 131 | 191  | 223510  | 3.0  | 9.3646  | 0.7 | 4.4387  | 1.1 | 0.3016 | 0.9 | 0.78 | 1699 | 13 | 1720 | 9  | 1744 | 13 | 1744 | 13 | 97  |
| SL17-5 | 132 | 539  | 110142  | 6.4  | 13.4223 | 0.7 | 1.8208  | 1.3 | 0.1773 | 1.1 | 0.86 | 1052 | 11 | 1053 | 9  | 1054 | 14 | 1054 | 14 | 100 |
| SL17-5 | 133 | 83   | 128736  | 2.3  | 4.9455  | 0.9 | 14.6181 | 1.2 | 0.5245 | 0.9 | 0.72 | 2718 | 20 | 2791 | 12 | 2843 | 14 | 2843 | 14 | 96  |
| SL17-5 | 134 | 58   | 241470  | 2.3  | 10.9178 | 0.7 | 3.2262  | 1.3 | 0.2556 | 1.0 | 0.82 | 1467 | 14 | 1463 | 10 | 1458 | 14 | 1458 | 14 | 101 |
| SL17-5 | 135 | 26   | 3251464 | 2.6  | 12.5016 | 1.6 | 1.8804  | 2.0 | 0.1706 | 1.1 | 0.57 | 1015 | 11 | 1074 | 13 | 1196 | 32 | 1196 | 32 | 85  |
| SL17-5 | 136 | 90   | 45712   | 4.8  | 13.1564 | 0.9 | 1.8910  | 1.4 | 0.1805 | 1.1 | 0.77 | 1070 | 11 | 1078 | 9  | 1094 | 18 | 1094 | 18 | 98  |
| SL17-5 | 137 | 113  | 60734   | 2.1  | 13.0599 | 0.7 | 1.9979  | 1.1 | 0.1893 | 0.9 | 0.80 | 1118 | 9  | 1115 | 8  | 1109 | 13 | 1109 | 13 | 101 |
| SL17-5 | 138 | 87   | 197603  | 1.6  | 5.8390  | 0.8 | 10.9779 | 1.2 | 0.4651 | 0.8 | 0.71 | 2462 | 17 | 2521 | 11 | 2569 | 14 | 2569 | 14 | 96  |
| SL17-5 | 139 | 77   | 189162  | 1.9  | 4.1527  | 0.6 | 20.1226 | 1.2 | 0.6063 | 1.0 | 0.83 | 3055 | 23 | 3097 | 11 | 3125 | 10 | 3125 | 10 | 98  |
| SL17-5 | 140 | 55   | 14927   | 1.9  | 17.4883 | 1.4 | 0.5785  | 1.8 | 0.0734 | 1.1 | 0.61 | 457  | 5  | 463  | 7  | 498  | 31 | 457  | 5  | 92  |
| SL17-5 | 141 | 131  | 106892  | 1.5  | 6.3047  | 0.7 | 9.9326  | 1.1 | 0.4544 | 0.9 | 0.81 | 2415 | 19 | 2429 | 11 | 2440 | 11 | 2440 | 11 | 99  |
| SL17-5 | 142 | 580  | 131489  | 7.1  | 16.1784 | 0.7 | 0.9057  | 1.4 | 0.1063 | 1.2 | 0.87 | 651  | 7  | 655  | 7  | 667  | 15 | 651  | 7  | 98  |
| SL17-5 | 143 | 1005 | 1447985 | 6.8  | 13.5676 | 0.5 | 1.7921  | 1.1 | 0.1764 | 0.9 | 0.86 | 1047 | 9  | 1043 | 7  | 1033 | 11 | 1033 | 11 | 101 |
| SL17-5 | 144 | 188  | 132815  | 4.8  | 13.6621 | 0.7 | 1.6881  | 1.4 | 0.1673 | 1.2 | 0.88 | 997  | 11 | 1004 | 9  | 1018 | 13 | 1018 | 13 | 98  |
| SL17-5 | 145 | 124  | 52191   | 4.8  | 14.2112 | 0.7 | 1.5612  | 1.2 | 0.1610 | 1.0 | 0.82 | 962  | 9  | 955  | 7  | 938  | 14 | 938  | 14 | 103 |
| SL17-5 | 146 | 142  | 348810  | 1.5  | 9.7607  | 0.6 | 4.2156  | 1.2 | 0.2986 | 1.1 | 0.89 | 1684 | 16 | 1677 | 10 | 1668 | 10 | 1668 | 10 | 101 |
| SL17-5 | 147 | 216  | 151671  | 4.1  | 12.9017 | 0.7 | 2.1084  | 1.4 | 0.1974 | 1.2 | 0.87 | 1161 | 12 | 1152 | 9  | 1133 | 14 | 1133 | 14 | 102 |
| SL17-5 | 150 | 239  | 287893  | 5.0  | 5.3243  | 0.7 | 13.2277 | 1.2 | 0.5110 | 1.0 | 0.82 | 2661 | 22 | 2696 | 12 | 2722 | 12 | 2722 | 12 | 98  |
| SL17-5 | 151 | 169  | 75713   | 3.2  | 11.6675 | 0.6 | 2.6878  | 1.3 | 0.2275 | 1.1 | 0.86 | 1322 | 13 | 1325 | 9  | 1331 | 12 | 1331 | 12 | 99  |
| SL17-5 | 152 | 73   | 28170   | 0.9  | 13.9019 | 0.7 | 1.6708  | 1.2 | 0.1685 | 1.0 | 0.81 | 1004 | 9  | 998  | 8  | 983  | 14 | 983  | 14 | 102 |
| SL17-5 | 153 | 142  | 131705  | 4.2  | 12.3149 | 0.7 | 2.1518  | 1.2 | 0.1923 | 1.0 | 0.82 | 1134 | 10 | 1166 | 8  | 1225 | 14 | 1225 | 14 | 93  |
| SL17-5 | 154 | 118  | 66683   | 3.7  | 10.8155 | 0.8 | 3.1963  | 1.2 | 0.2508 | 1.0 | 0.78 | 1443 | 12 | 1456 | 9  | 1476 | 14 | 1476 | 14 | 98  |
| SL17-5 | 155 | 146  | 111618  | 3.2  | 13.3313 | 0.8 | 1.8681  | 1.3 | 0.1807 | 1.1 | 0.80 | 1071 | 11 | 1070 | 9  | 1068 | 16 | 1068 | 16 | 100 |
| SL17-5 | 156 | 269  | 853357  | 2.6  | 13.0412 | 0.6 | 2.0008  | 0.9 | 0.1893 | 0.7 | 0.78 | 1118 | 8  | 1116 | 6  | 1112 | 12 | 1112 | 12 | 101 |
| SL17-5 | 157 | 337  | 191348  | 2.7  | 9.4354  | 0.6 | 4.2889  | 1.4 | 0.2936 | 1.3 | 0.89 | 1660 | 18 | 1691 | 12 | 1731 | 12 | 1731 | 12 | 96  |
| SL17-5 | 158 | 9    | 42964   | 10.1 | 5.2168  | 0.9 | 13.8447 | 1.6 | 0.5241 | 1.3 | 0.81 | 2716 | 28 | 2739 | 15 | 2756 | 15 | 2756 | 15 | 99  |
| SL17-5 | 159 | 106  | 72223   | 1.8  | 10.7612 | 0.7 | 3.3323  | 1.1 | 0.2602 | 0.8 | 0.74 | 1491 | 11 | 1489 | 8  | 1486 | 14 | 1486 | 14 | 100 |
| SL17-5 | 160 | 200  | 131457  | 0.9  | 10.0594 | 0.5 | 3.9208  | 0.8 | 0.2862 | 0.6 | 0.79 | 1622 | 9  | 1618 | 6  | 1612 | 9  | 1612 | 9  | 101 |
| SL17-5 | 161 | 583  | 144900  | 2.3  | 12.7773 | 0.5 | 2.0812  | 1.3 | 0.1929 | 1.2 | 0.92 | 1137 | 13 | 1143 | 9  | 1153 | 10 | 1153 | 10 | 99  |
| SL17-5 | 162 | 57   | 143717  | 2.8  | 13.3373 | 0.9 | 1.8180  | 1.4 | 0.1759 | 1.1 | 0.77 | 1045 | 11 | 1052 | 9  | 1067 | 19 | 1067 | 19 | 98  |
| SL17-5 | 163 | 230  | 161852  | 4.1  | 11.4210 | 0.7 | 2.9184  | 1.2 | 0.2418 | 1.0 | 0.82 | 1396 | 13 | 1387 | 9  | 1372 | 13 | 1372 | 13 | 102 |
| SL17-5 | 164 | 21   | 7499    | 1.3  | 13.4389 | 1.5 | 1.8641  | 1.8 | 0.1818 | 0.9 | 0.52 | 1077 | 9  | 1068 | 12 | 1052 | 30 | 1052 | 30 | 102 |
| SL17-5 | 165 | 432  | 1383750 | 12.7 | 9.4038  | 0.6 | 4.4889  | 1.3 | 0.3063 | 1.2 | 0.89 | 1722 | 18 | 1729 | 11 | 1737 | 11 | 1737 | 11 | 99  |
| SL17-5 | 166 | 141  | 232115  | 1.0  | 10.5029 | 0.7 | 3.3351  | 1.3 | 0.2542 | 1.1 | 0.83 | 1460 | 14 | 1489 | 10 | 1531 | 14 | 1531 | 14 | 95  |
| SL17-5 | 167 | 46   | 37811   | 3.6  | 10.5727 | 0.9 | 3.3711  | 1.3 | 0.2586 | 1.0 | 0.76 | 1483 | 13 | 1498 | 10 | 1519 | 16 | 1519 | 16 | 98  |
| SL17-5 | 168 | 521  | 25523   | 3.7  | 11.9705 | 1.0 | 2.2494  | 1.4 | 0.1954 | 1.0 | 0.70 | 1150 | 10 | 1197 | 10 | 1281 | 19 | 1281 | 19 | 90  |

|        |     |      |         |      |         |     |         |     |        |     |      |      |    |      |    |      |    |      |    |     |
|--------|-----|------|---------|------|---------|-----|---------|-----|--------|-----|------|------|----|------|----|------|----|------|----|-----|
| SL17-5 | 169 | 518  | 119424  | 7.8  | 13.3926 | 0.7 | 1.7290  | 1.1 | 0.1680 | 0.9 | 0.81 | 1001 | 8  | 1019 | 7  | 1059 | 13 | 1059 | 13 | 95  |
| SL17-5 | 170 | 46   | 16968   | 1.5  | 13.8897 | 1.2 | 1.6337  | 1.6 | 0.1646 | 1.1 | 0.66 | 983  | 10 | 983  | 10 | 985  | 25 | 985  | 25 | 100 |
| SL17-5 | 171 | 219  | 43034   | 7.4  | 13.8285 | 0.6 | 1.6188  | 1.3 | 0.1624 | 1.1 | 0.88 | 970  | 10 | 978  | 8  | 994  | 13 | 994  | 13 | 98  |
| SL17-5 | 172 | 153  | 86419   | 1.1  | 17.0737 | 1.0 | 0.5856  | 1.4 | 0.0725 | 1.0 | 0.70 | 451  | 4  | 468  | 5  | 550  | 21 | 451  | 4  | 82  |
| SL17-5 | 173 | 164  | 126220  | 2.2  | 10.1482 | 0.6 | 3.8232  | 1.1 | 0.2815 | 0.9 | 0.84 | 1599 | 13 | 1598 | 9  | 1596 | 11 | 1596 | 11 | 100 |
| SL17-5 | 174 | 184  | 263707  | 4.0  | 9.9523  | 0.6 | 3.9953  | 1.0 | 0.2885 | 0.8 | 0.83 | 1634 | 12 | 1633 | 8  | 1632 | 10 | 1632 | 10 | 100 |
| SL17-5 | 175 | 422  | 311722  | 4.2  | 10.6081 | 0.6 | 3.3781  | 1.1 | 0.2600 | 0.9 | 0.83 | 1490 | 12 | 1499 | 9  | 1513 | 12 | 1513 | 12 | 98  |
| SL17-5 | 176 | 399  | 240625  | 3.2  | 12.0196 | 0.4 | 2.4819  | 0.9 | 0.2165 | 0.8 | 0.89 | 1263 | 9  | 1267 | 7  | 1273 | 8  | 1273 | 8  | 99  |
| SL17-5 | 177 | 159  | 96938   | 1.9  | 9.9058  | 0.6 | 4.0383  | 1.1 | 0.2903 | 0.9 | 0.82 | 1643 | 13 | 1642 | 9  | 1641 | 12 | 1641 | 12 | 100 |
| SL17-5 | 178 | 133  | 42610   | 1.3  | 17.8965 | 1.1 | 0.5725  | 1.7 | 0.0743 | 1.3 | 0.74 | 462  | 6  | 460  | 6  | 446  | 25 | 462  | 6  | 104 |
| SL17-5 | 179 | 148  | 102002  | 3.3  | 12.9232 | 0.5 | 2.0432  | 1.0 | 0.1916 | 0.9 | 0.85 | 1130 | 9  | 1130 | 7  | 1130 | 11 | 1130 | 11 | 100 |
| SL17-5 | 180 | 159  | 28058   | 3.8  | 12.2047 | 0.6 | 2.3555  | 1.1 | 0.2086 | 0.9 | 0.82 | 1221 | 10 | 1229 | 8  | 1243 | 13 | 1243 | 13 | 98  |
| SL17-5 | 181 | 85   | 160312  | 1.8  | 5.5040  | 0.6 | 13.2492 | 1.0 | 0.5291 | 0.8 | 0.81 | 2738 | 18 | 2698 | 9  | 2668 | 10 | 2668 | 10 | 103 |
| SL17-5 | 182 | 91   | 43539   | 2.6  | 12.7731 | 0.6 | 2.0493  | 1.0 | 0.1899 | 0.8 | 0.83 | 1121 | 9  | 1132 | 7  | 1153 | 11 | 1153 | 11 | 97  |
| SL17-5 | 183 | 149  | 1174923 | 1.8  | 5.4548  | 0.6 | 12.9610 | 2.6 | 0.5130 | 2.5 | 0.98 | 2669 | 56 | 2677 | 25 | 2682 | 9  | 2682 | 9  | 100 |
| SL17-5 | 184 | 1181 | 229797  | 12.9 | 13.2022 | 0.6 | 1.9151  | 1.0 | 0.1835 | 0.9 | 0.83 | 1086 | 9  | 1086 | 7  | 1087 | 12 | 1087 | 12 | 100 |
| SL17-5 | 185 | 36   | 91151   | 2.7  | 13.5452 | 0.8 | 1.6972  | 1.3 | 0.1668 | 1.0 | 0.76 | 995  | 9  | 1007 | 8  | 1036 | 17 | 1036 | 17 | 96  |
| SL17-5 | 186 | 52   | 33240   | 1.8  | 13.6828 | 0.8 | 1.7483  | 1.3 | 0.1736 | 1.0 | 0.79 | 1032 | 10 | 1027 | 9  | 1015 | 17 | 1015 | 17 | 102 |
| SL17-5 | 187 | 75   | 61774   | 0.9  | 10.4849 | 0.7 | 3.2811  | 1.3 | 0.2496 | 1.1 | 0.83 | 1436 | 14 | 1477 | 10 | 1535 | 14 | 1535 | 14 | 94  |
| SL17-5 | 188 | 103  | 102372  | 0.6  | 13.6159 | 0.8 | 1.7361  | 1.1 | 0.1715 | 0.7 | 0.68 | 1020 | 7  | 1022 | 7  | 1025 | 16 | 1025 | 16 | 100 |
| SL17-5 | 189 | 68   | 115187  | 1.2  | 13.6008 | 0.8 | 1.6992  | 1.1 | 0.1677 | 0.8 | 0.68 | 999  | 7  | 1008 | 7  | 1028 | 17 | 1028 | 17 | 97  |
| SL17-5 | 190 | 162  | 80242   | 3.3  | 13.7633 | 0.8 | 1.6858  | 1.1 | 0.1684 | 0.8 | 0.73 | 1003 | 8  | 1003 | 7  | 1003 | 16 | 1003 | 16 | 100 |
| SL17-5 | 191 | 310  | 130210  | 4.0  | 12.9073 | 0.6 | 2.1157  | 1.1 | 0.1981 | 0.8 | 0.79 | 1165 | 9  | 1154 | 7  | 1133 | 13 | 1133 | 13 | 103 |
| SL17-5 | 192 | 555  | 116847  | 1.1  | 11.6797 | 0.5 | 2.6264  | 1.1 | 0.2226 | 0.9 | 0.87 | 1295 | 11 | 1308 | 8  | 1329 | 10 | 1329 | 10 | 97  |
| SL17-5 | 193 | 78   | 50119   | 1.9  | 13.5352 | 1.0 | 1.7428  | 1.5 | 0.1712 | 1.1 | 0.75 | 1018 | 10 | 1024 | 9  | 1037 | 19 | 1037 | 19 | 98  |
| SL17-5 | 194 | 53   | 18999   | 3.9  | 13.6122 | 0.9 | 1.7497  | 1.2 | 0.1728 | 0.8 | 0.65 | 1028 | 8  | 1027 | 8  | 1026 | 19 | 1026 | 19 | 100 |
| SL17-5 | 195 | 156  | 124334  | 2.1  | 12.6240 | 0.7 | 2.1326  | 1.1 | 0.1953 | 0.8 | 0.75 | 1150 | 9  | 1159 | 8  | 1177 | 14 | 1177 | 14 | 98  |
| SL17-5 | 196 | 116  | 54915   | 1.5  | 17.8141 | 0.8 | 0.5651  | 1.1 | 0.0730 | 0.8 | 0.70 | 454  | 3  | 455  | 4  | 457  | 18 | 454  | 3  | 99  |
| SL17-5 | 197 | 42   | 267780  | 0.8  | 10.1546 | 0.9 | 3.6381  | 1.3 | 0.2681 | 0.9 | 0.73 | 1531 | 13 | 1558 | 10 | 1595 | 16 | 1595 | 16 | 96  |
| SL17-5 | 198 | 34   | 54714   | 2.6  | 12.1652 | 1.0 | 2.3710  | 1.4 | 0.2093 | 0.9 | 0.68 | 1225 | 11 | 1234 | 10 | 1249 | 20 | 1249 | 20 | 98  |
| SL17-5 | 199 | 249  | 1431057 | 0.7  | 9.8910  | 0.5 | 4.0084  | 1.0 | 0.2877 | 0.8 | 0.86 | 1630 | 12 | 1636 | 8  | 1644 | 9  | 1644 | 9  | 99  |
| SL17-5 | 200 | 205  | 79423   | 0.8  | 17.9540 | 0.8 | 0.5160  | 1.2 | 0.0672 | 0.8 | 0.72 | 419  | 3  | 422  | 4  | 439  | 18 | 419  | 3  | 95  |
| SL17-5 | 201 | 210  | 151621  | 3.0  | 10.5647 | 0.7 | 3.4194  | 1.2 | 0.2621 | 1.0 | 0.83 | 1501 | 14 | 1509 | 10 | 1520 | 13 | 1520 | 13 | 99  |
| SL17-5 | 202 | 99   | 118418  | 2.3  | 4.8413  | 0.7 | 15.7110 | 1.2 | 0.5519 | 0.9 | 0.79 | 2833 | 21 | 2859 | 11 | 2878 | 12 | 2878 | 12 | 98  |
| SL17-5 | 203 | 73   | 20283   | 3.1  | 12.9100 | 0.7 | 2.0229  | 1.1 | 0.1895 | 0.8 | 0.72 | 1119 | 8  | 1123 | 7  | 1132 | 15 | 1132 | 15 | 99  |
| SL17-5 | 204 | 200  | 589325  | 2.1  | 5.3809  | 0.7 | 12.2976 | 1.5 | 0.4801 | 1.3 | 0.89 | 2528 | 28 | 2627 | 14 | 2705 | 11 | 2705 | 11 | 93  |
| SL17-5 | 205 | 36   | 25030   | 4.5  | 12.9723 | 1.0 | 1.9233  | 1.4 | 0.1810 | 1.0 | 0.73 | 1073 | 10 | 1089 | 10 | 1123 | 19 | 1123 | 19 | 96  |
| SL17-5 | 206 | 96   | 162697  | 3.0  | 12.7625 | 0.7 | 1.9387  | 1.4 | 0.1795 | 1.2 | 0.87 | 1064 | 12 | 1095 | 9  | 1155 | 14 | 1155 | 14 | 92  |
| SL17-5 | 207 | 53   | 26452   | 3.0  | 13.6335 | 0.7 | 1.7700  | 1.3 | 0.1751 | 1.1 | 0.86 | 1040 | 11 | 1035 | 9  | 1023 | 14 | 1023 | 14 | 102 |
| SL17-5 | 209 | 208  | 65686   | 5.1  | 12.9499 | 0.7 | 1.9171  | 1.2 | 0.1801 | 0.9 | 0.80 | 1068 | 9  | 1087 | 8  | 1126 | 14 | 1126 | 14 | 95  |
| SL17-5 | 210 | 293  | 3217254 | 5.3  | 13.9907 | 0.7 | 1.5805  | 1.1 | 0.1604 | 0.8 | 0.77 | 959  | 8  | 963  | 7  | 970  | 14 | 970  | 14 | 99  |
| SL17-5 | 211 | 41   | 110486  | 2.9  | 12.8554 | 1.0 | 2.0596  | 1.5 | 0.1921 | 1.1 | 0.72 | 1133 | 11 | 1135 | 10 | 1141 | 20 | 1141 | 20 | 99  |
| SL17-5 | 212 | 316  | 150701  | 3.8  | 11.0019 | 0.6 | 3.1255  | 1.2 | 0.2495 | 1.0 | 0.87 | 1436 | 13 | 1439 | 9  | 1444 | 11 | 1444 | 11 | 99  |
| SL17-5 | 213 | 175  | 44475   | 0.8  | 18.3031 | 1.0 | 0.4857  | 1.9 | 0.0645 | 1.7 | 0.86 | 403  | 6  | 402  | 6  | 396  | 22 | 403  | 6  | 102 |
| SL17-5 | 214 | 108  | 819667  | 8.8  | 10.6596 | 0.6 | 3.2864  | 1.0 | 0.2542 | 0.8 | 0.79 | 1460 | 10 | 1478 | 8  | 1503 | 12 | 1503 | 12 | 97  |
| SL17-5 | 215 | 93   | 55902   | 3.1  | 13.3585 | 0.9 | 1.8487  | 1.2 | 0.1792 | 0.9 | 0.69 | 1063 | 8  | 1063 | 8  | 1064 | 18 | 1064 | 18 | 100 |

|        |     |     |         |      |         |     |         |     |        |     |      |      |    |      |    |      |    |      |    |     |
|--------|-----|-----|---------|------|---------|-----|---------|-----|--------|-----|------|------|----|------|----|------|----|------|----|-----|
| SL17-5 | 216 | 149 | 212270  | 3.8  | 12.9173 | 0.8 | 2.0936  | 1.1 | 0.1962 | 0.7 | 0.67 | 1155 | 8  | 1147 | 7  | 1131 | 16 | 1131 | 16 | 102 |
| SL17-5 | 217 | 84  | 159163  | 1.5  | 5.2938  | 0.6 | 13.4488 | 1.1 | 0.5166 | 0.9 | 0.86 | 2685 | 21 | 2712 | 10 | 2732 | 9  | 2732 | 9  | 98  |
| SL17-5 | 218 | 154 | 98922   | 4.5  | 13.5825 | 0.7 | 1.7729  | 1.1 | 0.1747 | 0.8 | 0.75 | 1038 | 8  | 1036 | 7  | 1030 | 15 | 1030 | 15 | 101 |
| SL17-5 | 219 | 93  | 46186   | 2.3  | 13.4933 | 0.6 | 1.7906  | 1.0 | 0.1753 | 0.8 | 0.82 | 1041 | 8  | 1042 | 7  | 1044 | 12 | 1044 | 12 | 100 |
| SL17-5 | 220 | 28  | 35169   | 2.1  | 13.9440 | 1.2 | 1.6002  | 1.5 | 0.1619 | 1.0 | 0.65 | 967  | 9  | 970  | 10 | 977  | 24 | 977  | 24 | 99  |
| SL17-5 | 221 | 78  | 212672  | 2.7  | 7.4202  | 0.5 | 7.2848  | 0.9 | 0.3922 | 0.7 | 0.82 | 2133 | 13 | 2147 | 8  | 2160 | 9  | 2160 | 9  | 99  |
| SL17-5 | 222 | 45  | 31427   | 2.1  | 10.7812 | 0.7 | 3.2930  | 1.4 | 0.2576 | 1.2 | 0.85 | 1478 | 15 | 1479 | 11 | 1482 | 14 | 1482 | 14 | 100 |
| SL17-5 | 223 | 22  | 54016   | 1.3  | 13.0897 | 0.9 | 2.0195  | 1.4 | 0.1918 | 1.1 | 0.76 | 1131 | 11 | 1122 | 9  | 1105 | 18 | 1105 | 18 | 102 |
| SL17-5 | 224 | 252 | 133314  | 2.0  | 12.7146 | 0.8 | 2.0978  | 1.5 | 0.1935 | 1.3 | 0.84 | 1141 | 14 | 1148 | 11 | 1162 | 17 | 1162 | 17 | 98  |
| SL17-5 | 225 | 45  | 109117  | 2.2  | 12.7912 | 0.9 | 2.1016  | 1.2 | 0.1951 | 0.8 | 0.68 | 1149 | 9  | 1149 | 8  | 1151 | 18 | 1151 | 18 | 100 |
| SL17-5 | 226 | 118 | 101094  | 1.8  | 10.8641 | 0.7 | 3.3605  | 1.2 | 0.2649 | 1.0 | 0.80 | 1515 | 14 | 1495 | 10 | 1467 | 14 | 1467 | 14 | 103 |
| SL17-5 | 227 | 47  | 349010  | 1.0  | 13.8192 | 1.1 | 1.6984  | 1.5 | 0.1703 | 1.0 | 0.68 | 1014 | 9  | 1008 | 9  | 995  | 22 | 995  | 22 | 102 |
| SL17-5 | 228 | 278 | 288988  | 5.2  | 13.1175 | 0.5 | 1.9431  | 1.1 | 0.1849 | 1.0 | 0.90 | 1094 | 10 | 1096 | 7  | 1100 | 10 | 1100 | 10 | 99  |
| SL17-5 | 229 | 108 | 59456   | 3.9  | 12.6543 | 0.8 | 2.1302  | 1.3 | 0.1956 | 1.0 | 0.78 | 1152 | 11 | 1159 | 9  | 1172 | 16 | 1172 | 16 | 98  |
| SL17-5 | 230 | 184 | 63756   | 4.0  | 12.6183 | 0.8 | 2.1104  | 1.3 | 0.1932 | 1.1 | 0.81 | 1139 | 11 | 1152 | 9  | 1178 | 16 | 1178 | 16 | 97  |
| SL17-5 | 231 | 226 | 91216   | 1.0  | 10.3495 | 1.2 | 3.6704  | 2.6 | 0.2756 | 2.2 | 0.88 | 1569 | 31 | 1565 | 20 | 1559 | 23 | 1559 | 23 | 101 |
| SL17-5 | 232 | 255 | 884175  | 4.3  | 10.6689 | 0.8 | 3.3411  | 1.6 | 0.2586 | 1.4 | 0.86 | 1483 | 18 | 1491 | 12 | 1502 | 16 | 1502 | 16 | 99  |
| SL17-5 | 233 | 137 | 182204  | 2.2  | 13.6989 | 0.7 | 1.7860  | 1.0 | 0.1775 | 0.7 | 0.73 | 1053 | 7  | 1040 | 6  | 1013 | 13 | 1013 | 13 | 104 |
| SL17-5 | 234 | 57  | 169424  | 1.9  | 9.9607  | 0.9 | 3.8873  | 1.4 | 0.2809 | 1.1 | 0.78 | 1596 | 16 | 1611 | 11 | 1631 | 16 | 1631 | 16 | 98  |
| SL17-5 | 235 | 79  | 58121   | 2.6  | 10.6362 | 0.7 | 3.3276  | 1.2 | 0.2568 | 0.9 | 0.78 | 1473 | 12 | 1488 | 9  | 1508 | 14 | 1508 | 14 | 98  |
| SL17-5 | 238 | 89  | 118919  | 1.2  | 10.0276 | 0.7 | 3.9825  | 1.3 | 0.2898 | 1.1 | 0.86 | 1640 | 16 | 1631 | 11 | 1618 | 12 | 1618 | 12 | 101 |
| SL17-5 | 239 | 306 | 74910   | 0.9  | 10.6619 | 0.8 | 3.3773  | 1.4 | 0.2613 | 1.2 | 0.84 | 1496 | 16 | 1499 | 11 | 1503 | 15 | 1503 | 15 | 100 |
| SL17-5 | 240 | 89  | 73216   | 5.3  | 10.0498 | 1.1 | 3.5749  | 1.5 | 0.2607 | 1.0 | 0.67 | 1493 | 13 | 1544 | 12 | 1614 | 20 | 1614 | 20 | 93  |
| SL17-5 | 241 | 36  | 68567   | 2.0  | 10.1789 | 0.7 | 3.8720  | 1.2 | 0.2860 | 1.0 | 0.81 | 1621 | 14 | 1608 | 10 | 1590 | 13 | 1590 | 13 | 102 |
| SL17-5 | 242 | 196 | 78188   | 3.9  | 18.0958 | 1.0 | 0.5135  | 1.3 | 0.0674 | 0.9 | 0.69 | 421  | 4  | 421  | 5  | 422  | 22 | 421  | 4  | 100 |
| SL17-5 | 243 | 260 | 329574  | 12.1 | 11.7012 | 0.6 | 2.6316  | 1.4 | 0.2234 | 1.3 | 0.89 | 1300 | 15 | 1310 | 11 | 1325 | 13 | 1325 | 13 | 98  |
| SL17-5 | 244 | 35  | 24613   | 3.0  | 13.8493 | 1.2 | 1.6119  | 1.5 | 0.1620 | 1.0 | 0.66 | 968  | 9  | 975  | 10 | 991  | 23 | 991  | 23 | 98  |
| SL17-5 | 245 | 25  | 7584    | 3.5  | 12.7384 | 0.9 | 2.1947  | 1.2 | 0.2029 | 0.8 | 0.66 | 1191 | 9  | 1179 | 8  | 1159 | 18 | 1159 | 18 | 103 |
| SL17-5 | 246 | 84  | 255874  | 3.0  | 11.5686 | 0.7 | 2.7871  | 1.2 | 0.2339 | 1.0 | 0.80 | 1355 | 12 | 1352 | 9  | 1347 | 14 | 1347 | 14 | 101 |
| SL17-5 | 247 | 73  | 45636   | 3.3  | 11.5914 | 0.9 | 2.6396  | 1.4 | 0.2220 | 1.1 | 0.80 | 1292 | 13 | 1312 | 10 | 1343 | 17 | 1343 | 17 | 96  |
| SL17-5 | 248 | 45  | 21033   | 2.0  | 14.1648 | 1.0 | 1.5057  | 1.4 | 0.1548 | 0.9 | 0.68 | 928  | 8  | 933  | 8  | 945  | 21 | 945  | 21 | 98  |
| SL17-5 | 249 | 113 | 74793   | 2.1  | 13.7896 | 0.7 | 1.6668  | 1.2 | 0.1668 | 0.9 | 0.78 | 994  | 8  | 996  | 7  | 1000 | 15 | 1000 | 15 | 99  |
| SL17-5 | 250 | 116 | 96153   | 2.2  | 4.9940  | 0.7 | 15.3346 | 1.4 | 0.5557 | 1.2 | 0.88 | 2849 | 29 | 2836 | 14 | 2827 | 11 | 2827 | 11 | 101 |
| SL17-5 | 251 | 276 | 271066  | 3.0  | 13.4573 | 0.7 | 1.8267  | 1.2 | 0.1784 | 1.0 | 0.83 | 1058 | 10 | 1055 | 8  | 1049 | 13 | 1049 | 13 | 101 |
| SL17-5 | 252 | 151 | 373070  | 2.7  | 10.8887 | 0.6 | 3.0145  | 1.1 | 0.2382 | 0.9 | 0.83 | 1377 | 11 | 1411 | 9  | 1463 | 12 | 1463 | 12 | 94  |
| SL17-5 | 253 | 127 | 125197  | 1.5  | 9.9248  | 0.7 | 4.0016  | 1.2 | 0.2882 | 0.9 | 0.79 | 1632 | 14 | 1635 | 10 | 1637 | 14 | 1637 | 14 | 100 |
| SL17-5 | 254 | 482 | 132927  | 4.4  | 13.4985 | 0.5 | 1.8117  | 1.1 | 0.1774 | 0.9 | 0.89 | 1053 | 9  | 1050 | 7  | 1043 | 10 | 1043 | 10 | 101 |
| SL17-5 | 255 | 329 | 1922078 | 3.3  | 9.4236  | 0.6 | 4.5870  | 1.2 | 0.3136 | 1.1 | 0.89 | 1759 | 17 | 1747 | 10 | 1733 | 11 | 1733 | 11 | 101 |
| SL17-5 | 256 | 171 | 3023256 | 1.5  | 9.8601  | 0.6 | 3.9985  | 1.0 | 0.2861 | 0.8 | 0.81 | 1622 | 12 | 1634 | 8  | 1649 | 11 | 1649 | 11 | 98  |
| SL17-5 | 257 | 449 | 88761   | 8.8  | 13.3268 | 0.8 | 1.8814  | 1.5 | 0.1819 | 1.2 | 0.82 | 1077 | 12 | 1075 | 10 | 1069 | 16 | 1069 | 16 | 101 |
| SL17-5 | 258 | 51  | 187238  | 1.0  | 10.5801 | 0.8 | 3.1208  | 1.3 | 0.2396 | 1.0 | 0.80 | 1385 | 13 | 1438 | 10 | 1518 | 14 | 1518 | 14 | 91  |
| SL17-5 | 260 | 171 | 100417  | 3.0  | 12.4085 | 0.8 | 2.3308  | 1.2 | 0.2098 | 0.9 | 0.77 | 1228 | 11 | 1222 | 9  | 1211 | 15 | 1211 | 15 | 101 |
| SL17-5 | 261 | 53  | 36850   | 2.6  | 11.6874 | 0.9 | 2.6370  | 1.4 | 0.2236 | 1.0 | 0.74 | 1301 | 12 | 1311 | 10 | 1327 | 18 | 1327 | 18 | 98  |
| SL17-5 | 262 | 243 | 193702  | 2.1  | 9.9331  | 0.5 | 3.9653  | 1.1 | 0.2858 | 1.0 | 0.90 | 1620 | 14 | 1627 | 9  | 1636 | 9  | 1636 | 9  | 99  |
| SL17-5 | 263 | 94  | 116632  | 1.3  | 10.0081 | 0.7 | 3.8441  | 1.2 | 0.2791 | 0.9 | 0.80 | 1587 | 13 | 1602 | 10 | 1622 | 13 | 1622 | 13 | 98  |
| SL17-5 | 264 | 39  | 22630   | 2.2  | 13.0713 | 0.9 | 1.9411  | 1.3 | 0.1841 | 0.9 | 0.71 | 1089 | 9  | 1095 | 9  | 1107 | 18 | 1107 | 18 | 98  |



|        |     |     |         |     |         |     |         |     |        |     |      |      |    |      |    |      |    |      |    |     |
|--------|-----|-----|---------|-----|---------|-----|---------|-----|--------|-----|------|------|----|------|----|------|----|------|----|-----|
| SL17-5 | 265 | 65  | 4835095 | 1.1 | 10.0309 | 0.8 | 3.7647  | 1.2 | 0.2740 | 0.9 | 0.75 | 1561 | 13 | 1585 | 10 | 1618 | 15 | 1618 | 15 | 97  |
| SL17-5 | 266 | 173 | 152521  | 8.9 | 9.2992  | 0.8 | 4.5377  | 1.3 | 0.3062 | 1.0 | 0.77 | 1722 | 15 | 1738 | 11 | 1757 | 15 | 1757 | 15 | 98  |
| SL17-5 | 267 | 47  | 118755  | 2.1 | 12.8271 | 1.1 | 2.0840  | 1.4 | 0.1940 | 0.9 | 0.64 | 1143 | 10 | 1144 | 10 | 1145 | 22 | 1145 | 22 | 100 |
| SL17-5 | 268 | 317 | 76138   | 2.6 | 11.0898 | 0.6 | 2.8514  | 1.0 | 0.2294 | 0.9 | 0.84 | 1332 | 10 | 1369 | 8  | 1428 | 11 | 1428 | 11 | 93  |
| SL17-5 | 269 | 249 | 87919   | 0.9 | 13.4391 | 0.8 | 1.7866  | 1.2 | 0.1742 | 0.9 | 0.74 | 1035 | 9  | 1041 | 8  | 1052 | 16 | 1052 | 16 | 98  |
| SL17-5 | 270 | 100 | 128872  | 1.8 | 10.9337 | 0.8 | 3.1883  | 1.2 | 0.2529 | 0.9 | 0.74 | 1454 | 12 | 1454 | 9  | 1455 | 15 | 1455 | 15 | 100 |
| SL17-5 | 271 | 115 | 107434  | 1.6 | 5.3409  | 0.5 | 13.7450 | 1.1 | 0.5327 | 1.0 | 0.89 | 2753 | 23 | 2732 | 11 | 2717 | 9  | 2717 | 9  | 101 |
| SL17-5 | 272 | 91  | 116587  | 4.6 | 12.4726 | 0.8 | 2.1830  | 1.2 | 0.1976 | 0.9 | 0.77 | 1162 | 10 | 1176 | 8  | 1200 | 15 | 1200 | 15 | 97  |
| SL17-5 | 273 | 403 | 95855   | 2.8 | 13.3653 | 0.5 | 1.8352  | 1.1 | 0.1780 | 0.9 | 0.87 | 1056 | 9  | 1058 | 7  | 1063 | 10 | 1063 | 10 | 99  |
| SL17-5 | 275 | 155 | 3087909 | 1.5 | 7.0004  | 0.5 | 7.5814  | 1.1 | 0.3851 | 0.9 | 0.87 | 2100 | 17 | 2183 | 10 | 2261 | 9  | 2261 | 9  | 93  |
| SL17-5 | 276 | 42  | 62223   | 1.4 | 11.8164 | 0.8 | 2.6380  | 1.3 | 0.2262 | 1.1 | 0.81 | 1314 | 12 | 1311 | 10 | 1306 | 15 | 1306 | 15 | 101 |
| SL17-5 | 277 | 105 | 155439  | 2.5 | 11.3222 | 0.8 | 2.8923  | 1.2 | 0.2376 | 0.9 | 0.75 | 1374 | 11 | 1380 | 9  | 1389 | 15 | 1389 | 15 | 99  |
| SL17-5 | 278 | 282 | 216964  | 1.9 | 10.9378 | 0.5 | 3.1772  | 1.5 | 0.2522 | 1.5 | 0.95 | 1450 | 19 | 1452 | 12 | 1455 | 9  | 1455 | 9  | 100 |
| SL17-5 | 279 | 36  | 126384  | 1.4 | 13.3145 | 1.0 | 1.8226  | 1.6 | 0.1761 | 1.2 | 0.75 | 1046 | 11 | 1054 | 10 | 1070 | 21 | 1070 | 21 | 98  |
| SL17-5 | 280 | 285 | 162027  | 2.9 | 10.8046 | 0.7 | 3.2836  | 1.3 | 0.2574 | 1.1 | 0.85 | 1477 | 14 | 1477 | 10 | 1478 | 13 | 1478 | 13 | 100 |
| SL17-5 | 281 | 127 | 138112  | 3.1 | 13.3450 | 0.7 | 1.8481  | 1.1 | 0.1789 | 0.8 | 0.74 | 1061 | 8  | 1063 | 7  | 1066 | 15 | 1066 | 15 | 100 |
| SL17-5 | 282 | 33  | 10604   | 1.4 | 14.0776 | 1.0 | 1.5748  | 1.4 | 0.1609 | 1.0 | 0.70 | 962  | 9  | 960  | 9  | 958  | 20 | 958  | 20 | 100 |
| SL17-5 | 283 | 200 | 300342  | 2.9 | 10.6001 | 0.7 | 3.4283  | 1.2 | 0.2637 | 0.9 | 0.81 | 1509 | 13 | 1511 | 9  | 1514 | 13 | 1514 | 13 | 100 |
| SL17-5 | 284 | 176 | 660136  | 1.2 | 9.7188  | 0.6 | 4.1021  | 1.3 | 0.2893 | 1.2 | 0.89 | 1638 | 17 | 1655 | 11 | 1676 | 11 | 1676 | 11 | 98  |
| SL17-5 | 285 | 63  | 225641  | 3.3 | 13.4758 | 0.7 | 1.8664  | 1.2 | 0.1825 | 0.9 | 0.78 | 1081 | 9  | 1069 | 8  | 1046 | 15 | 1046 | 15 | 103 |
| SL17-5 | 286 | 763 | 286466  | 5.3 | 9.2212  | 0.6 | 4.5447  | 1.1 | 0.3041 | 0.9 | 0.83 | 1711 | 13 | 1739 | 9  | 1773 | 11 | 1773 | 11 | 97  |
| SL17-5 | 287 | 178 | 983110  | 2.0 | 9.7297  | 0.6 | 4.0180  | 1.5 | 0.2837 | 1.4 | 0.91 | 1610 | 20 | 1638 | 12 | 1674 | 12 | 1674 | 12 | 96  |
| SL17-5 | 288 | 217 | 62917   | 3.5 | 12.8023 | 0.7 | 2.1386  | 1.1 | 0.1987 | 0.9 | 0.80 | 1168 | 9  | 1161 | 8  | 1149 | 13 | 1149 | 13 | 102 |
| SL17-5 | 289 | 103 | 60755   | 3.2 | 11.4552 | 0.7 | 2.8459  | 1.0 | 0.2365 | 0.8 | 0.76 | 1369 | 10 | 1368 | 8  | 1366 | 13 | 1366 | 13 | 100 |
| SL17-5 | 290 | 199 | 51085   | 1.4 | 17.1813 | 1.0 | 0.5557  | 1.5 | 0.0693 | 1.0 | 0.72 | 432  | 4  | 449  | 5  | 536  | 22 | 432  | 4  | 80  |
| SL17-5 | 291 | 182 | 191965  | 1.4 | 13.2153 | 0.8 | 1.8360  | 1.4 | 0.1761 | 1.1 | 0.80 | 1045 | 11 | 1058 | 9  | 1085 | 17 | 1085 | 17 | 96  |
| SL17-5 | 292 | 106 | 384078  | 3.8 | 11.6935 | 0.8 | 2.6541  | 1.2 | 0.2252 | 0.9 | 0.76 | 1309 | 11 | 1316 | 9  | 1326 | 15 | 1326 | 15 | 99  |
| SL17-5 | 293 | 297 | 96811   | 4.2 | 12.6305 | 0.8 | 2.1566  | 1.4 | 0.1976 | 1.2 | 0.85 | 1163 | 13 | 1167 | 10 | 1176 | 15 | 1176 | 15 | 99  |
| SL17-5 | 294 | 660 | 49102   | 1.5 | 15.9033 | 1.0 | 0.8113  | 1.5 | 0.0936 | 1.1 | 0.76 | 577  | 6  | 603  | 7  | 703  | 21 | 577  | 6  | 82  |
| SL17-5 | 296 | 114 | 102786  | 1.1 | 9.8496  | 0.6 | 4.0615  | 1.5 | 0.2903 | 1.3 | 0.90 | 1643 | 19 | 1647 | 12 | 1651 | 12 | 1651 | 12 | 99  |
| SL17-5 | 297 | 145 | 233318  | 1.7 | 9.8450  | 0.7 | 4.1769  | 1.1 | 0.2984 | 0.8 | 0.76 | 1683 | 13 | 1669 | 9  | 1652 | 13 | 1652 | 13 | 102 |
| SL17-5 | 298 | 111 | 152331  | 3.4 | 11.5238 | 0.8 | 2.7159  | 1.4 | 0.2271 | 1.2 | 0.83 | 1319 | 14 | 1333 | 11 | 1355 | 15 | 1355 | 15 | 97  |
| SL17-5 | 299 | 70  | 30132   | 1.6 | 13.0113 | 0.9 | 1.9402  | 1.5 | 0.1832 | 1.2 | 0.80 | 1084 | 12 | 1095 | 10 | 1117 | 18 | 1117 | 18 | 97  |
| SL17-5 | 300 | 205 | 109885  | 4.0 | 13.2471 | 0.6 | 1.8118  | 1.3 | 0.1742 | 1.1 | 0.89 | 1035 | 11 | 1050 | 8  | 1081 | 12 | 1081 | 12 | 96  |
| SL17-5 | 301 | 180 | 116409  | 1.6 | 10.9606 | 0.9 | 3.0109  | 1.6 | 0.2395 | 1.4 | 0.84 | 1384 | 17 | 1410 | 12 | 1451 | 17 | 1451 | 17 | 95  |
| SL17-5 | 302 | 341 | 74387   | 4.0 | 8.8171  | 0.7 | 4.8884  | 1.1 | 0.3127 | 0.9 | 0.76 | 1754 | 13 | 1800 | 10 | 1854 | 13 | 1854 | 13 | 95  |
| SL17-5 | 303 | 43  | 35062   | 4.2 | 13.3359 | 1.0 | 1.8967  | 1.5 | 0.1835 | 1.2 | 0.76 | 1086 | 12 | 1080 | 10 | 1067 | 20 | 1067 | 20 | 102 |
| SL17-5 | 304 | 51  | 211714  | 1.0 | 5.6124  | 0.6 | 11.9141 | 1.3 | 0.4852 | 1.2 | 0.89 | 2550 | 24 | 2598 | 12 | 2635 | 10 | 2635 | 10 | 97  |
| SL17-5 | 305 | 506 | 164705  | 4.5 | 11.8731 | 0.7 | 2.5158  | 1.5 | 0.2167 | 1.3 | 0.87 | 1265 | 15 | 1277 | 11 | 1297 | 14 | 1297 | 14 | 98  |
| SL17-5 | 306 | 167 | 30341   | 2.4 | 16.5367 | 0.8 | 0.8530  | 1.3 | 0.1024 | 1.0 | 0.79 | 628  | 6  | 626  | 6  | 620  | 17 | 628  | 6  | 101 |
| SL17-5 | 307 | 182 | 1172947 | 6.0 | 10.9368 | 0.6 | 3.1318  | 1.3 | 0.2485 | 1.2 | 0.89 | 1431 | 15 | 1441 | 10 | 1455 | 12 | 1455 | 12 | 98  |
| SL17-5 | 308 | 226 | 103709  | 3.7 | 12.7150 | 0.8 | 2.0992  | 1.1 | 0.1937 | 0.8 | 0.73 | 1141 | 8  | 1149 | 8  | 1162 | 15 | 1162 | 15 | 98  |
| SL17-5 | 309 | 55  | 178460  | 6.3 | 12.3686 | 0.7 | 2.3240  | 1.1 | 0.2086 | 0.8 | 0.72 | 1221 | 9  | 1220 | 8  | 1217 | 15 | 1217 | 15 | 100 |
| SL17-5 | 310 | 186 | 365403  | 3.2 | 13.5556 | 0.8 | 1.7262  | 1.2 | 0.1698 | 0.9 | 0.75 | 1011 | 9  | 1018 | 8  | 1034 | 17 | 1034 | 17 | 98  |
| SL17-5 | 311 | 85  | 492334  | 3.8 | 11.7861 | 0.8 | 2.5382  | 1.5 | 0.2171 | 1.2 | 0.83 | 1266 | 14 | 1283 | 11 | 1311 | 16 | 1311 | 16 | 97  |
| SL17-5 | 312 | 134 | 253558  | 2.9 | 12.9010 | 0.7 | 2.0815  | 1.1 | 0.1948 | 0.8 | 0.74 | 1148 | 8  | 1143 | 7  | 1134 | 14 | 1134 | 14 | 101 |

|        |     |     |        |     |         |     |        |     |        |     |      |      |    |      |   |      |    |      |    |     |
|--------|-----|-----|--------|-----|---------|-----|--------|-----|--------|-----|------|------|----|------|---|------|----|------|----|-----|
| SL17-5 | 313 | 195 | 56886  | 1.3 | 17.9036 | 0.9 | 0.5659 | 1.3 | 0.0735 | 1.0 | 0.77 | 457  | 5  | 455  | 5 | 446  | 19 | 457  | 5  | 103 |
| SL17-5 | 314 | 145 | 117601 | 2.7 | 13.2574 | 0.7 | 1.8587 | 1.3 | 0.1788 | 1.1 | 0.85 | 1060 | 11 | 1067 | 9 | 1079 | 14 | 1079 | 14 | 98  |
| SL17-5 | 315 | 134 | 153484 | 2.4 | 9.3221  | 0.7 | 4.6326 | 1.1 | 0.3133 | 0.9 | 0.78 | 1757 | 14 | 1755 | 9 | 1753 | 13 | 1753 | 13 | 100 |
